# Supplementary material for: Reforming of ethanol to hydrogen and acetic acid catalyzed by pincer-ruthenium complexes
Source: Royal Society of Chemistry journal article supplement (doi:10.1039/d3cy01107k), 2023-01-01
Supplement: d3cy01107k1.pdf [file d3cy01107k1.pdf]

## Supporting Information

### Reforming of Ethanol to Hydrogen and Acetic Acid Catalyzed by Pincer–Ruthenium Complexes

Vinay Arora,<sup>a</sup> Sunil Dhole<sup>b</sup> and Akshai Kumar<sup>\*a,c,d</sup>

<sup>a</sup>Department of Chemistry, Indian Institute of Technology Guwahati, Guwahati – 781039, Assam, India.

<sup>b</sup>ChemDist Group of Companies, Plot No 144 A, Sector 7, PCNTDA Bhosari, Pune – 411026, Maharashtra, India

<sup>c</sup>Center for Nanotechnology, Indian Institute of Technology Guwahati, Guwahati – 781039, Assam, India

<sup>d</sup>Jyoti and Bhupat Mehta School of Health Sciences and Technology, Indian Institute of Technology Guwahati, Guwahati – 781039, Assam, India

Email: [akshaikumar@iitg.ac.in](mailto:akshaikumar@iitg.ac.in)

#### Table of Contents

| Contents |                                                                               | Page |
|----------|-------------------------------------------------------------------------------|------|
| 1.       | General Methods                                                               | S2   |
| 2.       | Optimization tables                                                           | S2   |
| 3.       | Representative NMR Spectra                                                    | S5   |
| 4.       | HRMS analysis of reaction mixture: Comparison of simulated and observed peaks | S11  |
| 5.       | Representative GC Spectra                                                     | S14  |
| 6.       | Kinetic Studies: Reaction Profile Diagram                                     | S16  |
| 7.       | Kinetic Isotope Studies                                                       | S17  |
| 8.       | <sup>31</sup> P NMR studies                                                   | S18  |
| 9.       | IR Studies                                                                    | S19  |
| 10.      | Computational Studies                                                         | S21  |
| 11.      | Arrhenius Plots                                                               | S99  |

## 1. General Methods

All the experiments were performed either under air or an argon atmosphere. The amount of gas evolved was collected and measured by a manual gas burette (50 mL and 100 mL). The composition of the gas was analyzed by GC analysis and typically, only hydrogen was observed, though trace amounts of carbon dioxide was occasionally detected. For all the experiments, blank experiments were performed under same reaction conditions in the absence of catalyst and the gas volumes were corrected by blank values. The mmols of hydrogen gas liberated was obtained using the ideal gas equation and percent yield was calculated w.r.t limiting reagent i.e water (each mol of water gives 2 mols of hydrogen and one mole of acetic acid).

## 2. Optimization Tables

**Table S1: The **4b** catalyzed aqueous-phase reforming of ethanol using various bases.<sup>a</sup>**

| Entry | Base<br>(X equivalents)               | Volume of gas<br>evolved<br>(mL) | Volume of gas<br>evolved in<br>absence of<br>catalyst (mL) | mmols<br>of<br>gas | Yield of<br>H <sub>2</sub> <sup>b</sup><br>(%) | Yield<br>of<br>(%) | of <b>3</b> <sup>c</sup> |
|-------|---------------------------------------|----------------------------------|------------------------------------------------------------|--------------------|------------------------------------------------|--------------------|--------------------------|
| 1     | KO <sup>t</sup> Bu (0.5)              | 37.4                             | 13.2                                                       | 0.99               | 21                                             | 19                 |                          |
| 2     | NaO <sup>t</sup> Bu (0.5)             | 25.4                             | 12.2                                                       | 0.54               | 12                                             | 11                 |                          |
| 3     | NaOH (0.5)                            | 15.6                             | 15.2                                                       | 0.02               | Trace                                          | Trace              |                          |
| 4     | KOH (0.5)                             | 29.4                             | 13.7                                                       | 0.64               | 14                                             | 14                 |                          |
| 5     | NaOEt (0.5)                           | 29.6                             | 22.1                                                       | 0.30               | 6.58                                           | 6.59               |                          |
| 6     | Na <sub>2</sub> CO <sub>3</sub> (0.5) | 20.8                             | 20.7                                                       | 0.01               | Trace                                          | Trace              |                          |
| 7     | K <sub>2</sub> CO <sub>3</sub> (0.5)  | 23.7                             | 20.5                                                       | 0.13               | 1.12                                           | 2.7                |                          |
| 8     | Cs <sub>2</sub> CO <sub>3</sub> (0.5) | 16.5                             | 16.2                                                       | 0.01               | Trace                                          | Trace              |                          |
| 9     | NaHCO <sub>3</sub> (0.5)              | 16.6                             | 15.6                                                       | 0.04               | 1                                              | 1                  |                          |
| 10    | Na (0.5)                              | 31.3                             | 14                                                         | 0.71               | 15.                                            | 15                 |                          |
| 11    | KO <sup>t</sup> Bu (1.0)              | 56                               | 13.8                                                       | 1.72               | 37                                             | 35                 |                          |
| 12    | KO <sup>t</sup> Bu (1.5)              | 93.5                             | 14.2                                                       | 3.24               | 70                                             | 73                 |                          |
| 13    | KOH (1.0)                             | 33.9                             | 14.4                                                       | 1.72               | 17                                             | 17.4               |                          |
| 14    | KOH (1.5)                             | 44.5                             | 15.3                                                       | 3.24               | 25.7                                           | 25                 |                          |

<sup>a</sup>Reaction conditions: Ethanol (0.271 mL, 4.64 mmol), H<sub>2</sub>O (0.042 mL, 2.32 mmol), base (0.5 equivalents), and **4b** (0.2 mol %) at 120 °C. Gas evolution was determined by burette measurements after deducting the blank contribution. <sup>b</sup>Yield was calculated as moles of H<sub>2</sub> (as observed from GC and the amount of gas evolved)/moles of H<sub>2</sub>O. <sup>c</sup>Yield of acetic acid was calculated by <sup>1</sup>H NMR spectroscopy using DMSO as an internal standard.

**Table S2: Aqueous-phase reforming of ethanol using various ruthenium catalysts.<sup>a</sup>**

| Entry | Ru Catalysts (0.2 mol%)                              | Volume of gas evolved (mL) | Volume of gas evolved in absence of catalyst (mL) | mmols of gas in gas of | Yield of H <sub>2</sub> <sup>b</sup> (%) | Yield of 3 <sup>c</sup> (%) |
|-------|------------------------------------------------------|----------------------------|---------------------------------------------------|------------------------|------------------------------------------|-----------------------------|
| 1     | <b>4a</b>                                            | 81.9                       | 14.2                                              | 2.77                   | 60                                       | 59                          |
| 2     | <b>4b</b>                                            | 93.5                       | 14.2                                              | 3.24                   | 70                                       | 73                          |
| 3     | <b>4c</b>                                            | 79.6                       | 14.2                                              | 2.67                   | 58                                       | 58                          |
| 4     | <b>4d</b>                                            | 67.4                       | 14.2                                              | 2.17                   | 47                                       | 49                          |
| 5     | <b>4e</b>                                            | 68.1                       | 14.2                                              | 2.20                   | 48                                       | 47                          |
| 6     | <b>4f</b>                                            | 84.5                       | 14.2                                              | 2.88                   | 62                                       | 61                          |
| 7     | <b>5a</b>                                            | 33.7                       | 14.2                                              | 0.80                   | 17                                       | 18                          |
| 8     | <b>5b</b>                                            | 55.2                       | 14.2                                              | 1.67                   | 36                                       | 35                          |
| 9     | <b>5c</b>                                            | 63.1                       | 14.2                                              | 2.00                   | 43                                       | 43                          |
| 10    | <b>5d</b>                                            | 47.7                       | 14.2                                              | 1.37                   | 30                                       | 28                          |
| 11    | <b>5e</b>                                            | 92.9                       | 14.2                                              | 3.22                   | 69                                       | 70                          |
| 12    | <b>5f</b>                                            | 46.3                       | 14.2                                              | 1.31                   | 28                                       | 25                          |
| 13    | <b>6a</b>                                            | 39.0                       | 14.2                                              | 1.01                   | 22                                       | 23                          |
| 14    | <b>6b</b>                                            | 21.9                       | 14.2                                              | 0.32                   | 7                                        | 9                           |
| 15    | <b>6c</b>                                            | 48.4                       | 14.2                                              | 1.40                   | 30                                       | 32                          |
| 16    | RuCl <sub>2</sub> (PPh <sub>3</sub> ) <sub>3</sub>   | 25.4                       | 14.2                                              | 0.46                   | 10                                       | 10                          |
| 17    | RuCl <sub>3</sub> ·3H <sub>2</sub> O                 | 71.8                       | 14.2                                              | 2.35                   | 51                                       | 46                          |
| 18    | [Ru( <i>p</i> -cymene)Cl <sub>2</sub> ] <sub>2</sub> | 55.2                       | 14.2                                              | 1.68                   | 36                                       | 48                          |
| 19    | [Ru(benzene)Cl <sub>2</sub> ] <sub>2</sub>           | 37.3                       | 14.2                                              | 0.94                   | 21                                       | 14                          |
| 20    | <b>5b</b> <sup>d</sup>                               | 90.4                       | 14.2                                              | 3.11                   | 67                                       | 66                          |
| 21    | <b>6b</b> <sup>d</sup>                               | 96.4                       | 14.2                                              | 3.35                   | 72                                       | 71                          |
| 22    | <b>5e</b> <sup>e</sup>                               | 60.3                       | 14.2                                              | 1.88                   | 41                                       | 44                          |

<sup>a</sup>Reaction conditions: Ethanol (0.271 mL, 4.64 mmol), H<sub>2</sub>O (0.042 mL, 2.32 mmol), KO<sup>t</sup>Bu (0.5 equivalents), and **4b** (0.2 mol %) at 120 °C. Gas evolution was determined by burette measurements after deducting the blank contribution. <sup>b</sup>Yield was calculated as moles of H<sub>2</sub> (as observed from GC and the amount of gas evolved)/moles of H<sub>2</sub>O. <sup>c</sup>Yield of acetic acid was calculated by <sup>1</sup>H NMR spectroscopy using DMSO as an internal standard. <sup>d</sup>1 equivalent of PPh<sub>3</sub> w.r.t **5b/6b** was added. <sup>e</sup>2 equivalent of PPh<sub>3</sub> w.r.t **5e** was added.

**Table S3: The **4b** catalyzed aqueous-phase reforming of ethanol under various conditions.<sup>a</sup>**

| Entry             | <b>4b</b><br>(X mol%) | Volume of<br>gas evolved<br>(mL) | Volume of<br>gas evolved<br>in absence of<br>catalyst (mL) | mmols<br>of<br>gas | Yield<br>of<br>H <sub>2</sub> <sup>b</sup><br>(%) | Yield of <b>3</b> <sup>c</sup> (%) |
|-------------------|-----------------------|----------------------------------|------------------------------------------------------------|--------------------|---------------------------------------------------|------------------------------------|
| 1                 | 0.2                   | 93.5                             | 14.2                                                       | 3.24               | 70                                                | 73                                 |
| 2 <sup>d</sup>    | 0.2                   | 91.1                             | 14.2                                                       | 3.14               | 68                                                | 73                                 |
| 3 <sup>d,e</sup>  | 0.2                   | 28.5                             | 10.6                                                       | 0.73               | 16                                                | 16                                 |
| 4 <sup>d,f</sup>  | 0.2                   | 100.1                            | 16.4                                                       | 3.42               | 74                                                | 77                                 |
| 5 <sup>d,g</sup>  | 0.2                   | 90.7                             | 16.2                                                       | 3.04               | 66                                                | 61                                 |
| 6 <sup>d,h</sup>  | 0.2                   | 98.1                             | 18.9                                                       | 3.24               | 70                                                | 69                                 |
| 7                 | 0.1                   | 81.9                             | 14.2                                                       | 2.77               | 60                                                | 59                                 |
| 8                 | 0.4                   | 90.3                             | 14.2                                                       | 3.11               | 67                                                | 71                                 |
| 9                 | 0.6                   | 93.1                             | 14.2                                                       | 3.22               | 70                                                | 66                                 |
| 10                | 0.8                   | 90.1                             | 14.2                                                       | 3.10               | 67                                                | 67                                 |
| 11 <sup>d,i</sup> | Only EtOH             | 40.2                             | 14.0                                                       | 1.07               | 23                                                | 26                                 |
| 12 <sup>d,j</sup> | Only water            | 10.1                             | 10.1                                                       | -                  | -                                                 | -                                  |

<sup>a</sup>Reaction conditions: Ethanol (0.271 mL, 4.64 mmol), H<sub>2</sub>O (0.042 mL, 2.32 mmol), KO<sup>t</sup>Bu (0.5 equivalents), and **4b** (Y mol %) at 120 °C. Gas evolution was determined by burette measurements after deducting the blank contribution. <sup>b</sup>Yield was calculated as moles of H<sub>2</sub> (as observed from GC and the amount of gas evolved)/moles of H<sub>2</sub>O. <sup>c</sup>Yield of acetic acid was calculated by <sup>1</sup>H NMR spectroscopy using DMSO as an internal standard. <sup>d</sup>Reaction was performed in air. <sup>e</sup>Reaction was set up at 100 °C. <sup>f</sup>Reaction was set up at 140 °C. <sup>g</sup>6.95 mmol of ethanol, 2.32 mmol of water, 3.48 mmol of KO<sup>t</sup>Bu and 0.005 mmol of **4b** were used. <sup>h</sup>9.27 mmol of ethanol, 2.32 mmol of water, 3.48 mmol of KO<sup>t</sup>Bu and 0.005 mmol of **4b** were used. <sup>i</sup>4.64 mmol of ethanol, 3.48 mmol of KO<sup>t</sup>Bu and 0.005 mmol of **4b** were used. <sup>j</sup>2.32 mmol of water, 3.48 mmol of KO<sup>t</sup>Bu and 0.005 mmol of **4b** were used.

### 3. Representative NMR spectra

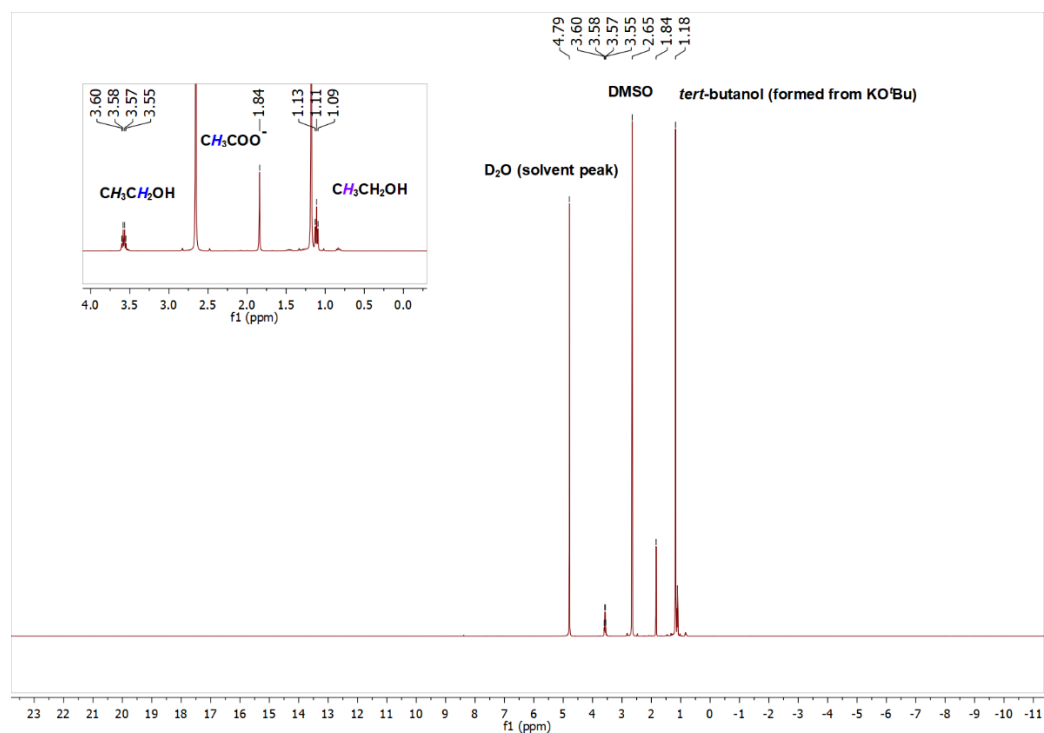

**Figure S1.**  $^1\text{H}$  NMR of reaction mixture (in  $\text{D}_2\text{O}$ ) obtained after the reaction. The yield of acetic acid is calculated using dimethyl sulfoxide (dms) as standard. Reaction condition: Ethanol (0.271 mL, 4.64 mmol),  $\text{H}_2\text{O}$  (0.042 mL, 2.32 mmol),  $\text{KO}^t\text{Bu}$  (1.5 equivalents), and **4b** (0.2 mol %) at 120 °C (Entry 1, Table 3).

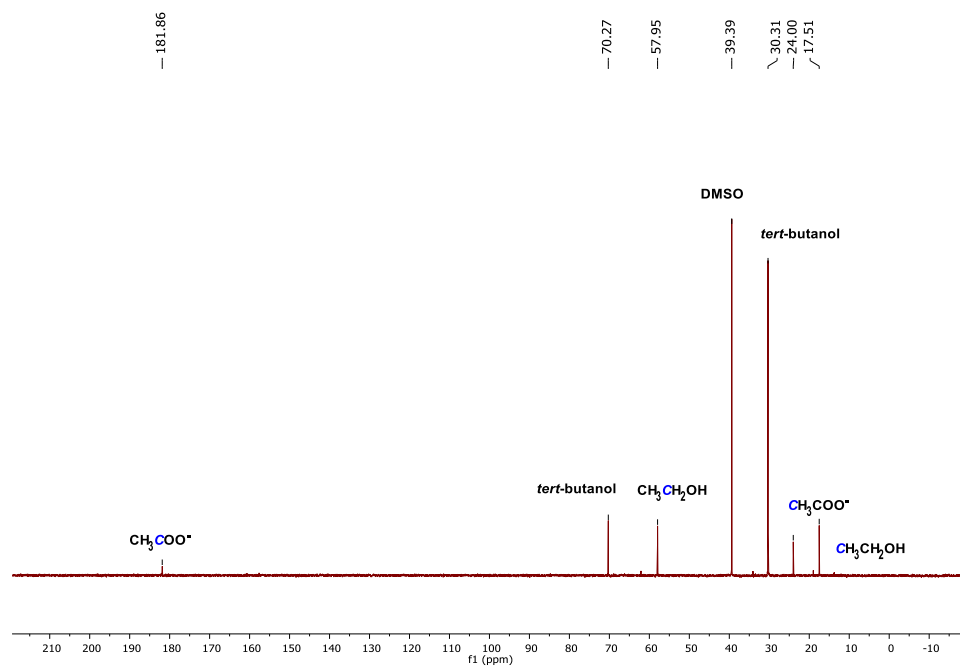

**Figure S2.**  $^{13}\text{C}$  NMR of reaction mixture (in  $\text{D}_2\text{O}$ ) obtained after the reaction. The yield of acetic acid is calculated using dimethyl sulfoxide (dms) as standard. Reaction condition: Ethanol (0.271 mL, 4.64 mmol),  $\text{H}_2\text{O}$  (0.042 mL, 2.32 mmol),  $\text{KO}^t\text{Bu}$  (1.5 equivalents), and **4b** (0.2 mol %) at 120 °C (Entry 1, Table 3).

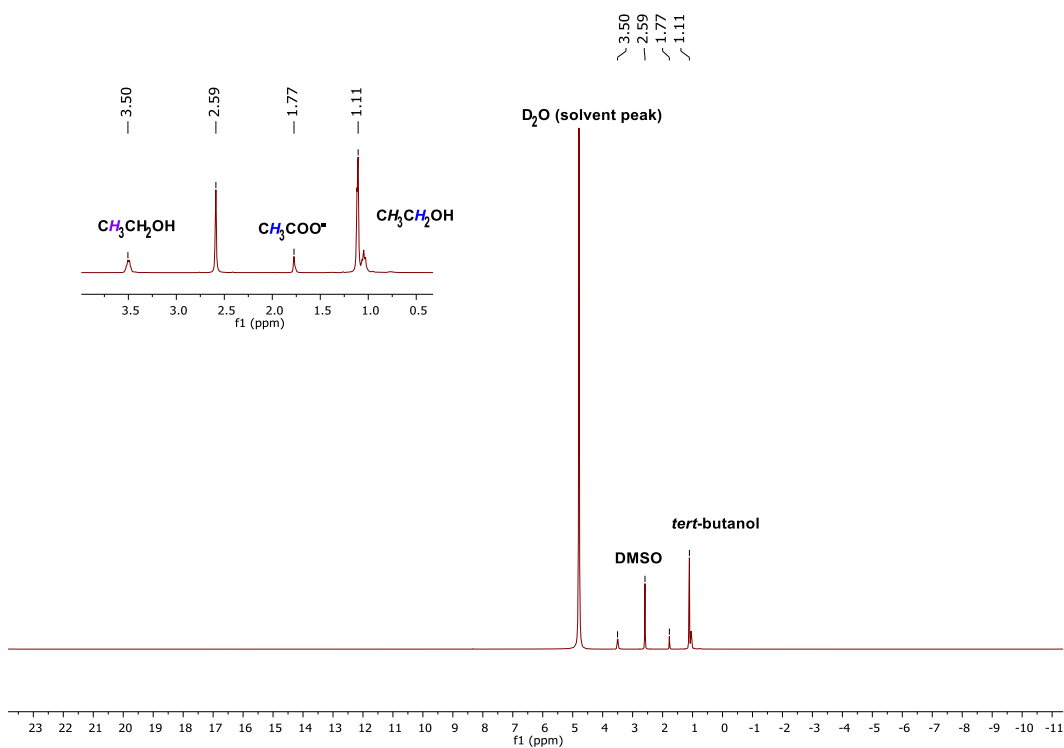

**Figure S3.**  $^1\text{H}$  NMR of reaction mixture (in  $\text{D}_2\text{O}$ ) obtained after the reaction. The yield of acetic acid is calculated using dimethyl sulfoxide (dmsO) as standard. Reaction condition: Ethanol (0.271 mL, 4.64 mmol),  $\text{D}_2\text{O}$  (0.042 mL, 2.32 mmol),  $\text{KO}^t\text{Bu}$  (1.5 equivalents), and **4b** (0.2 mol %) at 120 °C (Equation 2, Scheme 1).

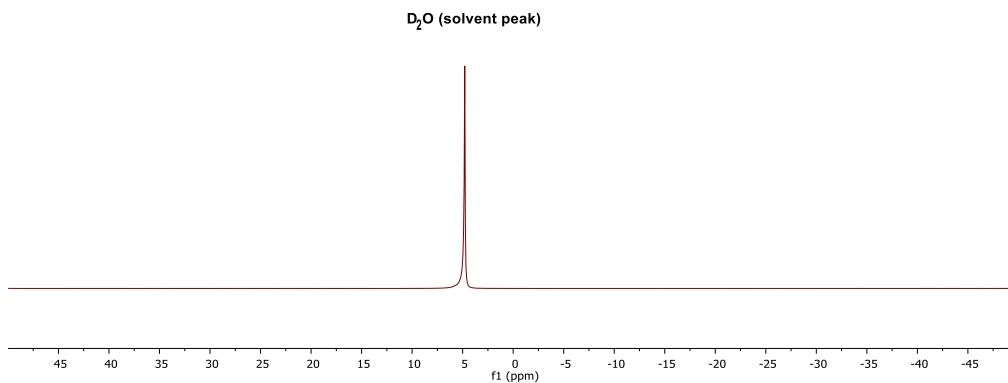

**Figure S4.**  $^2\text{H}$  NMR of reaction mixture (in  $\text{H}_2\text{O}$ ) obtained after the reaction. Reaction condition: Ethanol (0.271 mL, 4.64 mmol),  $\text{D}_2\text{O}$  (0.042 mL, 2.32 mmol),  $\text{KO}^t\text{Bu}$  (1.5 equivalents), and **4b** (0.2 mol %) at 120 °C (Equation 2, Scheme 1). It shows no incorporation of deuterium.

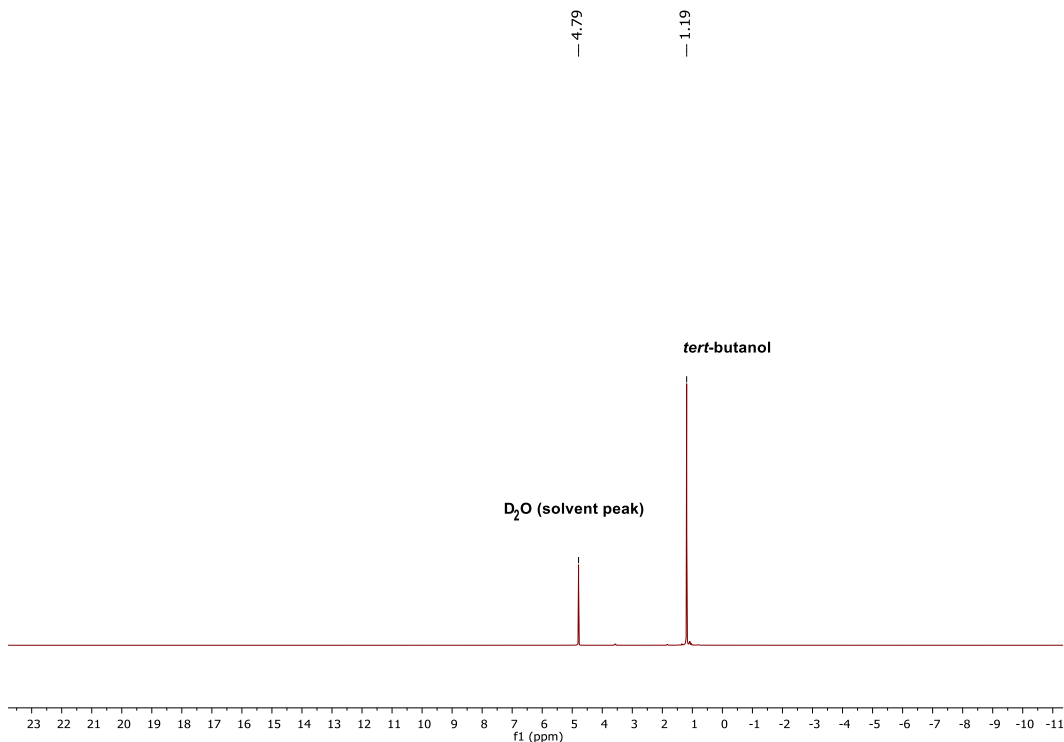

**Figure S5.**  $^1\text{H}$  NMR of reaction mixture (in  $\text{D}_2\text{O}$ ) obtained after the reaction. It implies that no deuterium loss has occurred during the reaction. Reaction condition: Ethanol- $\text{d}_6$  (0.271 mL, 4.64 mmol),  $\text{H}_2\text{O}$  (0.042 mL, 2.32 mmol),  $\text{KO}^t\text{Bu}$  (1.5 equivalents), and **4b** (0.2 mol %) at  $120^\circ\text{C}$  (Equation 3, Scheme 1).

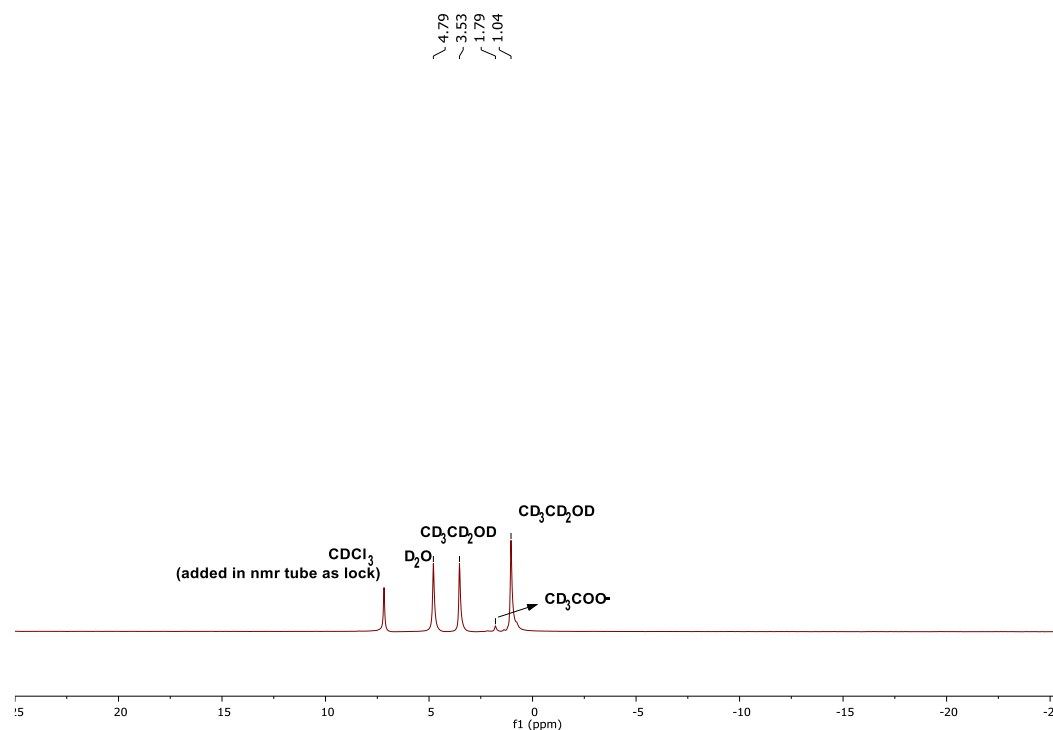

**Figure S6.**  $^2\text{H}$  NMR of reaction mixture (in  $\text{H}_2\text{O}$ ) obtained after the reaction. The yield of **3a** was calculated using  $\text{CDCl}_3$  which was added as lock in nmr tube. Reaction condition: Ethanol- $\text{d}_6$  (0.271 mL, 4.64 mmol),  $\text{H}_2\text{O}$  (0.042 mL, 2.32 mmol),  $\text{KO}^t\text{Bu}$  (1.5 equivalents), and **4b** (0.2 mol %) at  $120^\circ\text{C}$  (Equation 3, Scheme 1).

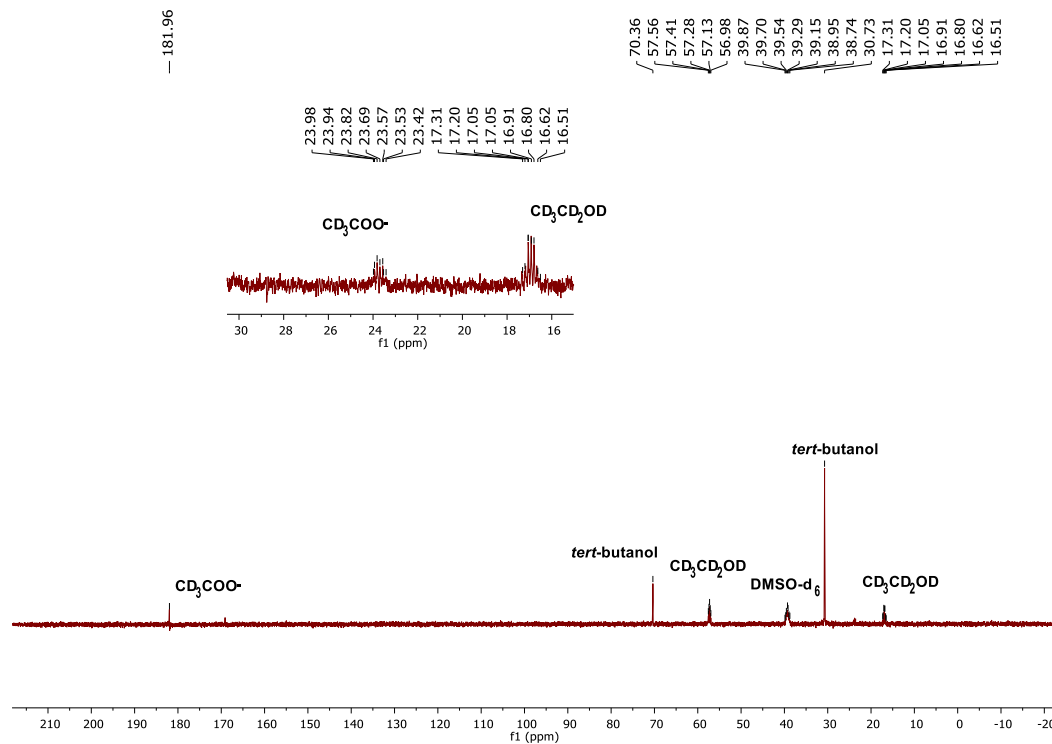

**Figure S7.** <sup>13</sup>C NMR of reaction mixture (in D<sub>2</sub>O) obtained after the reaction. Reaction condition: Ethanol-d<sub>6</sub> (0.271 mL, 4.64 mmol), H<sub>2</sub>O (0.042 mL, 2.32 mmol), KO<sup>t</sup>Bu (1.5 equivalents), and **4b** (0.2 mol %) at 120 °C (Equation 3, Scheme 1).

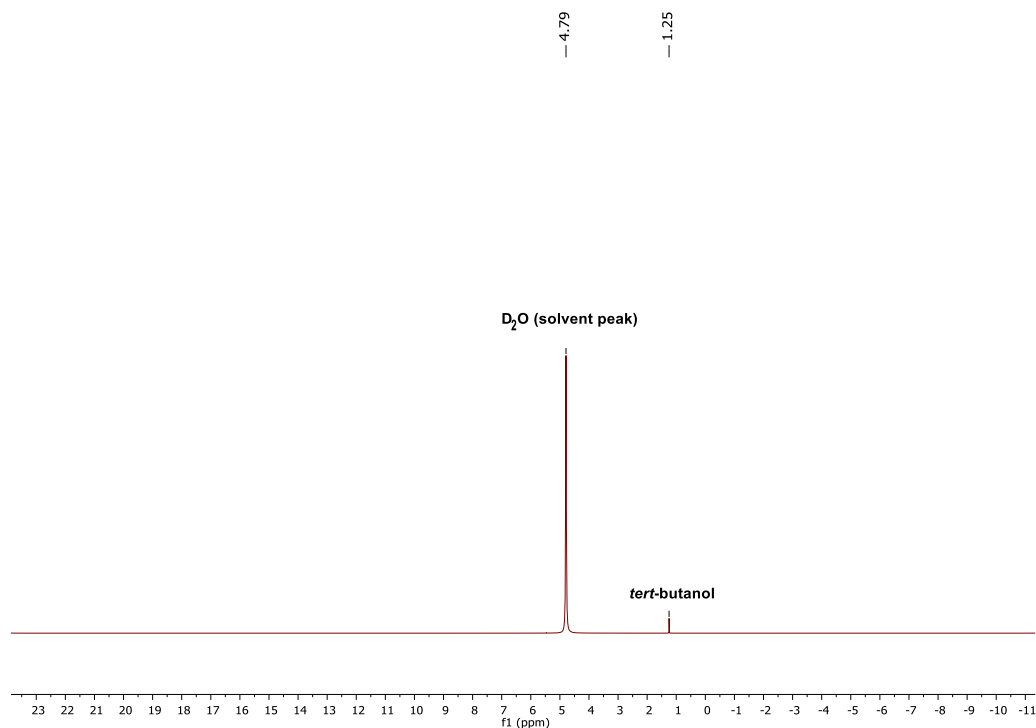

**Figure S8.** <sup>1</sup>H NMR of reaction mixture (in D<sub>2</sub>O) obtained after the reaction. It implies that no deuterium loss has occurred during the reaction. Reaction condition: Ethanol-d<sub>6</sub> (0.271 mL, 4.64 mmol), D<sub>2</sub>O (0.042 mL, 2.32 mmol), KO<sup>t</sup>Bu (1.5 equivalents), and **4b** (0.2 mol %) at 120 °C (Equation 4, Scheme 1).



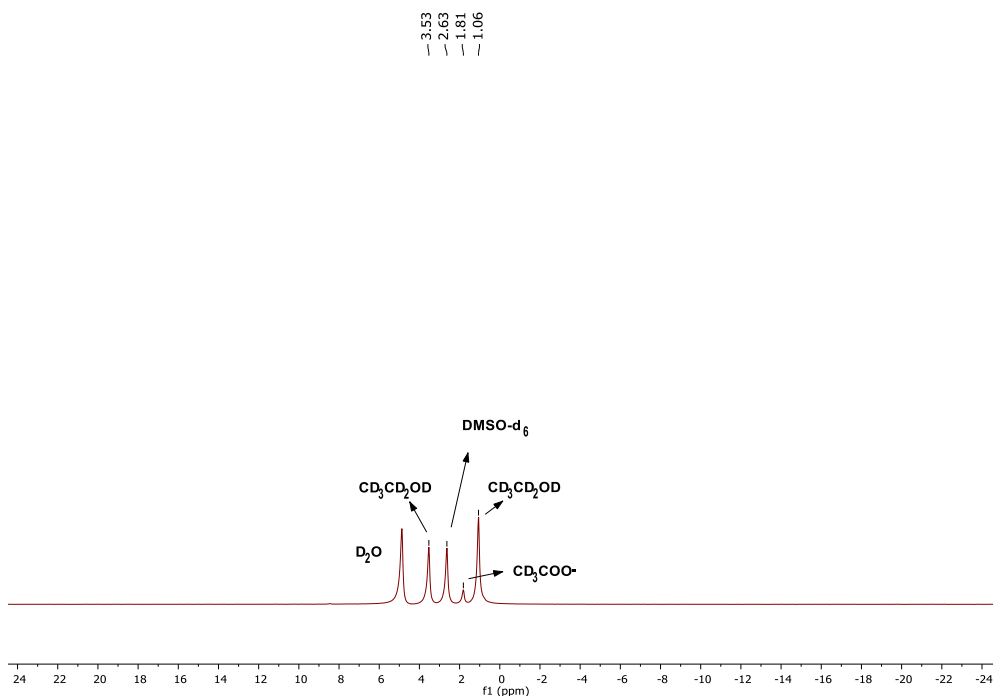

**Figure S9.** <sup>2</sup>H NMR of reaction mixture (in H<sub>2</sub>O) obtained after the reaction. The yield of **3b** was calculated using DMSO-d<sub>6</sub> as an internal standard. Reaction condition: Ethanol-d<sub>6</sub> (0.271 mL, 4.64 mmol), D<sub>2</sub>O (0.042 mL, 2.32 mmol), KO<sup>t</sup>Bu (1.5 equivalents), and **4b** (0.2 mol %) at 120 °C (Equation 4, Scheme 1).

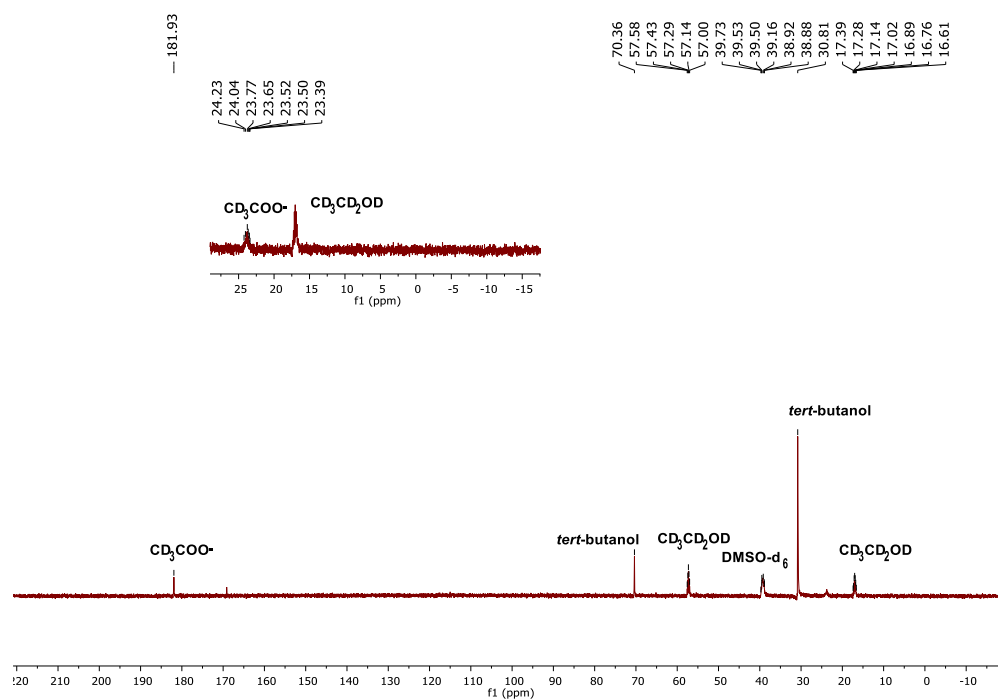

**Figure S10.** <sup>13</sup>C NMR of reaction mixture (in D<sub>2</sub>O) obtained after the reaction. Reaction condition: Ethanol-d<sub>6</sub> (0.271 mL, 4.64 mmol), D<sub>2</sub>O (0.042 mL, 2.32 mmol), KO<sup>t</sup>Bu (1.5 equivalents), and **4b** (0.2 mol %) at 120 °C (Equation 4, Scheme 1).

**$^2\text{H}$  NMR of  $\text{C}_6\text{H}_6$   
purged with  $\text{D}_2$   
evolved from the  
reaction (equation 4,  
Scheme 1)**

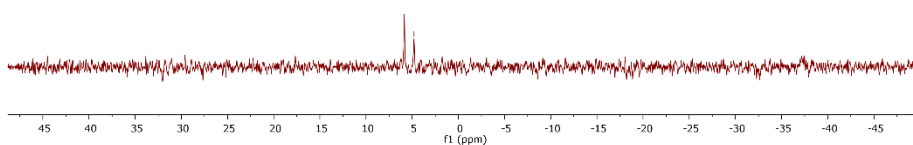

**$^2\text{H}$  NMR of  
pure  $\text{C}_6\text{H}_6$**

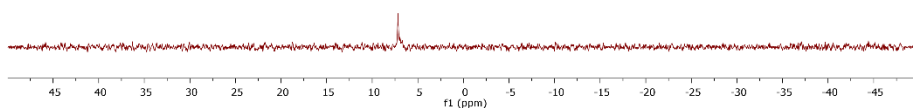

**Figure S11.**  $^2\text{H}$  NMR of the gas collected from the reaction. Reaction conditions: **4b** (0.2 mol%), Ethanol- $\text{d}_6$  (4.64 mmol) with  $\text{D}_2\text{O}$  (2.32 mmol) in the presence of  $\text{KO}^t\text{Bu}$  (3.48 mmol) at  $120\text{ }^\circ\text{C}$  after 36 h (equation 4, Scheme 1). The NMR was recorded in  $\text{C}_6\text{H}_6$ .

#### 4. HRMS analysis of reaction mixture: Comparison of simulated and observed peaks

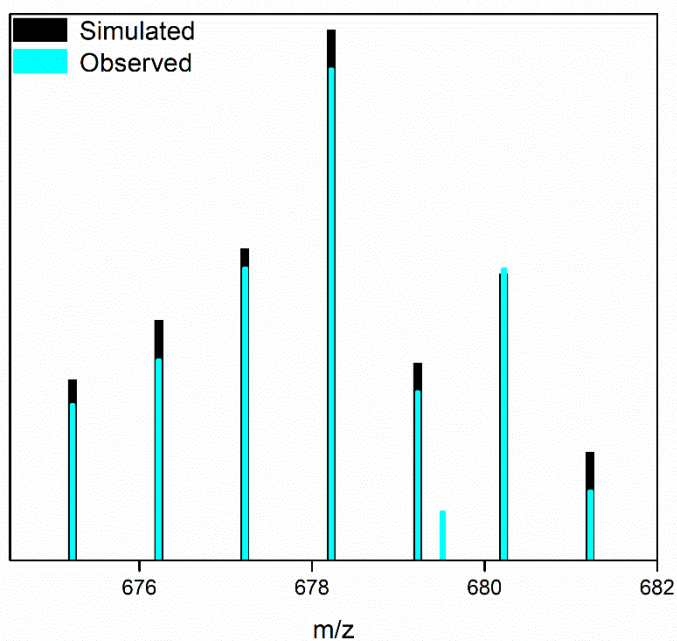

**Figure S12.** Simulated and observed HRMS(ESI) spectra of  $[17b'-Cl]^+$  at  $m/z$  678.2225 .

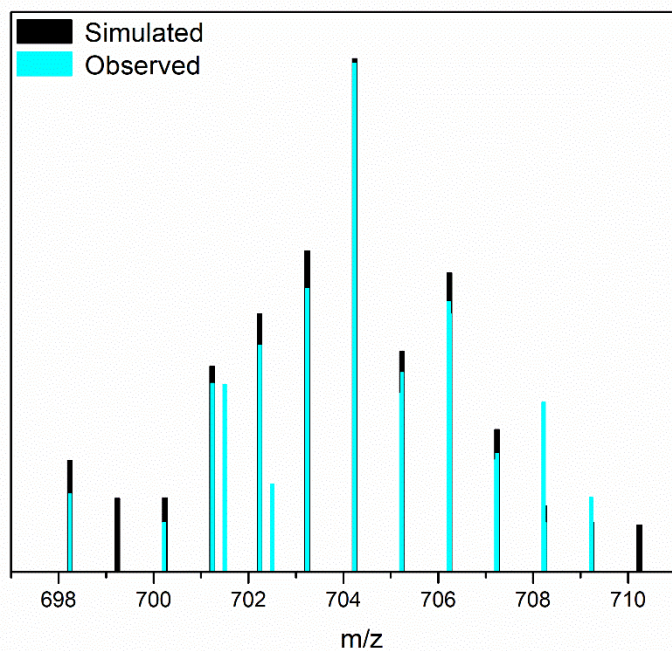

**Figure S13.** Simulated and observed HRMS(ESI) spectra of  $[18b + H_2O + Na]^+$  at  $m/z$  704.2373.

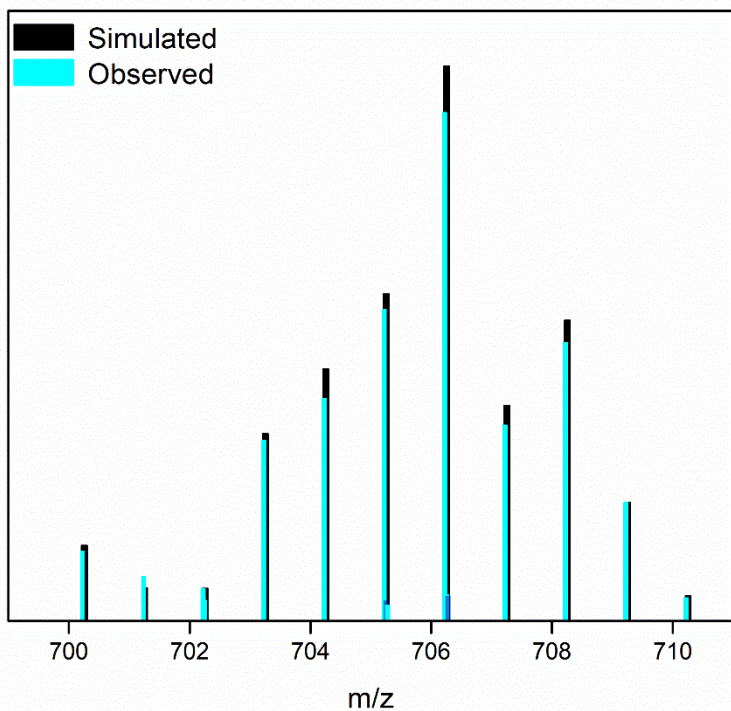

**Figure S14.** Simulated and observed HRMS(ESI) spectra of  $[\mathbf{8b}' - \text{Cl}]^+$  at  $m/z$  706.2208.

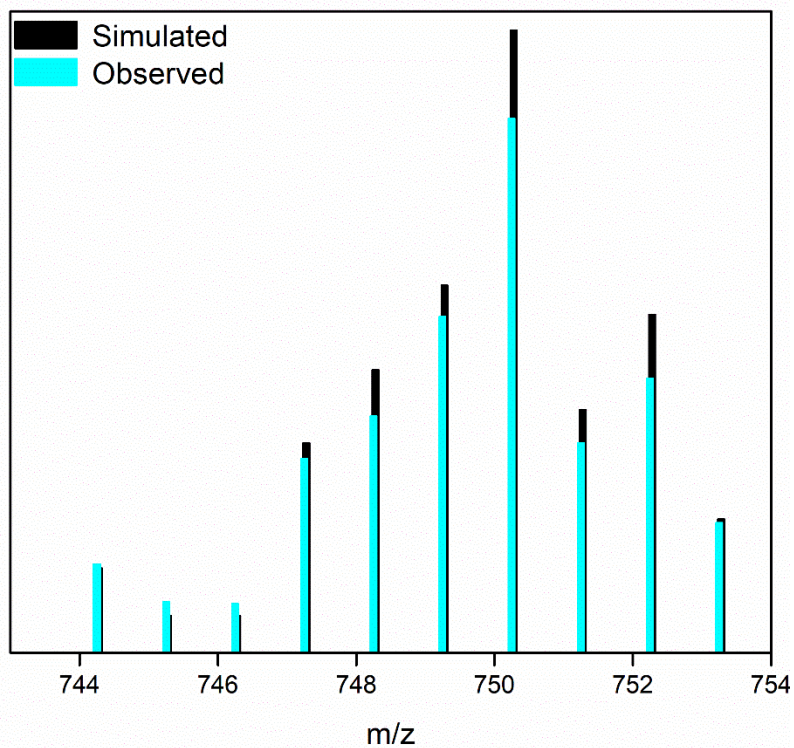

**Figure S15.** Simulated and observed HRMS(ESI) spectra of  $[\mathbf{18b} + \text{CH}_3\text{CH}_2\text{OH} + \text{H}_2\text{O} + \text{Na}^+]$  at  $m/z$  750.2649.

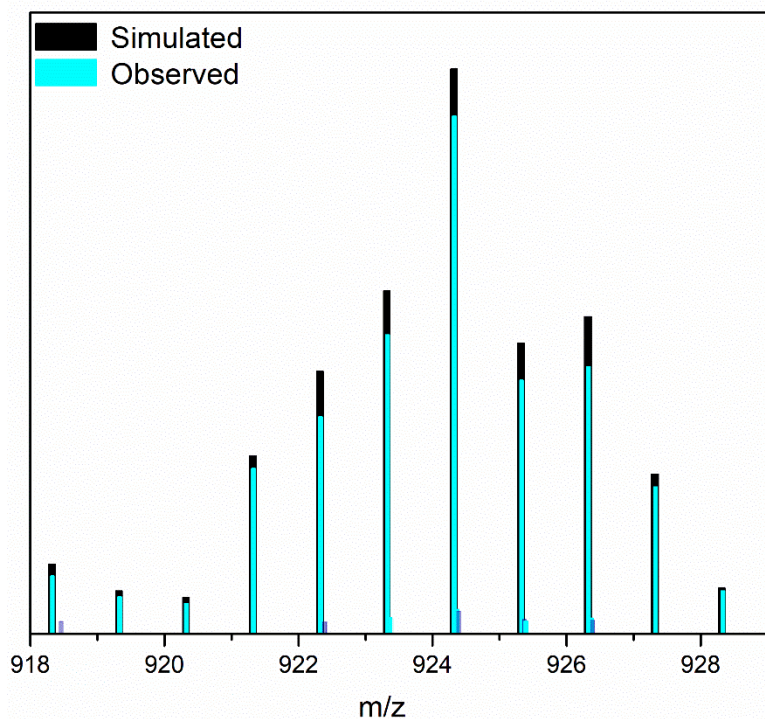

**Figure S16.** Simulated and observed HRMS(ESI) spectra of  $[19b- Cl]^+$  at  $m/z$  924.3252.

## 5. Representative GC spectra

GC analysis (TCD detection) was performed on a Agilent 7820-GC instrument fitted with Agilent Front SS7 inlet N2 HP-PLOT Q column (30 m length x 530  $\mu$ m x 40  $\mu$ m ID) using the following method:

Agilent 7820-GC Detector

TCD starting temperature 40 °C

Oven temperature 70 °C

Time at starting temp: 0 min

Hold time = 5 min

Ramp : 40 °C/min up to 250 °C

Flow rate (carrier): 25 mL/min (N<sub>2</sub>)

Split ratio: 195

Inlet temperature: 40 °C

Detector temperature: TCD: 250

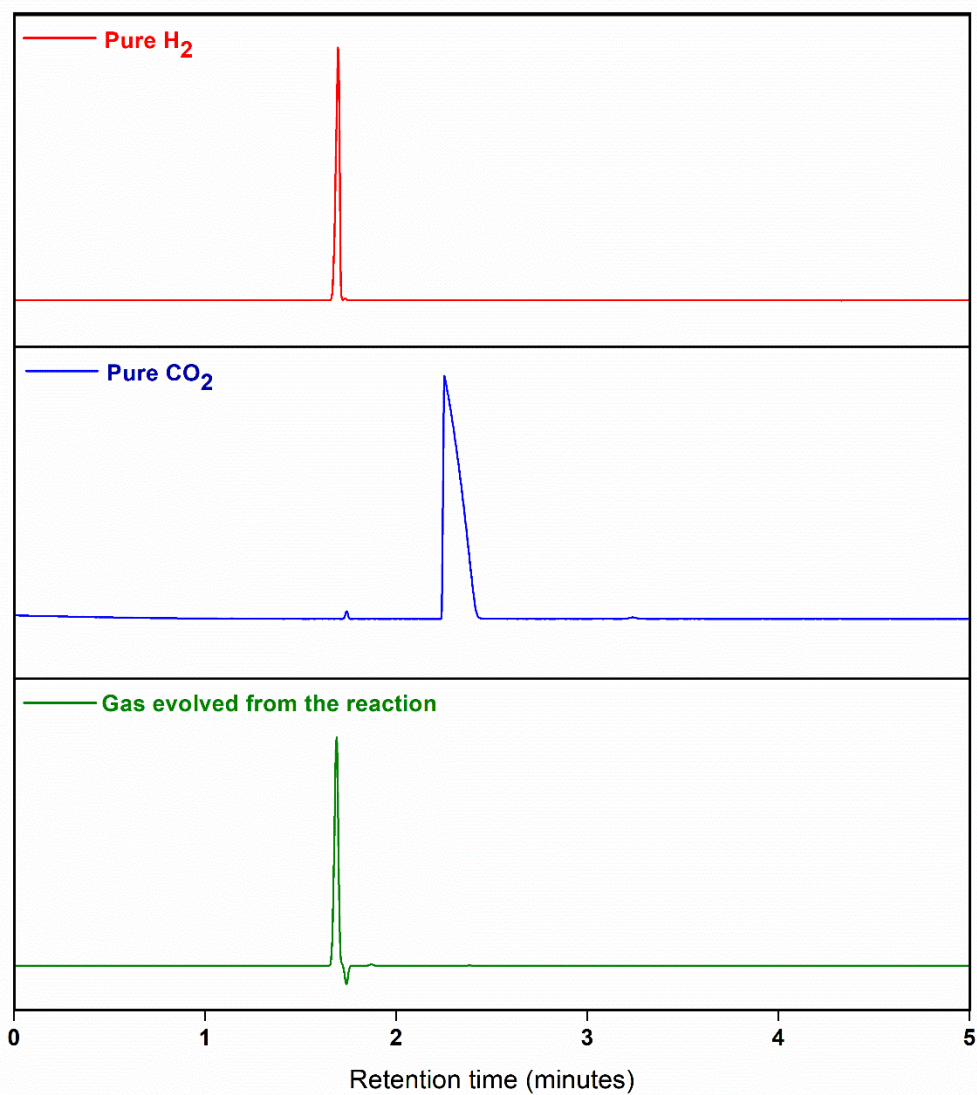

**Figure S17.** GC-TCD analysis of gas evolved from the ethanol reforming reaction along with H<sub>2</sub> and CO<sub>2</sub> gas (as reference sample). Reaction condition: Ethanol (0.271 mL, 4.64 mmol), H<sub>2</sub>O (0.042 mL, 2.32 mmol), KO<sup>t</sup>Bu (1.5 equivalents), and **4b** (0.2 mol %) at 120 °C (Entry 1, Table 3).

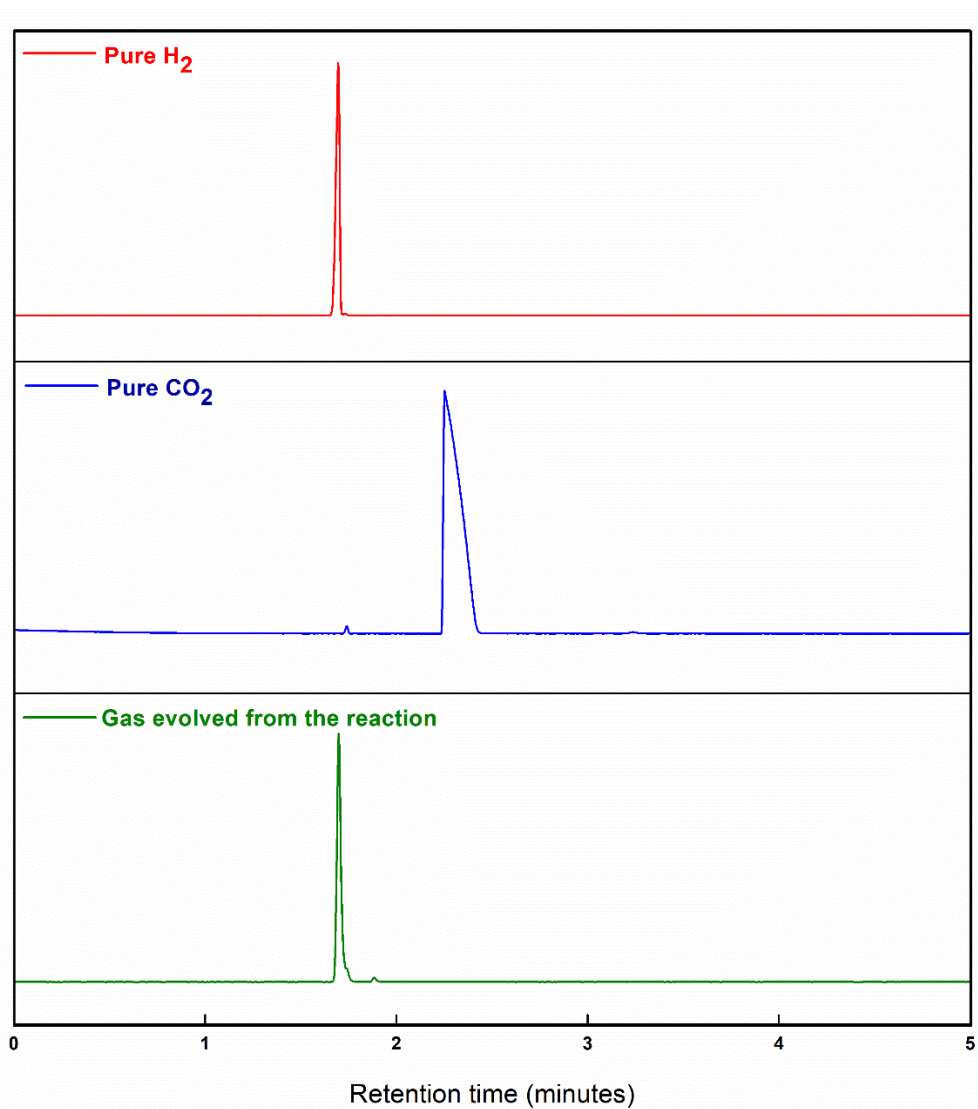

**Figure S18.** GC-TCD analysis of gas evolved from the ethanol reforming reaction along with H<sub>2</sub> and CO<sub>2</sub> gas (as reference sample). Reaction condition: Ethanol (0.271 mL, 4.64 mmol), H<sub>2</sub>O (0.042 mL, 2.32 mmol), KO<sup>t</sup>Bu (1.0 equivalents), and **4b** (0.2 mol %) at 120 °C (Entry 11, Table 1).

## 6. Kinetic Studies: Reaction Profile diagram

The kinetic studies carried out at various catalyst and ethanol concentration for obtaining the rate order dependence are shown below. The reaction was done in a screw cap NMR tube. The concentration of acetic acid formed was analysed with time and plotted as a function of time.

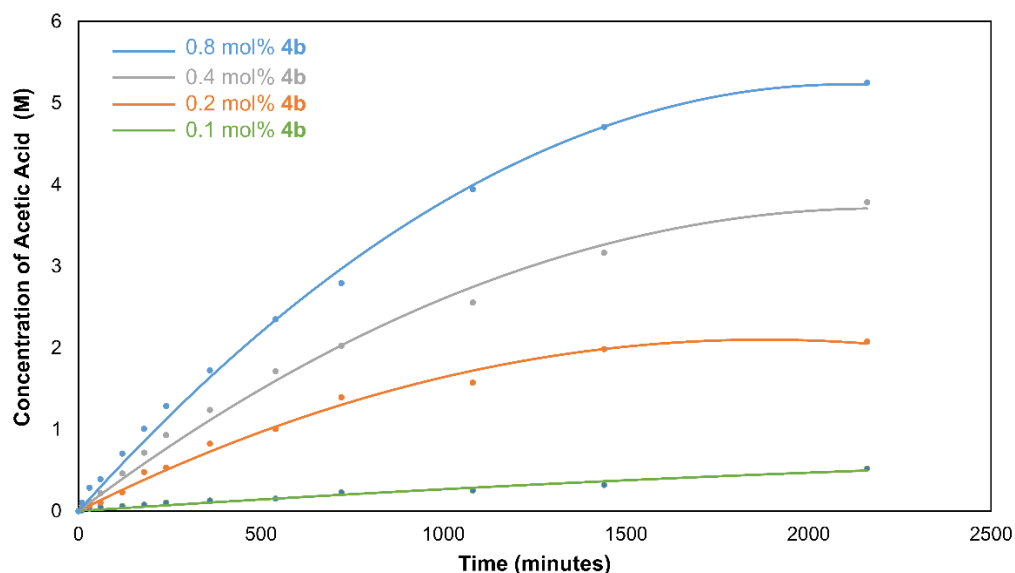

**Figure S19.** Reaction profile of acetic acid formation in the **4b** (0.8 mol%, 0.4 mol%, 0.2 mol% and 0.1 mol%) catalysed reaction of EtOH (7.14 mmol) with D<sub>2</sub>O (3.57 mmol) in the presence of KO<sup>t</sup>Bu (1.78 mmol) at 120 °C. The reactions were performed using 0.5 equiv. of KO<sup>t</sup>Bu rather than 1.5 equiv. for the sake of ease of operation in NMR tube.

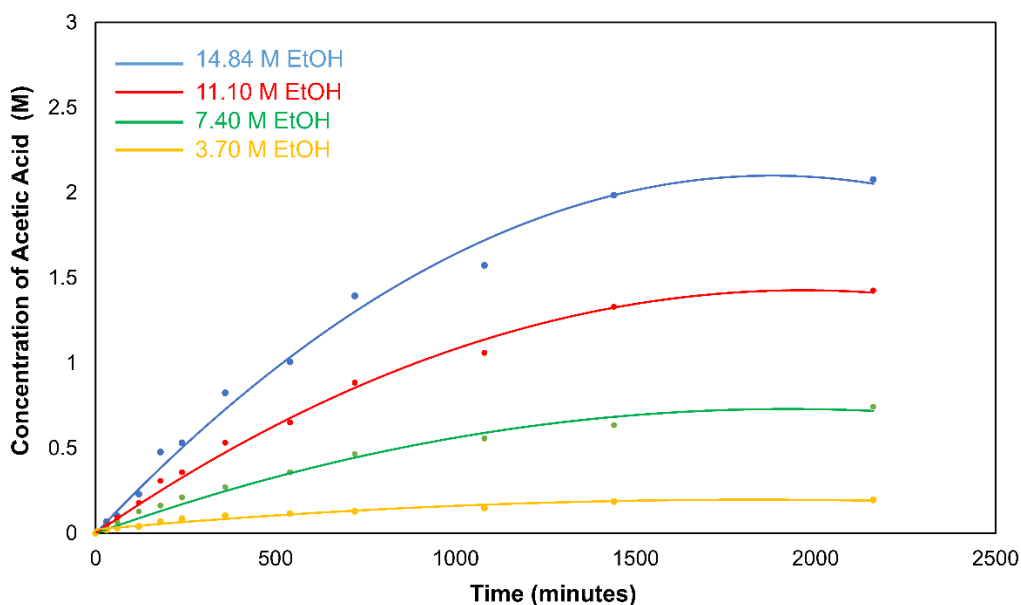

**Figure S20.** Reaction profile of acetic acid formation in the **4b** (0.2 mol%) catalysed reaction of EtOH (1.78 mmol, 3.56 mmol, 5.34 mmol, 7.14 mmol) with D<sub>2</sub>O (3.57 mmol) in the presence of KO<sup>t</sup>Bu (1.78 mmol) at 120 °C. Dioxane was added as a make-up solvent. The reactions were performed using 0.5 equiv. of KO<sup>t</sup>Bu rather than 1.5 equiv. for the sake of ease of operation in NMR tube.



## 7. Kinetic Isotope Studies

The kinetic isotope effect experiment for the hydrogen production evolved in the two parallel reactions from  $\text{CH}_3\text{CH}_2\text{OH}/\text{H}_2\text{O}$  and  $\text{CH}_3\text{CH}_2\text{OH}/\text{D}_2\text{O}$  (equations 1 and 2, Scheme 1).

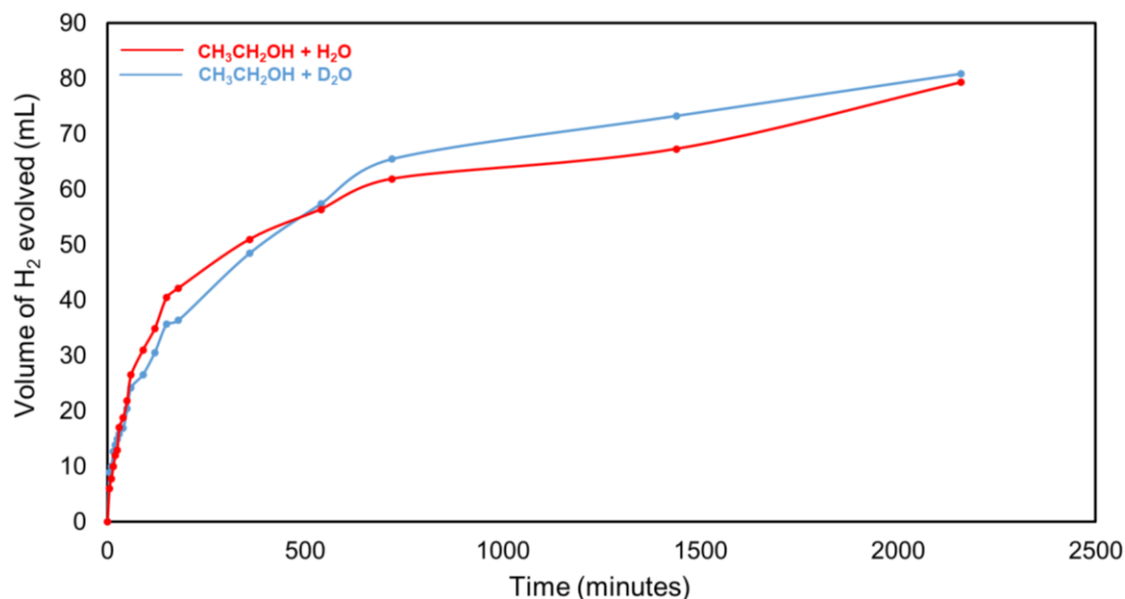

**Figure S21.** Reaction profile of gas evolution from the two parallel reactions in the **4b** (0.2 mol%) catalysed reaction of ethanol (0.271 mL, 4.64 mmol),  $\text{H}_2\text{O}$  (0.042 mL, 2.32 mmol),  $\text{KO}^t\text{Bu}$  (1.5 equivalents), and ethanol (0.271 mL, 4.64 mmol),  $\text{D}_2\text{O}$  (0.042 mL, 2.32 mmol),  $\text{KO}^t\text{Bu}$  (1.5 equivalents).

The kinetic isotope effect experiment for the hydrogen production evolved in the two parallel reactions from  $\text{CH}_3\text{CH}_2\text{OH}/\text{H}_2\text{O}$  and  $\text{CD}_3\text{CD}_2\text{OD}/\text{D}_2\text{O}$  (equations 1 and 4, Scheme 1).

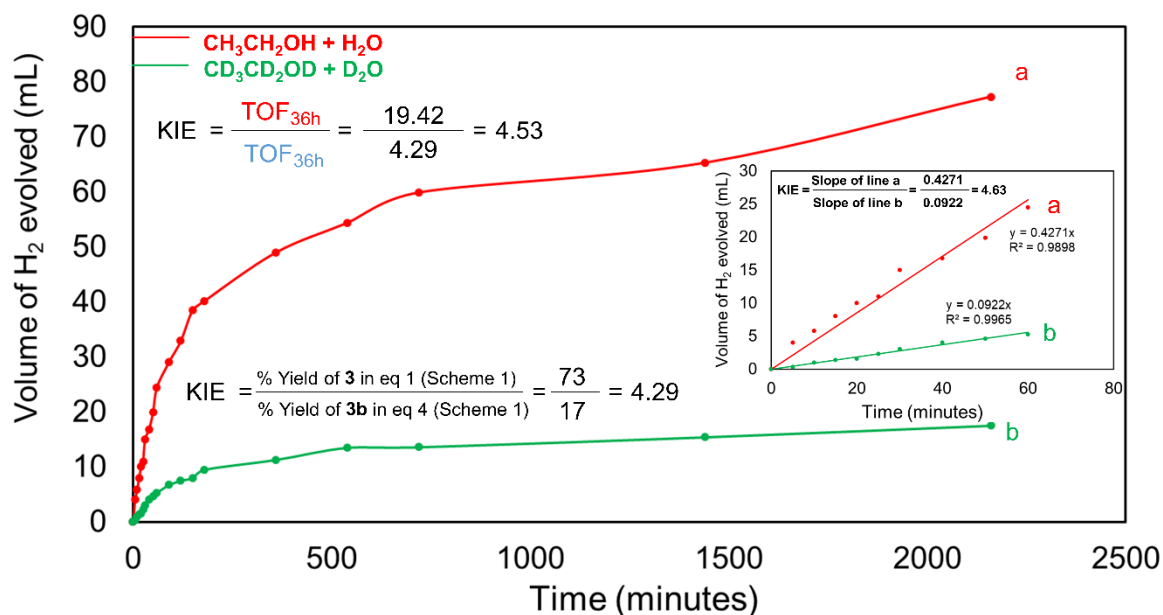

**Figure S22.** Reaction profile of gas evolution from the two parallel reactions in the **4b** (0.2 mol%) catalysed reaction of ethanol (0.271 mL, 4.64 mmol),  $\text{H}_2\text{O}$  (0.042 mL, 2.32 mmol),  $\text{KO}^t\text{Bu}$  (1.5 equivalents), and ethanol- $d_6$  (0.271 mL, 4.64 mmol),  $\text{D}_2\text{O}$  (0.042 mL, 2.32 mmol),  $\text{KO}^t\text{Bu}$  (1.5 equivalents).

## 8. $^{31}\text{P}$ NMR studies

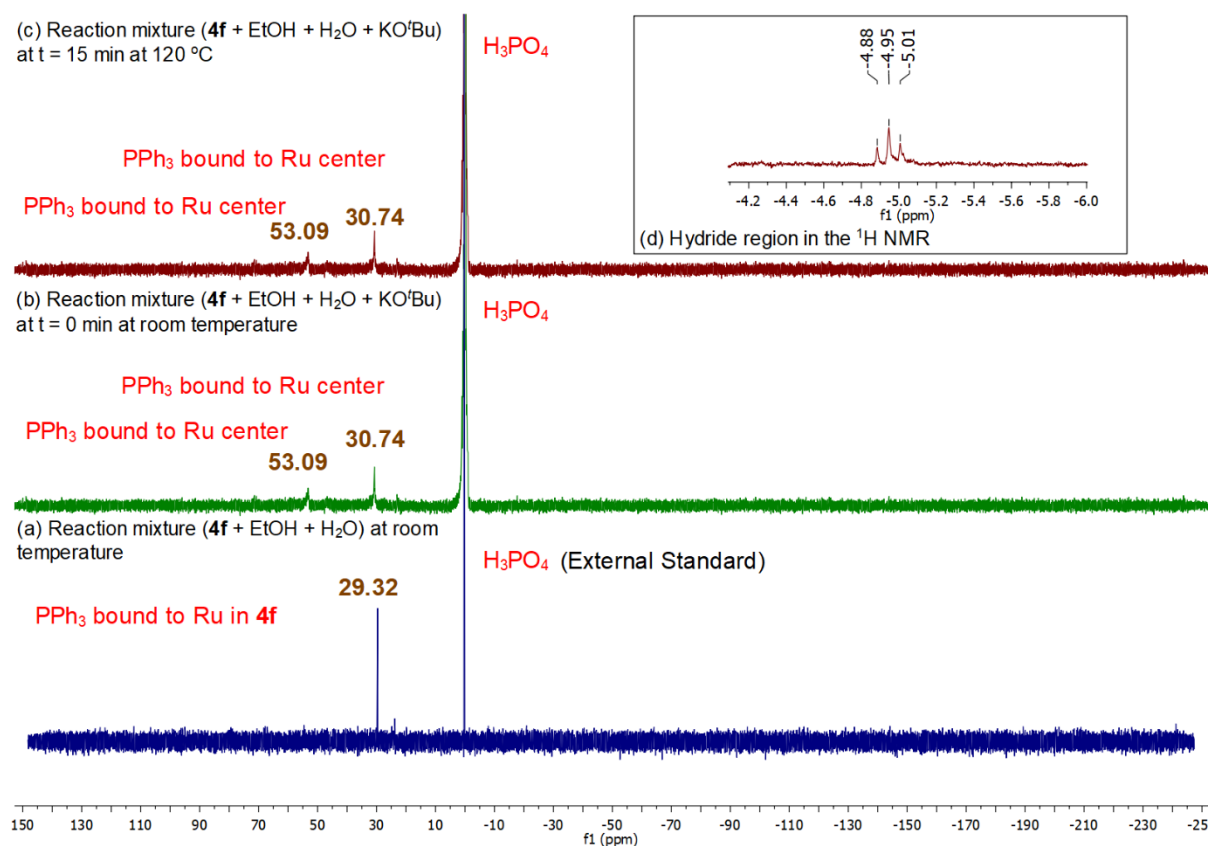

**Figure S23.**  $^{31}\text{P}$  NMR spectra of (a) **4f** (0.8 mol%) in EtOH (4.64 mmol) with water (2.32 mmol) (b) **4f** (0.8 mol%) in EtOH (4.64 mmol) with water (2.32 mmol) in the presence of KO<sup>t</sup>Bu (3.48 mmol) at room temperature. (c) **4f** (0.8 mol%) in EtOH (4.64 mmol) with water (2.32 mmol) in the presence of KO<sup>t</sup>Bu (3.48 mmol) at 120 °C (phosphoric acid was used a  $^{31}\text{P}$  standard). (d) The inset has the region of the corresponding  $^1\text{H}$  NMR at 120 °C for 15 minutes in the presence of KO<sup>t</sup>Bu.

## 9. IR Studies

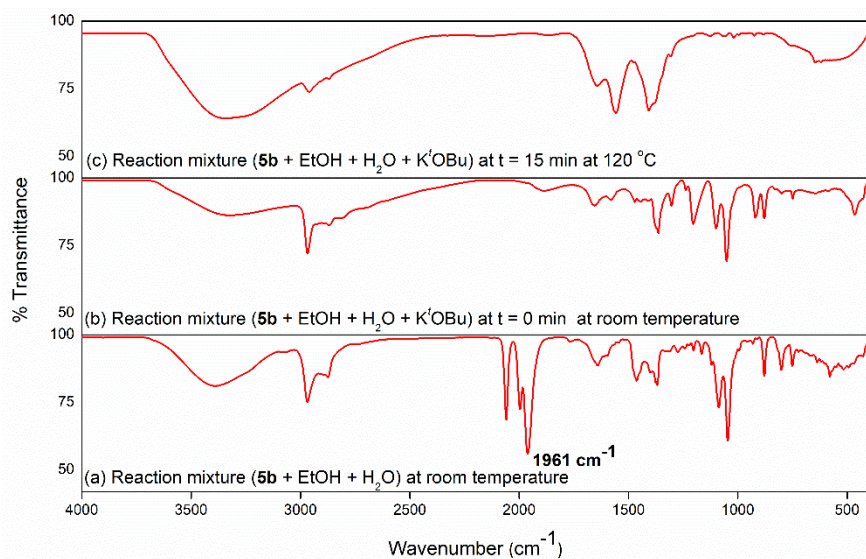

**Figure S24.** IR spectra of (a) **5b** (0.8 mol%) in EtOH (4.64 mmol) with water (2.32 mmol) (b) **5b** (0.8 mol%) in EtOH (4.64 mmol) with water (2.32 mmol) in the presence of KO<sup>+</sup>Bu (3.48 mmol) at room temperature. (c) **5b** (0.8 mol%) in EtOH (4.64 mmol) with water (2.32 mmol) in the presence of KO<sup>+</sup>Bu (3.48 mmol) after 15 min at of heating 120 °C.

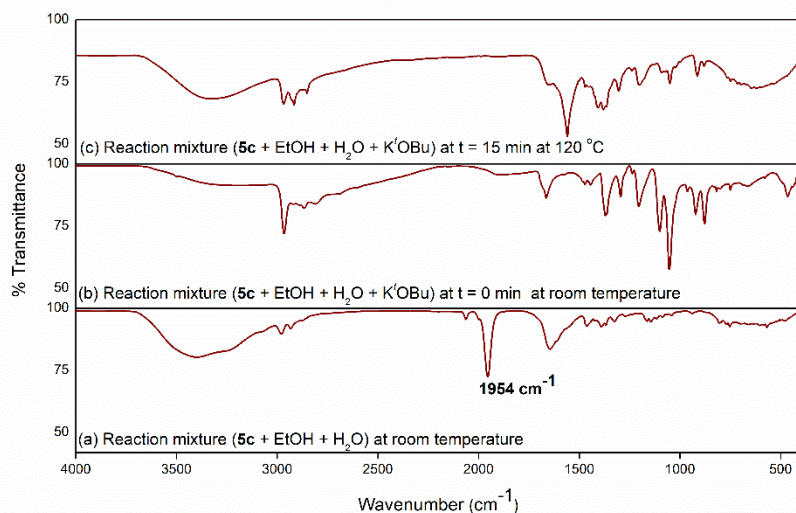

**Figure S25.** IR spectra of (a) **5c** (0.8 mol%) in EtOH (4.64 mmol) with water (2.32 mmol) (b) **5c** (0.8 mol%) in EtOH (4.64 mmol) with water (2.32 mmol) in the presence of KO<sup>+</sup>Bu (3.48 mmol) at room temperature. (c) **5c** (0.8 mol%) in EtOH (4.64 mmol) with water (2.32 mmol) in the presence of KO<sup>+</sup>Bu (3.48 mmol) after 15 min at of heating 120 °C.

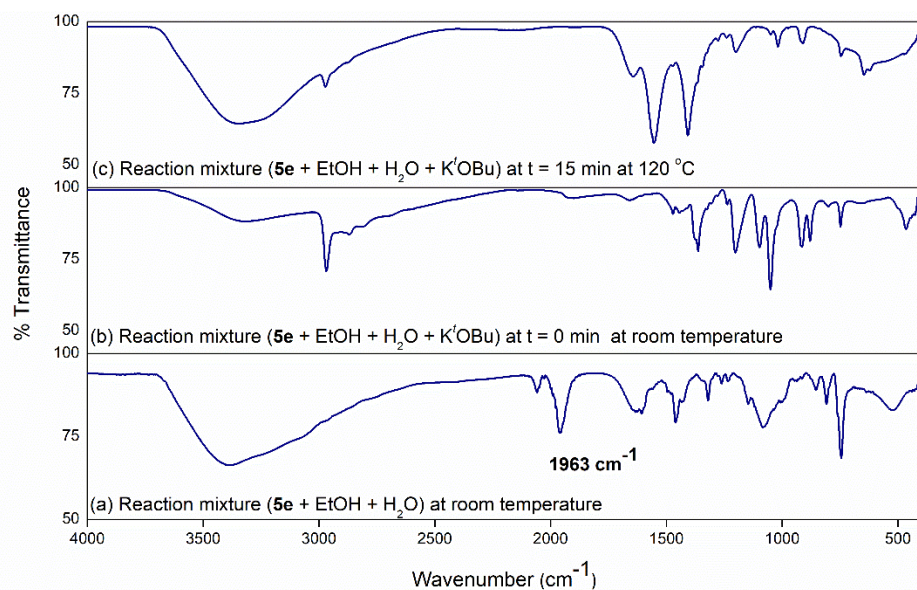

**Figure S26.** IR spectra of (a) **5e** (0.8 mol%) in EtOH (4.64 mmol) with water (2.32 mmol) (b) **5e** (0.8 mol%) in EtOH (4.64 mmol) with water (2.32 mmol) in the presence of KO<sup>t</sup>Bu (3.48 mmol) at room temperature. (c) **5e** (0.8 mol%) in EtOH (4.64 mmol) with water (2.32 mmol) in the presence of KO<sup>t</sup>Bu (3.48 mmol) after 15 min at of heating 120 °C

## 10. Computational Studies

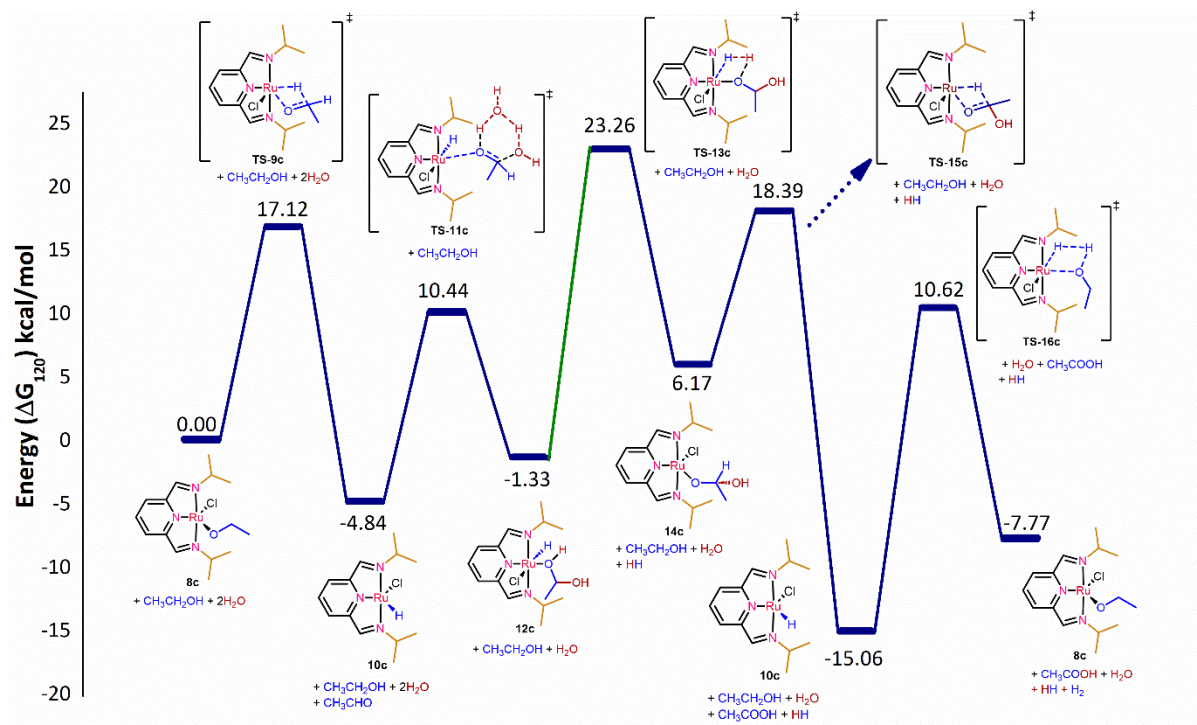

Figure S27. Free energy ( $\Delta G_{120}$ ) profile of the **4c** catalyzed reforming of ethanol at 120 °C.

**Table S4.** Energy barriers of the various species involved in ethanol reforming employing **4b**, **4c** and **5e**.

| Entry | Path                       | Barrier (kcal/mol) |
|-------|----------------------------|--------------------|
| 1     | <b>8b</b> → <b>TS-9b</b>   | 14.08              |
| 2     | <b>8c</b> → <b>TS-9c</b>   | 17.12              |
| 3     | <b>5e</b> → <b>TS-9e</b>   | 10.06              |
| 4     | <b>10b</b> → <b>TS-11b</b> | 13.78              |
| 5     | <b>10c</b> → <b>TS-11c</b> | 15.28              |
| 6     | <b>10e</b> → <b>TS-11e</b> | 13.77              |
| 7     | <b>12b</b> → <b>TS-13b</b> | 23.19              |
| 8     | <b>12c</b> → <b>TS-13c</b> | 24.58              |
| 9     | <b>12e</b> → <b>TS-13e</b> | 24.18              |
| 10    | <b>14b</b> → <b>TS-15b</b> | 9.54               |
| 11    | <b>14c</b> → <b>TS-15c</b> | 12.22              |
| 12    | <b>14e</b> → <b>TS-15e</b> | 0.04               |
| 13    | <b>10b</b> → <b>TS-16b</b> | 23.25              |
| 14    | <b>10c</b> → <b>TS-16c</b> | 25.67              |
| 15    | <b>10e</b> → <b>TS-16e</b> | 23.41              |

**Table S5:** Optimized XYZ coordinates for complex **8b**

|    |             |             |             |
|----|-------------|-------------|-------------|
| Ru | 0.07298800  | -0.01797000 | -0.08929000 |
| N  | -1.97020500 | 0.29679000  | 0.02256100  |
| N  | 0.03187200  | 1.84968300  | 0.14278700  |
| N  | 2.08925100  | 0.39234300  | -0.15985700 |
| C  | -2.28453400 | 1.57362300  | 0.17683500  |
| H  | -3.32122000 | 1.91904800  | 0.22322300  |
| C  | -1.19379300 | 2.49543600  | 0.27220200  |
| C  | 2.35832100  | 1.67735500  | -0.00706700 |
| H  | 3.37434500  | 2.07435800  | -0.07024800 |
| C  | 1.23688200  | 2.54556100  | 0.19652300  |
| C  | -1.21707900 | 3.87989300  | 0.47466800  |
| H  | -2.17930500 | 4.38460800  | 0.57935700  |
| C  | 1.21138900  | 3.93003300  | 0.39683600  |
| H  | 2.15583100  | 4.47599300  | 0.43676400  |
| C  | -0.01382200 | 4.59712700  | 0.53734800  |
| H  | -0.03087700 | 5.67637300  | 0.69428900  |
| Cl | 0.03892600  | -0.28544200 | -2.46482700 |
| O  | 0.26426900  | -0.92920200 | 1.64035000  |
| C  | -0.80642500 | -1.16689000 | 2.53877200  |
| H  | -1.34071400 | -0.22043100 | 2.75519000  |
| H  | -1.55099600 | -1.86672000 | 2.10320800  |
| C  | -0.24027200 | -1.75738500 | 3.82741600  |
| H  | 0.47622000  | -1.05831400 | 4.28374700  |
| H  | -1.04539800 | -1.96303100 | 4.55166200  |
| H  | 0.28729700  | -2.69973600 | 3.61573900  |
| C  | 3.13612400  | -0.59840700 | -0.43271700 |
| C  | 4.43133100  | -0.05895600 | -1.05755700 |
| C  | 3.43809800  | -1.40068600 | 0.85112600  |
| H  | 2.67054200  | -1.28675000 | -1.16356400 |

|   |             |             |             |
|---|-------------|-------------|-------------|
| C | 5.38176900  | -1.22419600 | -1.37837900 |
| H | 4.93808700  | 0.62377100  | -0.35028400 |
| H | 4.19711500  | 0.51785600  | -1.96758500 |
| C | 4.40395000  | -2.55463100 | 0.54754500  |
| H | 3.89098700  | -0.71116400 | 1.58794500  |
| H | 2.49380400  | -1.75665900 | 1.29003500  |
| C | 5.69254200  | -2.05621600 | -0.12461800 |
| H | 6.31203600  | -0.83690700 | -1.82524600 |
| H | 4.91277600  | -1.87175200 | -2.14168000 |
| H | 4.63926800  | -3.09822300 | 1.47732500  |
| H | 3.90182600  | -3.27909500 | -0.12011300 |
| H | 6.34638000  | -2.90566900 | -0.38246000 |
| H | 6.25646200  | -1.43059000 | 0.59257300  |
| C | -3.02915600 | -0.70769900 | -0.17523700 |
| C | -4.18303000 | -0.62918000 | 0.84226600  |
| C | -3.56338200 | -0.65653300 | -1.62118400 |
| H | -2.52688800 | -1.68242700 | -0.03922900 |
| C | -5.17800800 | -1.77523300 | 0.60123000  |
| H | -4.71442600 | 0.33342100  | 0.73418200  |
| H | -3.77877800 | -0.66420800 | 1.86705000  |
| C | -4.57125500 | -1.78858100 | -1.86274200 |
| H | -4.05188900 | 0.32341300  | -1.77711500 |
| H | -2.71455100 | -0.71101700 | -2.31919500 |
| C | -5.71573900 | -1.75848300 | -0.83806500 |
| H | -6.00667900 | -1.71044600 | 1.32522500  |
| H | -4.67073100 | -2.73925200 | 0.79099400  |
| H | -4.96863100 | -1.72027700 | -2.88847300 |
| H | -4.04604200 | -2.75926500 | -1.79667800 |
| H | -6.39997600 | -2.60768500 | -0.99920600 |
| H | -6.31313000 | -0.83985400 | -0.98905700 |



**Table S6:** Optimized XYZ coordinates for complex **TS-9b**

|    |             |             |             |
|----|-------------|-------------|-------------|
| C  | -1.29261300 | 2.52781600  | -0.30497300 |
| C  | -1.37872700 | 3.93371200  | -0.23156200 |
| C  | -0.20320400 | 4.67608600  | -0.10646200 |
| C  | 1.04964300  | 4.03648400  | -0.03357000 |
| C  | 1.08684300  | 2.64111200  | -0.11402800 |
| H  | -2.35341800 | 4.42451300  | -0.24698800 |
| H  | -0.25648600 | 5.76457900  | -0.04276700 |
| H  | 1.96931300  | 4.61034200  | 0.09040000  |
| C  | 2.25487700  | 1.76349000  | -0.06585000 |
| H  | 3.25808900  | 2.20209300  | -0.03315000 |
| C  | -2.34960100 | 1.55052400  | -0.31507300 |
| H  | -3.39921400 | 1.85580600  | -0.28737600 |
| N  | 2.06625900  | 0.47358500  | -0.10345800 |
| N  | -0.06291200 | 1.93935400  | -0.28081800 |
| N  | -2.00012300 | 0.26804500  | -0.26584100 |
| Ru | -0.00168200 | -0.06911700 | -0.19298700 |
| H  | -1.23839600 | -1.78040500 | -1.82994300 |
| C  | -0.14252400 | -1.67928200 | -1.67772400 |
| C  | 0.60366100  | -2.99890800 | -1.72865200 |
| O  | 0.42690400  | -0.60904700 | -2.18301200 |
| Cl | -0.05851900 | 0.16767900  | 2.22514400  |
| H  | 0.04226900  | -1.66758300 | 0.18079700  |
| H  | 1.63223300  | -2.89289100 | -1.35714100 |
| H  | 0.08868900  | -3.77092700 | -1.13830900 |
| H  | 0.64833500  | -3.33566800 | -2.77923600 |
| C  | 3.18525500  | -0.47365400 | -0.15031900 |
| C  | 4.58445400  | 0.11556600  | -0.37304500 |
| C  | 3.15398200  | -1.35286900 | 1.11551500  |
| H  | 2.93901000  | -1.11477100 | -1.01836500 |

|   |             |             |             |
|---|-------------|-------------|-------------|
| C | 5.62123900  | -1.01694200 | -0.48232500 |
| H | 4.85599900  | 0.76693200  | 0.47879500  |
| H | 4.60022900  | 0.73759100  | -1.28461200 |
| C | 4.19671400  | -2.47497900 | 1.02187300  |
| H | 3.35717800  | -0.70935400 | 1.98980800  |
| H | 2.13726800  | -1.74917200 | 1.25426400  |
| C | 5.60412100  | -1.91946500 | 0.75981900  |
| H | 6.62523800  | -0.58920100 | -0.63709200 |
| H | 5.39704200  | -1.62327500 | -1.37929900 |
| H | 4.18242300  | -3.07220700 | 1.94787900  |
| H | 3.91765600  | -3.16259300 | 0.20126500  |
| H | 6.32945400  | -2.74143100 | 0.64247200  |
| H | 5.93176600  | -1.33298200 | 1.63821300  |
| C | -3.05745100 | -0.74524900 | -0.06196500 |
| C | -3.61663700 | -0.66402500 | 1.37181900  |
| C | -4.18386100 | -0.69923300 | -1.11041000 |
| H | -2.54509700 | -1.71584700 | -0.15945500 |
| C | -4.61955700 | -1.79999700 | 1.61546000  |
| H | -4.11803500 | 0.31234000  | 1.50500000  |
| H | -2.77668400 | -0.69596500 | 2.08272100  |
| C | -5.17974200 | -1.84296400 | -0.86030300 |
| H | -4.71835700 | 0.26581600  | -1.04875800 |
| H | -3.75131900 | -0.76367100 | -2.12267900 |
| C | -5.74414000 | -1.79605800 | 0.56829100  |
| H | -5.03761000 | -1.71647400 | 2.63184000  |
| H | -4.08668100 | -2.76811100 | 1.57711900  |
| H | -5.99484700 | -1.79937400 | -1.60108700 |
| H | -4.66534100 | -2.80929400 | -1.01709600 |
| H | -6.42932000 | -2.64355900 | 0.73474600  |
| H | -6.34675800 | -0.87614800 | 0.68781800  |

**Table S7:** Optimized XYZ coordinates for complex **10b**

|    |             |             |             |
|----|-------------|-------------|-------------|
| Ru | 0.00002900  | -0.11848200 | 0.05710400  |
| N  | -2.02940700 | 0.28448100  | 0.03194000  |
| N  | -0.00003500 | 1.82055600  | 0.00324600  |
| N  | 2.02943300  | 0.28464200  | 0.03361300  |
| C  | -2.31740200 | 1.57851900  | -0.01654200 |
| H  | -3.34991100 | 1.94130000  | -0.04271300 |
| C  | -1.20697400 | 2.49725300  | -0.04087900 |
| C  | 2.31736700  | 1.57868900  | -0.01492800 |
| H  | 3.34986400  | 1.94153900  | -0.04046500 |
| C  | 1.20688500  | 2.49733700  | -0.04014100 |
| C  | -1.21667500 | 3.89705500  | -0.11454000 |
| H  | -2.16933100 | 4.42884000  | -0.14834600 |
| C  | 1.21653800  | 3.89713700  | -0.11381700 |
| H  | 2.16917800  | 4.42898600  | -0.14705300 |
| C  | -0.00008300 | 4.59328200  | -0.14591700 |
| H  | -0.00010200 | 5.68307800  | -0.20149000 |
| Cl | 0.00021500  | -2.47833600 | -0.29202700 |
| H  | -0.00064700 | -0.04567100 | 1.62741700  |
| C  | 3.13404900  | -0.69940400 | 0.06230000  |
| C  | 3.95218100  | -0.67863700 | -1.24213700 |
| C  | 4.03887000  | -0.53078800 | 1.29633300  |
| H  | 2.63533500  | -1.67981400 | 0.13161900  |
| C  | 5.03686700  | -1.76621000 | -1.21220900 |
| H  | 4.42569600  | 0.31312900  | -1.36585600 |
| H  | 3.27185100  | -0.82405300 | -2.09664500 |
| C  | 5.12016700  | -1.62224000 | 1.31857000  |
| H  | 4.52346700  | 0.46301400  | 1.27182600  |
| H  | 3.41937700  | -0.56735000 | 2.20700000  |
| C  | 5.94193600  | -1.62309900 | 0.02072300  |

|   |             |             |             |
|---|-------------|-------------|-------------|
| H | 5.63412100  | -1.72565300 | -2.13787800 |
| H | 4.54955900  | -2.75793500 | -1.19531700 |
| H | 5.77684700  | -1.48191500 | 2.19280800  |
| H | 4.63497400  | -2.60722100 | 1.44426000  |
| H | 6.68893000  | -2.43339200 | 0.04222700  |
| H | 6.50759400  | -0.67495500 | -0.05129100 |
| C | -3.13401000 | -0.69958300 | 0.06019000  |
| C | -4.03522500 | -0.53435200 | 1.29735300  |
| C | -3.95587600 | -0.67508200 | -1.24177400 |
| H | -2.63523200 | -1.68024300 | 0.12548300  |
| C | -5.11668500 | -1.62563600 | 1.31962000  |
| H | -4.51946100 | 0.45973700  | 1.27707200  |
| H | -3.41302500 | -0.57369400 | 2.20605100  |
| C | -5.04044300 | -1.76277600 | -1.21175600 |
| H | -4.42995700 | 0.31689000  | -1.36148100 |
| H | -3.27801100 | -0.81803600 | -2.09866700 |
| C | -5.94206500 | -1.62292000 | 0.02407900  |
| H | -5.77089700 | -1.48753900 | 2.19606100  |
| H | -4.63131900 | -2.61103200 | 1.44133600  |
| H | -5.64028600 | -1.71977600 | -2.13563900 |
| H | -4.55308200 | -2.75454100 | -1.19884700 |
| H | -6.68905400 | -2.43321900 | 0.04548300  |
| H | -6.50786700 | -0.67455400 | -0.04383000 |

**Table S8.** Optimized XYZ coordinates for complex **TS-11b**

|    |             |             |             |
|----|-------------|-------------|-------------|
| C  | 0.04538300  | 4.95042600  | 0.50407100  |
| C  | 1.25023900  | 4.23709900  | 0.50104000  |
| C  | 1.23457200  | 2.85677900  | 0.24775900  |
| C  | -1.15862400 | 2.90858800  | 0.02197200  |
| C  | -1.16701900 | 4.28911700  | 0.26436700  |
| C  | 2.33741500  | 1.94512200  | 0.13292400  |
| C  | -2.26738200 | 2.02539100  | -0.22131100 |
| H  | -3.29106200 | 2.40921900  | -0.26626800 |
| H  | 3.37113500  | 2.29964300  | 0.18545000  |
| H  | 0.04970600  | 6.02390000  | 0.70056900  |
| H  | 2.20119500  | 4.73701500  | 0.69316700  |
| H  | -2.11591800 | 4.82806600  | 0.27644300  |
| N  | -1.99175100 | 0.74599600  | -0.38786900 |
| N  | 2.03868200  | 0.67843000  | -0.12262300 |
| N  | 0.03304900  | 2.21789900  | 0.01087800  |
| Ru | 0.03024800  | 0.30678900  | -0.19541500 |
| Cl | -0.28215900 | -0.08700300 | 2.38041400  |
| C  | 0.77807900  | -2.59218600 | 0.63728700  |
| H  | 0.13132100  | 0.27467900  | -1.78702200 |
| O  | 0.17881000  | -1.91864300 | -0.40115500 |
| H  | 1.50094900  | -1.95661000 | 1.17223200  |
| O  | -1.85221600 | -3.15977100 | -0.10085800 |
| H  | -1.88841600 | -4.03176500 | -0.52531800 |
| H  | -0.94293300 | -2.55546000 | -0.50153000 |
| O  | -0.27863800 | -2.88353600 | 1.70931000  |
| H  | -0.43280300 | -1.93097000 | 2.10208000  |
| H  | -1.16558500 | -3.13916100 | 1.03342500  |
| C  | 1.36684900  | -3.93500600 | 0.24256200  |
| H  | 2.17507100  | -3.77040300 | -0.48453400 |

|   |             |             |             |
|---|-------------|-------------|-------------|
| H | 1.77076200  | -4.45904800 | 1.12001200  |
| H | 0.60422500  | -4.56884300 | -0.23463000 |
| C | 3.13768300  | -0.25894300 | -0.42618300 |
| C | 3.95398200  | 0.16805500  | -1.65917000 |
| C | 4.04975200  | -0.50391700 | 0.79063600  |
| H | 2.63789100  | -1.20663300 | -0.68368300 |
| C | 5.01913500  | -0.88889000 | -1.98827100 |
| H | 4.44658600  | 1.13695800  | -1.46018100 |
| H | 3.26791500  | 0.32173100  | -2.50751400 |
| C | 5.11636800  | -1.55891000 | 0.45892200  |
| H | 4.54368800  | 0.44354600  | 1.07327600  |
| H | 3.43783400  | -0.80781200 | 1.65569200  |
| C | 5.93059500  | -1.16266300 | -0.78205900 |
| H | 5.61559200  | -0.56562100 | -2.85710500 |
| H | 4.51609600  | -1.82752500 | -2.28696200 |
| H | 5.78023700  | -1.70768400 | 1.32613200  |
| H | 4.62071900  | -2.53080500 | 0.27556700  |
| H | 6.66318600  | -1.94943600 | -1.02610400 |
| H | 6.51340000  | -0.25045800 | -0.55472000 |
| C | -3.10697100 | -0.19541200 | -0.60172900 |
| C | -3.81068900 | -0.49336100 | 0.73741200  |
| C | -4.12422200 | 0.22933100  | -1.67636200 |
| H | -2.63947200 | -1.13079300 | -0.93930000 |
| C | -4.86702000 | -1.58993600 | 0.55240200  |
| H | -4.28250300 | 0.43775200  | 1.10399500  |
| H | -3.05567300 | -0.78065000 | 1.48476600  |
| C | -5.16398300 | -0.88649600 | -1.86969300 |
| H | -4.64625600 | 1.15485600  | -1.37239600 |
| H | -3.59566500 | 0.44708800  | -2.61923000 |
| C | -5.87462800 | -1.22531300 | -0.54948300 |

|   |             |             |             |
|---|-------------|-------------|-------------|
| H | -5.38937000 | -1.77213600 | 1.50619500  |
| H | -4.34667000 | -2.52646500 | 0.28580100  |
| H | -5.89637200 | -0.59023100 | -2.63876200 |
| H | -4.65362000 | -1.79024800 | -2.25115300 |
| H | -6.59075200 | -2.04970200 | -0.70372400 |
| H | -6.46921000 | -0.34957500 | -0.22708000 |

**Table S9:** Optimized XYZ coordinates for complex **12b**

|    |             |             |             |
|----|-------------|-------------|-------------|
| C  | 0.06199600  | 4.94746000  | 0.24501000  |
| C  | 1.27585000  | 4.24959600  | 0.18987900  |
| C  | 1.26555600  | 2.85665700  | 0.03075900  |
| C  | -1.14623400 | 2.86519100  | -0.00473100 |
| C  | -1.15450100 | 4.25833700  | 0.14968700  |
| C  | 2.37407400  | 1.94671600  | -0.08230100 |
| C  | -2.25437800 | 1.95306200  | -0.09845600 |
| H  | -3.28685500 | 2.31031900  | -0.03211800 |
| H  | 3.40599400  | 2.30627100  | -0.04570000 |
| H  | 0.06402000  | 6.03188400  | 0.36650900  |
| H  | 2.23003900  | 4.77355300  | 0.26853000  |
| H  | -2.10745200 | 4.78795900  | 0.19980800  |
| N  | -1.96131400 | 0.67383600  | -0.25085500 |
| N  | 2.07461500  | 0.67089600  | -0.26169100 |
| N  | 0.05778000  | 2.19183500  | -0.07074400 |
| Ru | 0.06404700  | 0.29520500  | -0.27183800 |
| Cl | -0.04777700 | -0.41360600 | 2.18696000  |
| O  | -1.15133500 | -2.88593200 | 0.85855400  |
| C  | 0.05119100  | -2.99709100 | 0.17956400  |
| H  | 0.91374400  | -2.81247100 | 0.84196400  |
| H  | 0.07084500  | 0.37084200  | -1.87866700 |
| H  | -1.02467100 | -2.10740500 | 1.47102200  |
| O  | 0.20417300  | -1.92015000 | -0.82279700 |
| H  | -0.47727700 | -2.06323000 | -1.50461100 |
| C  | 0.12877700  | -4.34278500 | -0.51388500 |
| H  | 1.05117900  | -4.42421100 | -1.10498600 |
| H  | 0.10691300  | -5.14471500 | 0.23692800  |
| H  | -0.74177500 | -4.47671900 | -1.17662200 |
| C  | 3.13566600  | -0.34192700 | -0.38354200 |



|   |             |             |             |
|---|-------------|-------------|-------------|
| C | 4.35950300  | 0.08503900  | -1.20974100 |
| C | 3.55800200  | -0.83070500 | 1.01694100  |
| H | 2.65134800  | -1.18634500 | -0.90448700 |
| C | 5.34215800  | -1.09057300 | -1.33769100 |
| H | 4.87940900  | 0.92544600  | -0.71534600 |
| H | 4.03355900  | 0.43931500  | -2.20175100 |
| C | 4.55266200  | -1.99464400 | 0.89972600  |
| H | 4.02594700  | 0.01494400  | 1.55447300  |
| H | 2.66083200  | -1.10840500 | 1.59247800  |
| C | 5.76988600  | -1.61447500 | 0.04205100  |
| H | 6.22356500  | -0.78267300 | -1.92380400 |
| H | 4.85798000  | -1.90693600 | -1.90529500 |
| H | 4.87253900  | -2.31560100 | 1.90449700  |
| H | 4.04105800  | -2.86240800 | 0.44217200  |
| H | 6.44683400  | -2.47745300 | -0.06968800 |
| H | 6.34642900  | -0.82767000 | 0.56349700  |
| C | -3.05381200 | -0.31699300 | -0.29036600 |
| C | -3.84614800 | -0.35664700 | 1.02959700  |
| C | -3.98413300 | -0.12986600 | -1.50210600 |
| H | -2.55275300 | -1.29338800 | -0.38699100 |
| C | -4.89146500 | -1.48084700 | 0.98216500  |
| H | -4.35011800 | 0.61488000  | 1.18587300  |
| H | -3.14169100 | -0.49416800 | 1.86473200  |
| C | -5.03516100 | -1.25061400 | -1.54236300 |
| H | -4.49264900 | 0.84911300  | -1.43043900 |
| H | -3.38366400 | -0.11221900 | -2.42684200 |
| C | -5.82634900 | -1.32662700 | -0.22723800 |
| H | -5.47153700 | -1.49356700 | 1.91928900  |
| H | -4.36693400 | -2.45196800 | 0.92309400  |
| H | -5.71568600 | -1.09875000 | -2.39631700 |

|   |             |             |             |
|---|-------------|-------------|-------------|
| H | -4.52570500 | -2.21696700 | -1.71441400 |
| H | -6.54672900 | -2.16033900 | -0.26457400 |
| H | -6.42170800 | -0.40153300 | -0.11043800 |

**Table S10:** Optimized XYZ coordinates for complex **TS-13b**

|    |             |             |             |
|----|-------------|-------------|-------------|
| C  | -0.18779200 | 4.95193300  | 0.13090400  |
| C  | 1.04595100  | 4.28712600  | 0.11915000  |
| C  | 1.06659900  | 2.89300300  | -0.02780900 |
| C  | -1.33301500 | 2.83680100  | -0.12557800 |
| C  | -1.38410800 | 4.23114900  | 0.01445500  |
| C  | 2.20030900  | 1.99792500  | -0.08093400 |
| C  | -2.42661400 | 1.89675000  | -0.23734100 |
| H  | -3.46252500 | 2.24537200  | -0.26497600 |
| H  | 3.22112000  | 2.39044100  | -0.05021900 |
| H  | -0.21813300 | 6.03652100  | 0.24757600  |
| H  | 1.98267600  | 4.83454600  | 0.23623500  |
| H  | -2.35066200 | 4.73662300  | 0.04861400  |
| N  | -2.11301800 | 0.62092300  | -0.33038600 |
| N  | 1.95230800  | 0.71280800  | -0.21084500 |
| N  | -0.11222500 | 2.20948900  | -0.16782400 |
| Ru | -0.09132100 | 0.27129900  | -0.22920200 |
| Cl | -0.11228700 | 0.18048000  | 2.18102200  |
| O  | 1.59815200  | -3.04696400 | -1.07480800 |
| C  | 0.56353400  | -2.79820200 | -0.09699900 |
| H  | 1.11588400  | -2.39967800 | 0.77328500  |
| H  | 0.00608500  | -0.00410000 | -1.95663400 |
| H  | 1.14343300  | -3.42243300 | -1.85003900 |
| O  | -0.38955500 | -1.88807000 | -0.55410500 |
| H  | -0.03553300 | -0.87700200 | -1.57907500 |
| C  | -0.15492100 | -4.09401300 | 0.27575300  |
| H  | 0.56826500  | -4.85985400 | 0.59250500  |
| H  | -0.86879800 | -3.90860200 | 1.09114300  |
| H  | -0.71936300 | -4.46442600 | -0.59624800 |
| C  | -3.13382800 | -0.43298000 | -0.43111900 |

|   |             |             |             |
|---|-------------|-------------|-------------|
| C | -3.27591600 | -1.12498100 | 0.94088000  |
| C | -4.50056300 | -0.00022700 | -0.97709900 |
| H | -2.69007800 | -1.18152200 | -1.11178800 |
| C | -4.21309800 | -2.33452200 | 0.82949700  |
| H | -3.67157400 | -0.39145400 | 1.66676100  |
| H | -2.27835300 | -1.42054000 | 1.29203300  |
| C | -5.42528300 | -1.22405600 | -1.10127900 |
| H | -4.97248200 | 0.72566300  | -0.28919000 |
| H | -4.38103600 | 0.50087700  | -1.95311300 |
| C | -5.57942600 | -1.94750400 | 0.24553100  |
| H | -4.33487600 | -2.80018800 | 1.82111500  |
| H | -3.73706400 | -3.09395200 | 0.18195700  |
| H | -6.40903100 | -0.91203200 | -1.48877800 |
| H | -5.00097000 | -1.92291200 | -1.84560200 |
| H | -6.21652700 | -2.83945500 | 0.12623200  |
| H | -6.10228200 | -1.27989400 | 0.95575300  |
| C | 3.05965100  | -0.25308500 | -0.29759100 |
| C | 4.29064800  | 0.21162700  | -1.09168600 |
| C | 3.46656200  | -0.70828300 | 1.11973100  |
| H | 2.63428700  | -1.12859600 | -0.81508500 |
| C | 5.29289800  | -0.95005000 | -1.20290300 |
| H | 4.78838700  | 1.05831700  | -0.58375200 |
| H | 3.98190600  | 0.56238000  | -2.09113100 |
| C | 4.47388700  | -1.86356700 | 1.02139500  |
| H | 3.91419100  | 0.15237500  | 1.65168000  |
| H | 2.56703100  | -0.99246400 | 1.68696200  |
| C | 5.70137700  | -1.46870700 | 0.18491400  |
| H | 6.18096900  | -0.62734400 | -1.77100600 |
| H | 4.82814200  | -1.77153100 | -1.77755900 |
| H | 4.78142400  | -2.17812900 | 2.03214300  |

|   |            |             |            |
|---|------------|-------------|------------|
| H | 3.97260200 | -2.72950100 | 0.55290100 |
| H | 6.38768600 | -2.32547600 | 0.08301600 |
| H | 6.26286100 | -0.67644100 | 0.71524800 |

**Table S11:** Optimized XYZ coordinates for complex **14b**

|    |             |             |             |
|----|-------------|-------------|-------------|
| Ru | 0.10418100  | -0.06005900 | -0.19443900 |
| N  | -1.93923200 | 0.25532600  | -0.15684600 |
| N  | 0.05862700  | 1.81791800  | -0.13882500 |
| N  | 2.12449300  | 0.34561000  | -0.28209400 |
| C  | -2.25678900 | 1.53487500  | -0.11194400 |
| H  | -3.29345800 | 1.88114900  | -0.09208300 |
| C  | -1.16812500 | 2.46659800  | -0.08703300 |
| C  | 2.38681600  | 1.63876300  | -0.23809300 |
| H  | 3.40250700  | 2.03404700  | -0.31829300 |
| C  | 1.25903700  | 2.51909900  | -0.13496400 |
| C  | -1.19909000 | 3.86289300  | -0.02055600 |
| H  | -2.16452100 | 4.36997700  | 0.02374700  |
| C  | 1.22898300  | 3.91753100  | -0.06981800 |
| H  | 2.17194900  | 4.46745600  | -0.06973400 |
| C  | 0.00106700  | 4.58936000  | -0.01079900 |
| H  | -0.02201000 | 5.67863300  | 0.04070600  |
| Cl | 0.11519900  | -0.63750200 | -2.51471100 |
| O  | 0.29312000  | -0.65255800 | 1.69234900  |
| C  | -0.76124600 | -0.62470700 | 2.61050000  |
| H  | -1.68069800 | -1.09735300 | 2.21095100  |
| O  | -1.16712100 | 0.71691200  | 2.89768700  |
| H  | -0.34525200 | 1.18932500  | 3.12354000  |
| C  | -0.29972800 | -1.35819200 | 3.87052800  |
| H  | -1.08441700 | -1.31972800 | 4.63999700  |
| H  | -0.06491100 | -2.40821600 | 3.64169300  |
| H  | 0.61232900  | -0.87818800 | 4.25958200  |
| C  | 3.18113300  | -0.66068300 | -0.43737000 |
| C  | 4.50114400  | -0.16226100 | -1.04301900 |
| C  | 3.42845700  | -1.36036300 | 0.91669000  |

|   |             |             |             |
|---|-------------|-------------|-------------|
| H | 2.74728300  | -1.40245100 | -1.13470300 |
| C | 5.47065600  | -1.34072400 | -1.23089300 |
| H | 4.97252300  | 0.57574800  | -0.36740400 |
| H | 4.30680900  | 0.34227100  | -2.00403400 |
| C | 4.41228800  | -2.52712700 | 0.74708500  |
| H | 3.84389300  | -0.61208400 | 1.61736000  |
| H | 2.46849400  | -1.68793600 | 1.34296100  |
| C | 5.72713500  | -2.07162500 | 0.09590500  |
| H | 6.41866100  | -0.98097600 | -1.66315200 |
| H | 5.04035400  | -2.04830600 | -1.96307100 |
| H | 4.60837700  | -2.99489900 | 1.72587300  |
| H | 3.94347000  | -3.30493000 | 0.11640100  |
| H | 6.39432100  | -2.93411100 | -0.06689200 |
| H | 6.25759300  | -1.39024400 | 0.78734900  |
| C | -2.99544400 | -0.76722600 | -0.24957000 |
| C | -4.18318800 | -0.55555400 | 0.70763600  |
| C | -3.48062600 | -0.91520000 | -1.70583200 |
| H | -2.50030200 | -1.71457000 | 0.03220900  |
| C | -5.15692200 | -1.73936100 | 0.59941100  |
| H | -4.72271200 | 0.37072500  | 0.43978500  |
| H | -3.81592900 | -0.42626200 | 1.73859100  |
| C | -4.47404400 | -2.07889800 | -1.82362700 |
| H | -3.96559100 | 0.03185300  | -2.00801600 |
| H | -2.61009900 | -1.05775200 | -2.36335500 |
| C | -5.64886100 | -1.92925500 | -0.84422900 |
| H | -6.00955600 | -1.58628100 | 1.28099500  |
| H | -4.64705500 | -2.66042900 | 0.93826400  |
| H | -4.84194800 | -2.15048800 | -2.86010000 |
| H | -3.94303700 | -3.02639900 | -1.61641700 |
| H | -6.31692800 | -2.80395200 | -0.90782700 |

H      -6.25358800 -1.04997100 -1.13549100



**Table S12:** Optimized XYZ coordinates for complex **TS-15b**

|    |             |             |             |
|----|-------------|-------------|-------------|
| C  | -0.03698100 | 4.66413800  | -0.48254100 |
| C  | 1.18526800  | 3.98333200  | -0.43893400 |
| C  | 1.17498800  | 2.58020900  | -0.32134200 |
| C  | -1.21861000 | 2.57098300  | -0.28347300 |
| C  | -1.25513800 | 3.96772000  | -0.40295400 |
| C  | 2.28295000  | 1.65786800  | -0.21303800 |
| C  | -2.32242900 | 1.63263700  | -0.14506100 |
| H  | -3.35307300 | 2.00190700  | -0.08865900 |
| H  | 3.31233700  | 2.02534600  | -0.16469200 |
| H  | -0.04435100 | 5.75215000  | -0.57158500 |
| H  | 2.13154300  | 4.52527800  | -0.48379900 |
| H  | -2.20881000 | 4.49760600  | -0.42531400 |
| N  | -2.04450300 | 0.35186000  | -0.05615800 |
| N  | 2.00470300  | 0.36334400  | -0.12007200 |
| N  | -0.02033400 | 1.92715800  | -0.26305000 |
| Ru | -0.00024500 | -0.06817000 | -0.11498200 |
| Cl | -0.03426400 | 0.00979500  | 2.29612000  |
| O  | 1.45919600  | -2.07287800 | -2.10803600 |
| C  | 0.16361800  | -1.67313100 | -1.88620900 |
| H  | 0.02623200  | -1.71881900 | 0.09583000  |
| H  | 1.95839400  | -1.24614200 | -2.26039200 |
| O  | -0.18680900 | -0.48847000 | -2.22670700 |
| C  | -0.78613800 | -2.84537600 | -1.96284000 |
| H  | -0.88457700 | -3.12636800 | -3.02531000 |
| H  | -0.39873900 | -3.70508600 | -1.40376400 |
| H  | -1.76977900 | -2.55896000 | -1.57694700 |
| C  | -3.13546500 | -0.60906800 | 0.19694600  |
| C  | -3.76887000 | -0.38763200 | 1.58351300  |
| C  | -4.19761600 | -0.62917100 | -0.91752100 |

|   |             |             |             |
|---|-------------|-------------|-------------|
| H | -2.63970900 | -1.59253000 | 0.21932300  |
| C | -4.81852200 | -1.47175300 | 1.86400400  |
| H | -4.24771400 | 0.60876200  | 1.60985500  |
| H | -2.96767000 | -0.38691200 | 2.33844400  |
| C | -5.24536600 | -1.71517200 | -0.62806400 |
| H | -4.69655000 | 0.35572800  | -0.97301600 |
| H | -3.70588600 | -0.79459300 | -1.89030000 |
| C | -5.88345100 | -1.52798400 | 0.75746500  |
| H | -5.28909900 | -1.29205800 | 2.84431400  |
| H | -4.31275600 | -2.45224100 | 1.93650100  |
| H | -6.01768700 | -1.71062500 | -1.41455300 |
| H | -4.75852300 | -2.70723800 | -0.67367200 |
| H | -6.60320400 | -2.33874700 | 0.95730900  |
| H | -6.46282200 | -0.58553200 | 0.76341700  |
| C | 3.10543900  | -0.58744300 | 0.15236500  |
| C | 4.32163400  | -0.44157900 | -0.78092700 |
| C | 3.53366300  | -0.51225300 | 1.63019700  |
| H | 2.66411400  | -1.58238700 | -0.01733800 |
| C | 5.34634500  | -1.54710300 | -0.48080000 |
| H | 4.79983400  | 0.54357400  | -0.63391900 |
| H | 4.00540200  | -0.48093900 | -1.83895700 |
| C | 4.57059100  | -1.60241100 | 1.93623900  |
| H | 3.96548800  | 0.48740800  | 1.82439600  |
| H | 2.63937000  | -0.60775200 | 2.26442000  |
| C | 5.78070000  | -1.51935700 | 0.99307600  |
| H | 6.22020500  | -1.44002300 | -1.14419100 |
| H | 4.89258300  | -2.52818300 | -0.71222000 |
| H | 4.89375200  | -1.52449500 | 2.98707200  |
| H | 4.09107100  | -2.59275500 | 1.82968200  |
| H | 6.48499000  | -2.34286600 | 1.19618000  |

H            6.33108900 -0.57999400 1.18937400

**Table S13:** Optimized XYZ coordinates for complex **TS-16b**

|    |             |             |             |
|----|-------------|-------------|-------------|
| C  | 0.04043000  | 4.86733200  | 0.12695800  |
| C  | 1.24937900  | 4.16135400  | 0.07338200  |
| C  | 1.21737100  | 2.76780700  | -0.08081600 |
| C  | -1.18297100 | 2.79373900  | -0.10407100 |
| C  | -1.18347600 | 4.18718100  | 0.04503100  |
| C  | 2.31874000  | 1.83622200  | -0.16127400 |
| C  | -2.31183600 | 1.89110100  | -0.18348400 |
| H  | -3.33576400 | 2.27426800  | -0.16870600 |
| H  | 3.35078500  | 2.19774200  | -0.13945900 |
| H  | 0.05037200  | 5.95155500  | 0.25017400  |
| H  | 2.20717200  | 4.67654400  | 0.16471500  |
| H  | -2.13081500 | 4.72461800  | 0.11364300  |
| N  | -2.04790600 | 0.60685100  | -0.29871700 |
| N  | 2.02941500  | 0.55861400  | -0.29132400 |
| N  | 0.01315200  | 2.12570300  | -0.18972000 |
| Ru | -0.03785500 | 0.18276400  | -0.27642400 |
| Cl | -0.00463900 | 0.10113600  | 2.13261800  |
| C  | 0.48477800  | -2.92887500 | -0.38255100 |
| H  | 0.86736100  | -2.88542400 | 0.65806100  |
| H  | -0.00441400 | -0.01257000 | -2.03763400 |
| O  | -0.46501500 | -1.91019500 | -0.59930900 |
| H  | -0.16978600 | -0.85525500 | -1.70131000 |
| C  | -0.16652500 | -4.28783100 | -0.63666900 |
| H  | 0.54753900  | -5.11011400 | -0.46409600 |
| H  | -1.02607000 | -4.42438100 | 0.03741700  |
| H  | -0.53199700 | -4.35045300 | -1.67350000 |
| C  | -3.10604900 | -0.41076400 | -0.37558400 |
| C  | -3.21362100 | -1.13657500 | 0.98250200  |
| C  | -4.47844100 | 0.08226100  | -0.85180500 |

|   |             |             |             |
|---|-------------|-------------|-------------|
| H | -2.71558600 | -1.15779100 | -1.09000000 |
| C | -4.19561600 | -2.31054200 | 0.87432400  |
| H | -3.55337100 | -0.41304400 | 1.74577300  |
| H | -2.21213000 | -1.47815300 | 1.27662500  |
| C | -5.44660900 | -1.10700200 | -0.97396300 |
| H | -4.89757800 | 0.80168100  | -0.12382900 |
| H | -4.38275600 | 0.60859300  | -1.81731900 |
| C | -5.57111200 | -1.86442200 | 0.35699300  |
| H | -4.29349900 | -2.80067300 | 1.85674000  |
| H | -3.77040100 | -3.06564500 | 0.18759100  |
| H | -6.43411800 | -0.75264300 | -1.31260700 |
| H | -5.07434400 | -1.79629500 | -1.75405800 |
| H | -6.24076800 | -2.73242100 | 0.23878900  |
| H | -6.04367300 | -1.20143300 | 1.10584200  |
| C | 3.10641900  | -0.44007000 | -0.36616600 |
| C | 4.44741100  | 0.03283500  | -0.94892900 |
| C | 3.31201500  | -1.06688700 | 1.02882100  |
| H | 2.70995600  | -1.23025500 | -1.02870800 |
| C | 5.41356000  | -1.15997700 | -1.05553700 |
| H | 4.90453600  | 0.79417200  | -0.29081900 |
| H | 4.28996100  | 0.50146900  | -1.93537400 |
| C | 4.28860200  | -2.24715800 | 0.94488300  |
| H | 3.71078000  | -0.28420400 | 1.69990900  |
| H | 2.33887800  | -1.36429900 | 1.44535400  |
| C | 5.62483100  | -1.83331100 | 0.30978400  |
| H | 6.37675100  | -0.82564100 | -1.47445900 |
| H | 5.00028700  | -1.89730200 | -1.76836200 |
| H | 4.45269200  | -2.66493400 | 1.95141700  |
| H | 3.82880500  | -3.05311800 | 0.34318000  |
| H | 6.28910500  | -2.70675400 | 0.20387500  |

|   |            |             |             |
|---|------------|-------------|-------------|
| H | 6.14153500 | -1.12485900 | 0.98387800  |
| H | 1.36884700 | -2.81899500 | -1.05280000 |

**Table S14:** Optimized XYZ coordinates for complex **4b**

|    |             |             |             |
|----|-------------|-------------|-------------|
| Ru | 0.02833100  | -0.93025300 | -0.36592500 |
| P  | -0.02123000 | 1.30758300  | 0.37235400  |
| N  | 2.06183900  | -1.13008600 | 0.01142400  |
| N  | -0.00138400 | -1.75590900 | 1.39232900  |
| N  | -2.01590800 | -1.13578600 | -0.05748800 |
| C  | 1.46151100  | 2.37823800  | 0.08642300  |
| C  | 2.31626600  | -1.74976900 | 1.14193400  |
| H  | 3.33755900  | -1.98870900 | 1.45499100  |
| C  | -1.35815900 | 2.46536000  | -0.18008200 |
| C  | 1.18594500  | -2.13604100 | 1.95891500  |
| C  | -0.22966100 | 1.20946100  | 2.19992800  |
| C  | -2.31021600 | -1.71943700 | 1.08274300  |
| H  | -3.34201700 | -1.95064100 | 1.36589100  |
| C  | -1.20814900 | -2.10025900 | 1.93997100  |
| C  | 1.18392200  | -2.82957600 | 3.17640500  |
| H  | 2.12973300  | -3.13002900 | 3.63033200  |
| C  | 1.98528900  | 2.41134400  | -1.21895700 |
| H  | 1.53178500  | 1.78694000  | -1.99529800 |
| C  | -1.24522900 | -2.78210000 | 3.16333300  |
| H  | -2.20629800 | -3.04430800 | 3.60852300  |
| C  | -1.87062000 | 2.35313100  | -1.48258600 |
| H  | -1.48536500 | 1.56940100  | -2.14150500 |
| C  | -0.04018200 | -3.13445100 | 3.78462000  |
| H  | -0.05614200 | -3.66983800 | 4.73533700  |
| C  | 2.01402100  | 3.21277400  | 1.07375200  |
| H  | 1.59183500  | 3.23162800  | 2.08027500  |
| C  | 3.06907500  | 3.24241700  | -1.51775000 |
| H  | 3.46618300  | 3.26091300  | -2.53549800 |
| C  | -1.51824300 | 1.16241600  | 2.76642900  |

|    |             |             |             |
|----|-------------|-------------|-------------|
| H  | -2.39457300 | 1.34262900  | 2.14064100  |
| C  | 0.88123400  | 0.92952800  | 3.02027600  |
| H  | 1.88514100  | 0.91482200  | 2.59040500  |
| C  | -1.79238800 | 3.51850100  | 0.64693800  |
| H  | -1.37358800 | 3.63960800  | 1.64831000  |
| C  | 3.10666800  | 4.03261800  | 0.76935000  |
| H  | 3.53448500  | 4.67080100  | 1.54644600  |
| C  | 3.64174800  | 4.04422000  | -0.52353400 |
| H  | 4.49441300  | 4.68588400  | -0.75788100 |
| C  | 0.70795400  | 0.64861600  | 4.37812900  |
| H  | 1.58086100  | 0.43555800  | 4.99960200  |
| C  | -2.83749300 | 3.25847100  | -1.93464600 |
| H  | -3.22854200 | 3.16207500  | -2.95040600 |
| C  | -1.68563700 | 0.88111600  | 4.12616500  |
| H  | -2.69234000 | 0.85434000  | 4.55014200  |
| C  | -2.76442600 | 4.41371500  | 0.19137900  |
| H  | -3.10244100 | 5.22214000  | 0.84425900  |
| C  | -0.57496200 | 0.62641200  | 4.93712500  |
| H  | -0.70799400 | 0.40408300  | 5.99820500  |
| C  | -3.29613400 | 4.28048200  | -1.09739200 |
| H  | -4.05578600 | 4.98190200  | -1.45071400 |
| Cl | 0.04850700  | -3.23382400 | -1.23084100 |
| Cl | 0.11487900  | -0.17037500 | -2.71721000 |
| C  | -3.07392300 | -0.86074400 | -1.04535600 |
| C  | -3.46462300 | -2.16499200 | -1.76899900 |
| C  | -4.30430400 | -0.12988000 | -0.48339600 |
| H  | -2.59796600 | -0.21288200 | -1.79657600 |
| C  | -4.45815500 | -1.85898800 | -2.89652400 |
| H  | -3.92002000 | -2.85811300 | -1.03684300 |
| H  | -2.54971800 | -2.64497400 | -2.14787500 |



|   |             |             |             |
|---|-------------|-------------|-------------|
| C | -5.29335200 | 0.17000900  | -1.62110600 |
| H | -4.80863400 | -0.75269000 | 0.27829000  |
| H | -3.98503300 | 0.80437700  | 0.00841400  |
| C | -5.69316500 | -1.10654500 | -2.37769800 |
| H | -4.75674800 | -2.79708900 | -3.39215000 |
| H | -3.94950800 | -1.24836000 | -3.66468600 |
| H | -6.18432900 | 0.67862100  | -1.21729700 |
| H | -4.82018300 | 0.87978500  | -2.32382500 |
| H | -6.37099900 | -0.85665100 | -3.21066200 |
| H | -6.26209900 | -1.76788900 | -1.69704400 |
| C | 3.15206900  | -0.81347200 | -0.92653400 |
| C | 4.39080300  | -0.16581700 | -0.28822100 |
| C | 3.51564000  | -2.07802800 | -1.73098900 |
| H | 2.71349500  | -0.09969600 | -1.63996900 |
| C | 5.41493700  | 0.17708000  | -1.38274200 |
| H | 4.85959200  | -0.85734300 | 0.43578400  |
| H | 4.09037900  | 0.74135300  | 0.26269200  |
| C | 4.54655000  | -1.73102000 | -2.81223400 |
| H | 3.92937700  | -2.83350400 | -1.03654600 |
| H | 2.59559000  | -2.50041500 | -2.16172000 |
| C | 5.79191000  | -1.05945700 | -2.21371100 |
| H | 6.31142300  | 0.62970400  | -0.92760800 |
| H | 4.97883500  | 0.94564900  | -2.04648100 |
| H | 4.82614000  | -2.64362300 | -3.36352700 |
| H | 4.07762000  | -1.05268700 | -3.54815800 |
| H | 6.50030900  | -0.77877000 | -3.01074500 |
| H | 6.31895300  | -1.78476000 | -1.56529400 |

**Table S15:** Optimized XYZ coordinates for transition state of dissociation of PPh<sub>3</sub> from **4b** to **7b**

|    |             |             |             |
|----|-------------|-------------|-------------|
| Ru | 1.35348000  | -1.02881300 | 0.44066700  |
| P  | -1.64505600 | 1.10786100  | -0.41182600 |
| N  | 2.73415300  | 0.51122600  | 0.46688900  |
| N  | 0.68105100  | 0.00502100  | 1.88778800  |
| N  | -0.39916600 | -2.04418600 | 0.82847000  |
| C  | -2.94420700 | 0.41642700  | -1.53873200 |
| C  | 2.51987300  | 1.37193200  | 1.44284800  |
| H  | 3.14289900  | 2.25725900  | 1.59097900  |
| C  | -2.62735700 | 1.96095900  | 0.89722100  |
| C  | 1.36701500  | 1.13544300  | 2.27430700  |
| C  | -0.97796200 | 2.52019900  | -1.40638800 |
| C  | -1.05213100 | -1.55623900 | 1.86305300  |
| H  | -2.01755500 | -1.95388900 | 2.18515900  |
| C  | -0.48266800 | -0.39770500 | 2.50431400  |
| C  | 0.86169900  | 1.91581500  | 3.32189600  |
| H  | 1.39446200  | 2.82011000  | 3.62078400  |
| C  | -2.52197200 | -0.60603300 | -2.41097700 |
| H  | -1.47551800 | -0.92563400 | -2.39870600 |
| C  | -0.99451600 | 0.36697700  | 3.56006700  |
| H  | -1.92748100 | 0.06544400  | 4.03680500  |
| C  | -2.28206100 | 3.24314100  | 1.36260400  |
| H  | -1.51629500 | 3.81977300  | 0.83857300  |
| C  | -0.32068300 | 1.52593200  | 3.96379000  |
| H  | -0.73026100 | 2.13605200  | 4.76950600  |
| C  | -4.28865600 | 0.82918500  | -1.56949800 |
| H  | -4.63249000 | 1.61894200  | -0.89710400 |
| C  | -3.42809200 | -1.20089400 | -3.29466800 |
| H  | -3.08508200 | -1.98980300 | -3.96876000 |
| C  | -1.78868600 | 3.50112300  | -2.00533900 |

|    |             |             |             |
|----|-------------|-------------|-------------|
| H  | -2.87518700 | 3.44658400  | -1.89956900 |
| C  | 0.41616200  | 2.58763400  | -1.56610100 |
| H  | 1.03894600  | 1.80333300  | -1.12971400 |
| C  | -3.61443600 | 1.23669900  | 1.59934800  |
| H  | -3.88998500 | 0.23281800  | 1.26345500  |
| C  | -5.19368200 | 0.22406000  | -2.44879400 |
| H  | -6.23640400 | 0.55175500  | -2.46190800 |
| C  | -4.76720100 | -0.79256900 | -3.31161600 |
| H  | -5.47667700 | -1.26414900 | -3.99581500 |
| C  | 0.99466700  | 3.62856100  | -2.30291100 |
| H  | 2.07987300  | 3.66560500  | -2.43034000 |
| C  | -2.91051300 | 3.78758900  | 2.48846600  |
| H  | -2.62917000 | 4.78658100  | 2.83140400  |
| C  | -1.20932700 | 4.54059900  | -2.73793700 |
| H  | -1.84499900 | 5.29923900  | -3.20147500 |
| C  | -4.25015900 | 1.78802200  | 2.71469500  |
| H  | -5.02388500 | 1.21614200  | 3.23374000  |
| C  | 0.18339300  | 4.60721500  | -2.88566100 |
| H  | 0.63216100  | 5.41866700  | -3.46382300 |
| C  | -3.89796300 | 3.06638900  | 3.16796000  |
| H  | -4.39296100 | 3.49631400  | 4.04177100  |
| Cl | 2.57652800  | -2.32164800 | 1.96697400  |
| Cl | 1.21053000  | -1.13808600 | -1.94054200 |
| C  | -0.93345300 | -3.14595000 | 0.01806500  |
| C  | -0.07363700 | -4.40749600 | 0.22550200  |
| C  | -2.42693400 | -3.44692000 | 0.19281100  |
| H  | -0.76902900 | -2.81415000 | -1.02396600 |
| C  | -0.50968700 | -5.51270500 | -0.74681400 |
| H  | -0.18509000 | -4.74434400 | 1.27212400  |
| H  | 0.98747400  | -4.14922000 | 0.08737400  |

|   |             |             |             |
|---|-------------|-------------|-------------|
| C | -2.85418800 | -4.54162300 | -0.79850800 |
| H | -2.62932600 | -3.79860700 | 1.22188200  |
| H | -3.01668700 | -2.52893600 | 0.02674200  |
| C | -2.01128800 | -5.81453900 | -0.62709300 |
| H | 0.08301300  | -6.42374600 | -0.56416300 |
| H | -0.28211000 | -5.19091300 | -1.77962500 |
| H | -3.92561300 | -4.76549600 | -0.66830500 |
| H | -2.73900400 | -4.15497500 | -1.82782800 |
| H | -2.31114300 | -6.57277600 | -1.36922400 |
| H | -2.21525900 | -6.25061800 | 0.36882900  |
| C | 3.83488900  | 0.67491600  | -0.49436800 |
| C | 4.60035500  | 2.00240300  | -0.42690600 |
| C | 4.78875900  | -0.52888600 | -0.37131200 |
| H | 3.34594000  | 0.59735100  | -1.48525400 |
| C | 5.67329000  | 2.05183200  | -1.52865200 |
| H | 5.09531900  | 2.10036000  | 0.55749600  |
| H | 3.90385800  | 2.85304800  | -0.53071400 |
| C | 5.87563700  | -0.47196900 | -1.45323100 |
| H | 5.23992500  | -0.51861400 | 0.63697000  |
| H | 4.20705000  | -1.46007900 | -0.44651700 |
| C | 6.63706000  | 0.86109200  | -1.42399600 |
| H | 6.22475000  | 3.00441800  | -1.46862400 |
| H | 5.17778100  | 2.03605500  | -2.51700000 |
| H | 6.57106700  | -1.31693500 | -1.32372900 |
| H | 5.40291700  | -0.60243100 | -2.44393000 |
| H | 7.37894500  | 0.89980100  | -2.23849700 |
| H | 7.20326700  | 0.93688700  | -0.47696400 |

**Table S16:** Optimized XYZ coordinates for complex **7b**

|    |             |             |             |
|----|-------------|-------------|-------------|
| C  | 1.21209800  | 2.41649500  | -0.00038800 |
| C  | -1.21205000 | 2.41645800  | -0.00040600 |
| C  | -1.21534800 | 3.81680600  | -0.00066300 |
| C  | -0.00001900 | 4.51417300  | -0.00078700 |
| C  | 1.21533100  | 3.81684700  | -0.00065200 |
| H  | -2.16924700 | 4.34675100  | -0.00075600 |
| H  | -0.00003400 | 5.60497100  | -0.00098200 |
| H  | 2.16920900  | 4.34683200  | -0.00073700 |
| C  | -2.32009700 | 1.49935300  | -0.00034400 |
| H  | -3.35264700 | 1.86163800  | -0.00055900 |
| C  | 2.32014400  | 1.49941200  | -0.00016200 |
| Ru | 0.00007200  | -0.13264900 | 0.00018100  |
| N  | 0.00002500  | 1.74919500  | -0.00028000 |
| N  | 2.02184500  | 0.21533500  | 0.00013600  |
| N  | -2.02184800 | 0.21529200  | -0.00011600 |
| Cl | -0.00009200 | -0.67987900 | 2.30558000  |
| Cl | -0.00001900 | -0.68194600 | -2.30477000 |
| H  | 3.35270600  | 1.86164500  | -0.00023400 |
| C  | 3.08829000  | -0.80026800 | 0.00035300  |
| C  | 3.94687800  | -0.73293000 | -1.27655200 |
| C  | 3.94811600  | -0.73141100 | 1.27633100  |
| H  | 2.56068600  | -1.76941500 | 0.00120400  |
| C  | 5.00369600  | -1.84784600 | -1.26862700 |
| H  | 4.45041200  | 0.25019900  | -1.32497200 |
| H  | 3.28790300  | -0.80674600 | -2.15573800 |
| C  | 5.00485000  | -1.84641500 | 1.26869600  |
| H  | 4.45183100  | 0.25170200  | 1.32312900  |
| H  | 3.29000900  | -0.80415300 | 2.15625800  |
| C  | 5.86899500  | -1.79590300 | -0.00038900 |

|   |             |             |             |
|---|-------------|-------------|-------------|
| H | 5.63228300  | -1.77187300 | -2.17078800 |
| H | 4.49470700  | -2.82767900 | -1.32463100 |
| H | 5.63426000  | -1.76950400 | 2.17020200  |
| H | 4.49584300  | -2.82615100 | 1.32621900  |
| H | 6.59663600  | -2.62388900 | -0.00025500 |
| H | 6.45820000  | -0.85956600 | -0.00117600 |
| C | -3.08831500 | -0.80027500 | -0.00016800 |
| C | -3.94717100 | -0.73244500 | 1.27653400  |
| C | -3.94788100 | -0.73185900 | -1.27634700 |
| H | -2.56074800 | -1.76944200 | -0.00057000 |
| C | -5.00398800 | -1.84736500 | 1.26879900  |
| H | -4.45072400 | 0.25069800  | 1.32447800  |
| H | -3.28838800 | -0.80592500 | 2.15589200  |
| C | -5.00465000 | -1.84682700 | -1.26852700 |
| H | -4.45154900 | 0.25125600  | -1.32360300 |
| H | -3.28958600 | -0.80495100 | -2.15610400 |
| C | -5.86903900 | -1.79586000 | 0.00037300  |
| H | -5.63275100 | -1.77107800 | 2.17081000  |
| H | -4.49501000 | -2.82717900 | 1.32523900  |
| H | -5.63388900 | -1.77020200 | -2.17017800 |
| H | -4.49566000 | -2.82659600 | -1.32562600 |
| H | -6.59669000 | -2.62383700 | 0.00038800  |
| H | -6.45823400 | -0.85951600 | 0.00072200  |

**Table S17:** Optimized XYZ coordinates for complex **8c**

|    |             |             |             |
|----|-------------|-------------|-------------|
| Ru | 0.06804800  | -0.36572300 | -0.21789000 |
| N  | -1.95421100 | -0.17551600 | 0.14855900  |
| N  | -0.03694000 | 1.49139700  | 0.08690800  |
| N  | 2.04080200  | 0.15957500  | -0.49517300 |
| C  | -2.30718900 | 1.06757400  | 0.41586000  |
| H  | -3.34804600 | 1.34239700  | 0.61864000  |
| C  | -1.26601700 | 2.05431200  | 0.40616900  |
| C  | 2.25099600  | 1.45681300  | -0.35209500 |
| H  | 3.24676000  | 1.89344000  | -0.48604400 |
| C  | 1.11703800  | 2.26027100  | -0.00967800 |
| C  | -1.34674100 | 3.42830200  | 0.65504700  |
| H  | -2.31374600 | 3.86747500  | 0.90618100  |
| C  | 1.03750600  | 3.63780000  | 0.23459000  |
| H  | 1.94410900  | 4.24117700  | 0.16109600  |
| C  | -0.19102500 | 4.22002300  | 0.56893600  |
| H  | -0.25080800 | 5.29214100  | 0.76070500  |
| Cl | -0.37992100 | -0.47988000 | -2.57641700 |
| C  | 3.19489400  | -0.72436300 | -0.74378600 |
| C  | 3.68824400  | -1.25323200 | 0.61319100  |
| C  | 2.79599000  | -1.85856900 | -1.68859400 |
| H  | 4.06424000  | -0.43148100 | 1.24155600  |
| H  | 2.03295100  | -2.50061300 | -1.21925300 |
| C  | -3.00974700 | -1.21317000 | 0.03039700  |
| C  | -3.90400700 | -0.91671800 | -1.18487900 |
| C  | -2.36224400 | -2.59323100 | -0.09014800 |
| H  | -4.42987100 | 0.04397900  | -1.08070400 |
| H  | -1.66274200 | -2.78874900 | 0.73524300  |
| H  | -3.28509600 | -0.87729800 | -2.09349900 |
| H  | -3.13772900 | -3.37390900 | -0.08228700 |

|   |             |             |             |
|---|-------------|-------------|-------------|
| H | -3.61708700 | -1.17152600 | 0.95553600  |
| H | 3.99353500  | -0.12188400 | -1.21925800 |
| H | 2.37627000  | -1.46976600 | -2.62588100 |
| H | 2.85486000  | -1.73395700 | 1.14731900  |
| H | 3.67538200  | -2.48155200 | -1.91224200 |
| H | -4.65895600 | -1.70969900 | -1.29772000 |
| H | -1.80860800 | -2.66560000 | -1.03976800 |
| H | 4.50043900  | -1.98109400 | 0.46301600  |
| O | 0.51576700  | -1.23556400 | 1.49728900  |
| C | -0.29250400 | -1.17522000 | 2.65647500  |
| H | -0.43234000 | -0.11908700 | 2.96546100  |
| H | -1.30778700 | -1.59253400 | 2.48262600  |
| C | 0.39913600  | -1.95590300 | 3.77146100  |
| H | 1.39266200  | -1.52957700 | 3.97561900  |
| H | -0.19612500 | -1.92727200 | 4.69846300  |
| H | 0.53260200  | -3.00703500 | 3.47341900  |



**Table S18:** Optimized XYZ coordinates for complex **TS-9c**

|   |             |             |             |
|---|-------------|-------------|-------------|
| C | -1.39021600 | 2.01541000  | -0.43529100 |
| C | -1.53720500 | 3.41440600  | -0.53761500 |
| C | -0.39437800 | 4.21573600  | -0.51961700 |
| C | 0.88523200  | 3.64370100  | -0.38148700 |
| C | 0.98180300  | 2.25224100  | -0.28527100 |
| H | -2.53231200 | 3.85738100  | -0.60586800 |
| H | -0.49417000 | 5.30026700  | -0.59380500 |
| H | 1.78027700  | 4.26660600  | -0.34387300 |
| C | 2.18744600  | 1.43802100  | -0.14821300 |
| H | 3.16902900  | 1.92297200  | -0.18766600 |
| C | -2.40236700 | 0.99860300  | -0.32282900 |
| H | -3.46408200 | 1.25963500  | -0.32857200 |
| C | 3.22675100  | -0.74938600 | 0.01687000  |
| H | 2.99993000  | -1.48490300 | -0.77607600 |
| C | 3.23519100  | -1.47648700 | 1.36954200  |
| H | 2.25195600  | -1.92194500 | 1.57405600  |
| H | 4.00310300  | -2.26478000 | 1.36447900  |
| H | 3.45529600  | -0.76870700 | 2.18318400  |
| C | 4.57555900  | -0.09823900 | -0.29537400 |
| H | 4.57259100  | 0.41272300  | -1.27088600 |
| H | 4.87548600  | 0.62110800  | 0.48420700  |
| H | 5.34816300  | -0.88010800 | -0.33041000 |
| C | -3.02713000 | -1.28018000 | 0.19317500  |
| H | -2.47728100 | -2.23239200 | 0.19075500  |
| C | -3.55899800 | -1.04696300 | 1.61372300  |
| H | -4.15438700 | -0.12133700 | 1.66526100  |
| H | -4.20230000 | -1.88825100 | 1.91449300  |
| H | -2.72085600 | -0.96041300 | 2.32003800  |
| C | -4.13536000 | -1.35783700 | -0.86395700 |

|    |             |             |             |
|----|-------------|-------------|-------------|
| H  | -4.77091400 | -0.45828500 | -0.86625300 |
| H  | -3.71168700 | -1.48457000 | -1.87160000 |
| H  | -4.78617800 | -2.21903200 | -0.64925500 |
| N  | 2.05820800  | 0.14685100  | -0.02559900 |
| N  | -0.13680000 | 1.48691400  | -0.34815800 |
| N  | -1.99834700 | -0.25321000 | -0.12839200 |
| Ru | 0.01295900  | -0.49408900 | -0.02852000 |
| H  | -1.14390600 | -2.43539200 | -1.45662200 |
| C  | -0.05425600 | -2.26759400 | -1.32084000 |
| C  | 0.75176200  | -3.54875100 | -1.22496700 |
| O  | 0.46580200  | -1.23602800 | -1.94578100 |
| Cl | -0.04821500 | 0.01096100  | 2.34705300  |
| H  | 0.14246400  | -2.03275500 | 0.52529200  |
| H  | 1.77424400  | -3.35400800 | -0.87360200 |
| H  | 0.27300800  | -4.27102700 | -0.54765000 |
| H  | 0.81113800  | -4.00096400 | -2.23045900 |

**Table S19:** Optimized XYZ coordinates for complex **10c**

|    |             |             |             |
|----|-------------|-------------|-------------|
| Ru | -0.00004400 | -0.39083900 | 0.01735800  |
| N  | -2.04583700 | 0.02899800  | 0.05241200  |
| N  | 0.00024300  | 1.55161500  | 0.01484000  |
| N  | 2.04583100  | 0.02841800  | 0.05236400  |
| C  | -2.31272400 | 1.32304000  | 0.02622500  |
| H  | -3.34574500 | 1.68830300  | 0.05440300  |
| C  | -1.20014500 | 2.23413800  | -0.01773400 |
| C  | 2.31312800  | 1.32237000  | 0.02610400  |
| H  | 3.34626300  | 1.68731800  | 0.05421900  |
| C  | 1.20082200  | 2.23379500  | -0.01781600 |
| C  | -1.21343200 | 3.63376400  | -0.08256500 |
| H  | -2.16828000 | 4.16181300  | -0.11109400 |
| C  | 1.21451700  | 3.63341500  | -0.08266000 |
| H  | 2.16951600  | 4.16118700  | -0.11124800 |
| C  | 0.00064200  | 4.33329000  | -0.11175400 |
| H  | 0.00079800  | 5.42320000  | -0.16170500 |
| Cl | -0.00039900 | -2.74535800 | -0.44984300 |
| C  | 3.20323400  | -0.89117800 | 0.15528900  |
| C  | 3.02655400  | -1.80402800 | 1.37277900  |
| C  | 3.35622600  | -1.67596700 | -1.15327000 |
| H  | 2.91028600  | -1.21108900 | 2.29234400  |
| H  | 2.46897800  | -2.29980100 | -1.33016900 |
| C  | -3.20353100 | -0.89023500 | 0.15531300  |
| C  | -3.35682300 | -1.67483600 | -1.15332200 |
| C  | -3.02707700 | -1.80327200 | 1.37269500  |
| H  | -3.48914600 | -0.99101800 | -2.00571600 |
| H  | -2.91053700 | -1.21047100 | 2.29231400  |
| H  | -2.46975800 | -2.29889500 | -1.33034700 |
| H  | -3.91437000 | -2.44599400 | 1.48122800  |

|   |             |             |             |
|---|-------------|-------------|-------------|
| H | -4.10915100 | -0.26935700 | 0.30558900  |
| H | 4.10906100  | -0.27057300 | 0.30545400  |
| H | 3.48868700  | -0.99228000 | -2.00574700 |
| H | 2.13909100  | -2.44002800 | 1.24853300  |
| H | 4.24147100  | -2.32766200 | -1.09072700 |
| H | -4.24224700 | -2.32628800 | -1.09079300 |
| H | -2.13984300 | -2.43956500 | 1.24831500  |
| H | 3.91363400  | -2.44704300 | 1.48131400  |
| H | -0.00000400 | -0.39274000 | 1.58438700  |

**Table S20.** Optimized XYZ coordinates for complex **TS-11c**

|    |             |             |             |
|----|-------------|-------------|-------------|
| C  | 4.68355800  | -0.00028100 | 0.51826400  |
| C  | 3.99337800  | -1.21330600 | 0.40678400  |
| C  | 2.61991000  | -1.20274300 | 0.11881600  |
| C  | 2.63182900  | 1.19963900  | 0.07161300  |
| C  | 4.00413600  | 1.21495100  | 0.35340000  |
| C  | 1.72815000  | -2.30763100 | -0.08804600 |
| C  | 1.73577500  | 2.31401700  | -0.10220800 |
| H  | 2.11068700  | 3.33929600  | -0.04658700 |
| H  | 2.09642600  | -3.33781500 | -0.09608900 |
| H  | 5.75130700  | -0.00059700 | 0.74366400  |
| H  | 4.50597400  | -2.16708100 | 0.54388000  |
| H  | 4.52269500  | 2.16992600  | 0.45447100  |
| N  | 0.46797100  | 2.03874200  | -0.32378700 |
| N  | 0.46122500  | -2.00866100 | -0.34277300 |
| N  | 1.96557700  | 0.00186300  | -0.05101600 |
| Ru | 0.05832500  | -0.00815800 | -0.29632200 |
| C  | -0.50780300 | 3.12723500  | -0.53638700 |
| H  | -1.35048800 | 2.87875200  | 0.12797600  |
| C  | -1.01830700 | 3.04001200  | -1.98224400 |
| H  | -1.87889700 | 3.71213700  | -2.11697200 |
| H  | -0.22477800 | 3.33200600  | -2.68906500 |
| H  | -1.32586600 | 2.01211100  | -2.21939600 |
| C  | -0.02057700 | 4.53604600  | -0.19005100 |
| H  | 0.35230800  | 4.59480700  | 0.84414800  |
| H  | 0.76913400  | 4.88721700  | -0.87478800 |
| H  | -0.86554800 | 5.23456100  | -0.28096700 |
| C  | -0.46007400 | -3.11093100 | -0.71673100 |
| H  | -1.40495700 | -2.60437300 | -0.96234000 |
| C  | 0.01323600  | -3.84423100 | -1.97811000 |

|    |             |             |             |
|----|-------------|-------------|-------------|
| H  | 0.94201700  | -4.40798000 | -1.79776700 |
| H  | -0.75531500 | -4.55980600 | -2.30888000 |
| H  | 0.19451300  | -3.12582100 | -2.79091400 |
| C  | -0.69068900 | -4.05386200 | 0.47203000  |
| H  | 0.21659400  | -4.63456500 | 0.70235900  |
| H  | -0.96418900 | -3.48610800 | 1.37399200  |
| H  | -1.49881600 | -4.76534900 | 0.24228400  |
| Cl | -0.35874400 | 0.18856700  | 2.28561400  |
| C  | -2.84680400 | -0.83126900 | 0.44650200  |
| H  | 0.05859700  | -0.01407100 | -1.89181100 |
| O  | -2.16263000 | -0.11752900 | -0.51356600 |
| H  | -2.21490400 | -1.61198900 | 0.89759200  |
| O  | -3.39301600 | 1.87200500  | 0.02739900  |
| H  | -4.24879300 | 1.99123700  | -0.41416600 |
| H  | -2.78965900 | 1.01815100  | -0.47971100 |
| O  | -3.15471400 | 0.08976900  | 1.62390600  |
| H  | -2.20394300 | 0.23293600  | 2.02823000  |
| H  | -3.41464400 | 1.05598900  | 1.04615500  |
| C  | -4.18153000 | -1.37407200 | -0.03342400 |
| H  | -4.00509000 | -2.09194000 | -0.84714700 |
| H  | -4.71836600 | -1.87607000 | 0.78363200  |
| H  | -4.80928500 | -0.56125300 | -0.42916000 |

**Table S21:** Optimized XYZ coordinates for complex **12c**

|    |             |             |             |
|----|-------------|-------------|-------------|
| C  | -4.44866800 | -1.18403600 | 0.29413400  |
| C  | -4.10593700 | 0.16935300  | 0.17518100  |
| C  | -2.76496500 | 0.52784300  | -0.02093700 |
| C  | -2.12211800 | -1.79367400 | 0.03074200  |
| C  | -3.45712300 | -2.17210600 | 0.22735600  |
| C  | -2.18643400 | 1.83614400  | -0.17531600 |
| C  | -0.94717900 | -2.62330000 | -0.04950200 |
| H  | -1.02346900 | -3.70938800 | 0.05001400  |
| H  | -2.80944700 | 2.73467100  | -0.16777900 |
| H  | -5.49064300 | -1.46899900 | 0.44834500  |
| H  | -4.86608500 | 0.94991500  | 0.23892900  |
| H  | -3.70660700 | -3.22917900 | 0.33425200  |
| N  | 0.20374200  | -2.01039200 | -0.24300700 |
| N  | -0.87636900 | 1.88347500  | -0.34721900 |
| N  | -1.80183700 | -0.45944100 | -0.10401700 |
| Ru | 0.02668600  | 0.05349700  | -0.30039100 |
| C  | 1.46050200  | -2.77870500 | -0.36579600 |
| H  | 2.20308400  | -2.17428800 | 0.18110500  |
| C  | 1.86557600  | -2.79951600 | -1.84815800 |
| H  | 2.88966900  | -3.18567800 | -1.96267500 |
| H  | 1.18023000  | -3.43968500 | -2.42658100 |
| H  | 1.80850200  | -1.78833800 | -2.27887000 |
| C  | 1.43556400  | -4.18361300 | 0.23986300  |
| H  | 1.09290600  | -4.15859300 | 1.28518400  |
| H  | 0.79527100  | -4.87661700 | -0.33007000 |
| H  | 2.45467100  | -4.59784600 | 0.22718200  |
| C  | -0.18332100 | 3.18366900  | -0.49338000 |
| H  | 0.75891500  | 2.92625900  | -1.00241500 |
| C  | -0.93896800 | 4.20458000  | -1.35098700 |

|    |             |             |             |
|----|-------------|-------------|-------------|
| H  | -1.84347700 | 4.58367700  | -0.84931000 |
| H  | -0.28866100 | 5.07136100  | -1.54336400 |
| H  | -1.22940800 | 3.76998100  | -2.31944300 |
| C  | 0.15258800  | 3.72041900  | 0.90674800  |
| H  | -0.76426400 | 4.04582000  | 1.42415500  |
| H  | 0.62149800  | 2.93563400  | 1.51845300  |
| H  | 0.83374100  | 4.58199900  | 0.83027100  |
| Cl | 0.55117200  | 0.14704300  | 2.19899600  |
| O  | 3.30302400  | -0.26278700 | 1.06247800  |
| C  | 3.15246900  | 0.92160000  | 0.36115800  |
| H  | 2.70234000  | 1.71173400  | 0.98513900  |
| H  | 0.01886600  | 0.02519200  | -1.90992200 |
| H  | 2.48301000  | -0.33084400 | 1.63011800  |
| O  | 2.14996700  | 0.78910800  | -0.72189200 |
| H  | 2.52447100  | 0.17799600  | -1.38224600 |
| C  | 4.48068000  | 1.33657900  | -0.24046000 |
| H  | 4.36554800  | 2.23893300  | -0.85629200 |
| H  | 5.20321100  | 1.53532100  | 0.56301800  |
| H  | 4.88333600  | 0.51989900  | -0.86177800 |



**Table S22:** Optimized XYZ coordinates for complex **TS-13c**

|    |             |             |             |
|----|-------------|-------------|-------------|
| C  | 4.00079200  | -2.26648300 | -0.20140300 |
| C  | 2.78541100  | -2.96362300 | -0.19190700 |
| C  | 1.58416800  | -2.24120400 | -0.20181500 |
| C  | 2.79567200  | -0.16974300 | -0.20913200 |
| C  | 4.01256600  | -0.86455100 | -0.20107000 |
| C  | 0.22676700  | -2.73295600 | -0.19479600 |
| C  | 2.57026100  | 1.25781300  | -0.14759100 |
| H  | 3.41389900  | 1.94952100  | -0.07456000 |
| H  | 0.02694600  | -3.80834900 | -0.21124100 |
| H  | 4.94282800  | -2.81705700 | -0.19143800 |
| H  | 2.76160800  | -4.05434700 | -0.16377700 |
| H  | 4.95219500  | -0.31002400 | -0.17700500 |
| N  | 1.32289100  | 1.67215300  | -0.15458100 |
| N  | -0.74304200 | -1.84428100 | -0.19961800 |
| N  | 1.61577600  | -0.87152100 | -0.23968800 |
| Ru | -0.04456000 | 0.12748900  | -0.16433600 |
| C  | 0.97717000  | 3.10365200  | -0.02904500 |
| H  | 0.13142200  | 3.09910300  | 0.67870500  |
| C  | 0.45207900  | 3.60946700  | -1.38155400 |
| H  | 0.15157500  | 4.66408700  | -1.28765600 |
| H  | 1.23453900  | 3.53655000  | -2.15396800 |
| H  | -0.42711400 | 3.02783000  | -1.68513100 |
| C  | 2.09663000  | 3.98675000  | 0.52523700  |
| H  | 2.49153300  | 3.58910100  | 1.47244500  |
| H  | 2.92855900  | 4.10753500  | -0.18844000 |
| H  | 1.69195800  | 4.99017400  | 0.72298700  |
| C  | -2.15429500 | -2.29889500 | -0.17854800 |
| H  | -2.71530300 | -1.48906700 | -0.66919700 |
| C  | -2.41769100 | -3.59823100 | -0.94711900 |

|    |             |             |             |
|----|-------------|-------------|-------------|
| H  | -2.00248400 | -4.48552500 | -0.44220700 |
| H  | -3.50480300 | -3.74972400 | -1.02184800 |
| H  | -2.01087600 | -3.54925700 | -1.96905000 |
| C  | -2.60470300 | -2.39083800 | 1.28871300  |
| H  | -2.12635600 | -3.25133400 | 1.78461700  |
| H  | -2.32034200 | -1.48517400 | 1.84322400  |
| H  | -3.69675600 | -2.51831400 | 1.33601500  |
| Cl | -0.01669500 | 0.16771700  | 2.24594800  |
| O  | -3.71599100 | 0.42479700  | -1.07737900 |
| C  | -3.03665600 | 1.11793600  | -0.00818800 |
| H  | -3.02560400 | 0.38050400  | 0.81484200  |
| H  | -0.37089600 | 0.26060700  | -1.87984300 |
| H  | -3.75190000 | 1.05701400  | -1.81734900 |
| O  | -1.74691300 | 1.50409100  | -0.36994900 |
| H  | -1.08289500 | 0.72999200  | -1.46203400 |
| C  | -3.80984600 | 2.36730000  | 0.41110700  |
| H  | -4.85161800 | 2.11200300  | 0.65505300  |
| H  | -3.33323500 | 2.82906400  | 1.28750900  |
| H  | -3.79849800 | 3.10044100  | -0.41251000 |

**Table S23:** Optimized XYZ coordinates for complex **14c**

|    |             |             |             |
|----|-------------|-------------|-------------|
| Ru | 0.08008800  | -0.44114400 | -0.28730400 |
| N  | -1.95326800 | -0.16219700 | -0.04817700 |
| N  | 0.01007600  | 1.43969400  | -0.23956700 |
| N  | 2.07789900  | -0.00299000 | -0.53272900 |
| C  | -2.28057400 | 1.11004200  | 0.04369000  |
| H  | -3.31925200 | 1.43114200  | 0.17863900  |
| C  | -1.21266800 | 2.06398000  | -0.05600000 |
| C  | 2.31462300  | 1.29630900  | -0.55167700 |
| H  | 3.32703200  | 1.69183200  | -0.68982400 |
| C  | 1.18536700  | 2.16247800  | -0.38198600 |
| C  | -1.26995800 | 3.45959500  | -0.00649800 |
| H  | -2.23467900 | 3.94712300  | 0.14255300  |
| C  | 1.13319900  | 3.56296700  | -0.34073800 |
| H  | 2.05788900  | 4.13095400  | -0.45770200 |
| C  | -0.09285800 | 4.20972400  | -0.15082400 |
| H  | -0.13412100 | 5.29917200  | -0.11598500 |
| Cl | -0.25419800 | -0.90210700 | -2.61922800 |
| C  | 3.22055600  | -0.93372300 | -0.59744500 |
| C  | 3.61787100  | -1.30619900 | 0.84045900  |
| C  | 2.85158000  | -2.16507600 | -1.42575300 |
| H  | 3.97768500  | -0.42275300 | 1.38966700  |
| H  | 2.05486400  | -2.74145200 | -0.92828300 |
| C  | -3.03239400 | -1.18006600 | -0.05546600 |
| C  | -3.77894900 | -1.13187700 | -1.39855800 |
| C  | -2.43493700 | -2.56472000 | 0.19736100  |
| H  | -4.25033500 | -0.15108200 | -1.56072900 |
| H  | -1.85703600 | -2.59573200 | 1.13203700  |
| H  | -3.07239400 | -1.31583600 | -2.22128400 |
| H  | -3.23767700 | -3.31493200 | 0.25724700  |

|   |             |             |             |
|---|-------------|-------------|-------------|
| H | -3.73301300 | -0.92681400 | 0.76368700  |
| H | 4.06294800  | -0.40790200 | -1.08797300 |
| H | 2.48580400  | -1.88180200 | -2.42161300 |
| H | 2.74392300  | -1.70533400 | 1.37674700  |
| H | 3.73083600  | -2.81892500 | -1.52947400 |
| H | -4.56561400 | -1.90159000 | -1.41732100 |
| H | -1.76733300 | -2.84326100 | -0.63428300 |
| H | 4.41823400  | -2.06177000 | 0.82617600  |
| O | 0.42677700  | -0.96525100 | 1.60624600  |
| C | -0.40564600 | -0.59584600 | 2.66283000  |
| H | -1.47462900 | -0.81350500 | 2.46384100  |
| O | -0.39336900 | 0.82363500  | 2.85885300  |
| H | 0.54956900  | 1.06448400  | 2.91440600  |
| C | 0.06251300  | -1.34240800 | 3.91275000  |
| H | -0.53359100 | -1.03504500 | 4.78413000  |
| H | -0.03131200 | -2.42952300 | 3.77209600  |
| H | 1.12311900  | -1.11097700 | 4.10113400  |

**Table S24:** Optimized XYZ coordinates for complex **TS-15c**

|    |             |             |             |
|----|-------------|-------------|-------------|
| C  | -0.12759300 | 4.20795700  | -1.05225400 |
| C  | 1.10297800  | 3.55277200  | -0.94537100 |
| C  | 1.11750700  | 2.18405800  | -0.61082600 |
| C  | -1.26926000 | 2.16194200  | -0.48460800 |
| C  | -1.33189700 | 3.52258400  | -0.81094900 |
| C  | 2.24118400  | 1.31931900  | -0.34755900 |
| C  | -2.35947900 | 1.25279600  | -0.15834700 |
| H  | -3.39222200 | 1.61998700  | -0.15663900 |
| H  | 3.26302800  | 1.70851200  | -0.37894600 |
| H  | -0.15339600 | 5.26890200  | -1.30796000 |
| H  | 2.04038100  | 4.09079700  | -1.09714400 |
| H  | -2.29316700 | 4.03597300  | -0.86660400 |
| N  | -2.06885900 | 0.01048500  | 0.13499800  |
| N  | 1.98928600  | 0.06401000  | 0.01025300  |
| N  | -0.06619600 | 1.53163100  | -0.42804100 |
| Ru | -0.00195100 | -0.39325500 | 0.13629900  |
| C  | -3.15643200 | -0.94843300 | 0.44389200  |
| H  | -2.64176900 | -1.77374900 | 0.95876400  |
| C  | -3.74240900 | -1.46622400 | -0.87879200 |
| H  | -4.41389000 | -2.31858500 | -0.69335400 |
| H  | -4.32115700 | -0.67231500 | -1.37819000 |
| H  | -2.93686700 | -1.77879600 | -1.55855900 |
| C  | -4.22015000 | -0.38611700 | 1.39303000  |
| H  | -3.74774700 | 0.03949600  | 2.29013200  |
| H  | -4.84257000 | 0.38675500  | 0.91447600  |
| H  | -4.89368000 | -1.19850500 | 1.70508800  |
| C  | 3.12842300  | -0.77419100 | 0.48181500  |
| H  | 2.72275300  | -1.79465200 | 0.51206200  |
| C  | 4.33005400  | -0.75645700 | -0.47301300 |

|    |             |             |             |
|----|-------------|-------------|-------------|
| H  | 4.85159100  | 0.21345100  | -0.47218200 |
| H  | 5.05626100  | -1.52000900 | -0.15684600 |
| H  | 4.03448300  | -0.98137800 | -1.51044200 |
| C  | 3.50717200  | -0.35894300 | 1.90921000  |
| H  | 3.95147000  | 0.64975200  | 1.91732600  |
| H  | 2.61481600  | -0.34821800 | 2.55040800  |
| H  | 4.24316700  | -1.06688100 | 2.32056600  |
| Cl | -0.05101500 | 0.29057900  | 2.44723100  |
| O  | 1.53897000  | -2.70325400 | -1.35711800 |
| C  | 0.21820100  | -2.38757200 | -1.13554300 |
| H  | 0.06795000  | -1.91767900 | 0.78098500  |
| H  | 1.92455200  | -1.90613700 | -1.77105500 |
| O  | -0.28917200 | -1.38670000 | -1.76194800 |
| C  | -0.57872200 | -3.63446900 | -0.82555400 |
| H  | -0.70917500 | -4.19426000 | -1.76744900 |
| H  | -0.04579200 | -4.26941100 | -0.10806500 |
| H  | -1.56141000 | -3.36706000 | -0.42517600 |

**Table S25:** Optimized XYZ coordinates for complex **TS-16c**

|   |             |             |             |
|---|-------------|-------------|-------------|
| C | -1.37337400 | 1.86756300  | -0.77075800 |
| C | -1.46609200 | 3.13971200  | -1.35201700 |
| C | -0.29010400 | 3.85468600  | -1.62076900 |
| C | 0.96105600  | 3.31007800  | -1.29956400 |
| C | 1.02178900  | 2.03455500  | -0.72013200 |
| H | -2.44606000 | 3.56445200  | -1.57631100 |
| H | -0.34999800 | 4.84748000  | -2.06973500 |
| H | 1.88090600  | 3.86815200  | -1.48290000 |
| C | 2.17984900  | 1.28155400  | -0.30040600 |
| H | 3.18427100  | 1.69365000  | -0.42926200 |
| C | -2.43236300 | 0.97559300  | -0.35616100 |
| H | -3.48081300 | 1.26561500  | -0.46864100 |
| C | 3.11499500  | -0.72225500 | 0.71133000  |
| H | 2.86021000  | -1.75354500 | 0.41614500  |
| C | 3.13530000  | -0.67073500 | 2.24590900  |
| H | 2.14919400  | -0.92566100 | 2.65631700  |
| H | 3.88706300  | -1.37743600 | 2.62968300  |
| H | 3.39110700  | 0.34243800  | 2.59264500  |
| C | 4.47442400  | -0.36964500 | 0.10122600  |
| H | 4.43712300  | -0.35756100 | -0.99945300 |
| H | 4.85073700  | 0.60400600  | 0.45421400  |
| H | 5.20963200  | -1.12840700 | 0.40727400  |
| C | -3.09540200 | -1.13393100 | 0.66194500  |
| H | -2.62193500 | -1.58588600 | 1.54873600  |
| C | -4.42458600 | -0.50504400 | 1.08931700  |
| H | -5.00296000 | -0.12098100 | 0.23317900  |
| H | -5.04273800 | -1.27435700 | 1.57553800  |
| H | -4.26449600 | 0.31127300  | 1.80937400  |
| C | -3.28160800 | -2.22184400 | -0.40797800 |

|    |             |             |             |
|----|-------------|-------------|-------------|
| H  | -3.80563800 | -1.80500000 | -1.28344700 |
| H  | -2.31154600 | -2.60969700 | -0.74715700 |
| H  | -3.88374300 | -3.04895600 | -0.00251800 |
| N  | 1.97423000  | 0.08696900  | 0.22203200  |
| N  | -0.13823400 | 1.33712400  | -0.49429800 |
| N  | -2.07966500 | -0.17237500 | 0.18164500  |
| Ru | -0.03499400 | -0.40662500 | 0.36793200  |
| H  | 1.52531200  | -1.25319500 | -2.35681400 |
| C  | 1.13134100  | -2.19579600 | -1.93301800 |
| C  | 0.81012100  | -3.19100400 | -3.04175400 |
| O  | -0.06282900 | -1.92504900 | -1.19674300 |
| Cl | -0.20119100 | 0.57773200  | 2.54311200  |
| H  | 0.08588300  | -2.07486000 | 1.05124400  |
| H  | 0.02733000  | -2.25739700 | 0.02122100  |
| H  | 1.91734800  | -2.60910400 | -1.26928800 |
| H  | 0.03784300  | -2.78237800 | -3.71031000 |
| H  | 1.70948700  | -3.41175900 | -3.63939400 |
| H  | 0.43272000  | -4.13339800 | -2.61701200 |



**Table S26:** Optimized XYZ coordinates for complex **4c**

|    |             |             |             |
|----|-------------|-------------|-------------|
| Ru | -0.87748100 | -0.16959700 | -0.93286100 |
| P  | 1.06063300  | 0.12968900  | 0.39142900  |
| N  | -1.18165700 | -2.06781200 | -0.21549300 |
| N  | -2.13932300 | 0.18690200  | 0.48232500  |
| N  | -1.22223200 | 1.90594000  | -1.19433400 |
| C  | 1.97602600  | -1.39314700 | 0.93910500  |
| C  | -2.07160900 | -2.12489100 | 0.75558700  |
| H  | -2.38063600 | -3.08091600 | 1.20912500  |
| C  | 2.55413600  | 1.11229100  | -0.12476300 |
| C  | -2.64938300 | -0.87577900 | 1.19100000  |
| C  | 0.47721300  | 0.98227000  | 1.92113000  |
| C  | -2.08144200 | 2.36809700  | -0.31075100 |
| H  | -2.43728700 | 3.41380700  | -0.35341900 |
| C  | -2.62143000 | 1.45685600  | 0.66928500  |
| C  | -3.62056400 | -0.66082800 | 2.18538400  |
| H  | -4.01662100 | -1.51821500 | 2.74830300  |
| C  | 2.45248000  | -2.23664000 | -0.08951500 |
| H  | 2.21956200  | -1.99310800 | -1.14021300 |
| C  | -3.58209600 | 1.71371100  | 1.66359900  |
| H  | -3.94592200 | 2.74009300  | 1.81335400  |
| C  | 2.94601400  | 1.16347400  | -1.47769900 |
| H  | 2.32316300  | 0.66521300  | -2.23961700 |
| C  | -4.07515200 | 0.64554000  | 2.43147100  |
| H  | -4.83021800 | 0.82880300  | 3.20946900  |
| C  | 2.30595800  | -1.68733200 | 2.27784800  |
| H  | 1.99190200  | -1.01868300 | 3.09185800  |
| C  | 3.21367900  | -3.37145800 | 0.22419100  |
| H  | 3.57558800  | -4.02069400 | -0.58796300 |
| C  | 0.46825500  | 2.39368900  | 1.97591500  |

|    |             |             |             |
|----|-------------|-------------|-------------|
| H  | 0.94859000  | 2.97460900  | 1.17487200  |
| C  | -0.18720300 | 0.26253400  | 2.94065200  |
| H  | -0.24745200 | -0.83439700 | 2.89124400  |
| C  | 3.38145100  | 1.69914400  | 0.85809600  |
| H  | 3.10839800  | 1.63869700  | 1.92247600  |
| C  | 3.06177000  | -2.83155800 | 2.58489400  |
| H  | 3.30774200  | -3.05240300 | 3.63520800  |
| C  | 3.51185700  | -3.67989200 | 1.56171800  |
| H  | 4.10517700  | -4.57444100 | 1.80605200  |
| C  | -0.80086400 | 0.93643700  | 4.00645500  |
| H  | -1.31344300 | 0.35749900  | 4.78973400  |
| C  | 4.13410500  | 1.81978400  | -1.83972000 |
| H  | 4.42832100  | 1.85434800  | -2.90006900 |
| C  | -0.14815800 | 3.06438700  | 3.04375200  |
| H  | -0.13763700 | 4.16495500  | 3.07108200  |
| C  | 4.56153300  | 2.36020200  | 0.48745900  |
| H  | 5.19328700  | 2.82023200  | 1.26303600  |
| C  | -0.77841600 | 2.33921300  | 4.06646200  |
| H  | -1.26188500 | 2.86546600  | 4.90353100  |
| C  | 4.93924500  | 2.42644400  | -0.86398900 |
| H  | 5.86730800  | 2.94351300  | -1.15309300 |
| Cl | -2.76205900 | -0.49990600 | -2.39969400 |
| Cl | 0.60123400  | -0.89482900 | -2.75121700 |
| C  | -0.82943300 | 2.86722900  | -2.25942600 |
| C  | 0.47117100  | 3.58488800  | -1.88268900 |
| C  | -0.75864700 | 2.18544000  | -3.62397600 |
| H  | 0.37415800  | 4.11540700  | -0.91329400 |
| H  | 0.04788800  | 1.42740900  | -3.64875400 |
| C  | -0.64825200 | -3.32613800 | -0.78623500 |
| C  | -0.29047900 | -4.37424100 | 0.27134500  |

|   |             |             |             |
|---|-------------|-------------|-------------|
| C | -1.62849000 | -3.84999000 | -1.84552900 |
| H | 0.34257600  | -3.94339900 | 1.07272200  |
| H | -2.56938000 | -4.20360600 | -1.37375600 |
| H | -1.18707300 | -4.83870000 | 0.73285800  |
| H | -1.88059100 | -3.04601100 | -2.56323600 |
| H | 0.26805800  | -3.01412400 | -1.32220200 |
| H | -1.63537300 | 3.63666800  | -2.29812600 |
| H | -1.70505700 | 1.65626700  | -3.84453200 |
| H | 1.31386300  | 2.87444200  | -1.80864300 |
| H | -1.16594100 | -4.69792200 | -2.38938400 |
| H | 0.28461600  | -5.19116800 | -0.20786300 |
| H | -0.57066000 | 2.95019100  | -4.40447400 |
| H | 0.72150300  | 4.33399000  | -2.66019000 |

0

**Table S27:** Optimized XYZ coordinates for transition state of dissociation of PPh<sub>3</sub> from **4c** to **7c**

|    |             |             |             |
|----|-------------|-------------|-------------|
| Ru | 2.02291500  | -0.44598000 | -0.25198500 |
| P  | -1.62442900 | 0.11006400  | -0.19659300 |
| N  | 2.41147800  | 1.55286200  | -0.00329800 |
| N  | 1.34021500  | -0.20629200 | 1.48398800  |
| N  | 1.30046200  | -2.33023200 | 0.09514500  |
| C  | -2.79543100 | -0.63377400 | -1.43131100 |
| C  | 2.06167600  | 1.99322000  | 1.19397700  |
| H  | 2.18600600  | 3.04371000  | 1.49933500  |
| C  | -2.46139200 | -0.19977400 | 1.41917400  |
| C  | 1.44493700  | 1.03825500  | 2.07819600  |
| C  | -1.93368000 | 1.91084700  | -0.52428000 |
| C  | 0.78228700  | -2.45689300 | 1.30644300  |
| H  | 0.36674500  | -3.41726600 | 1.65860900  |
| C  | 0.76530100  | -1.28185600 | 2.13565000  |
| C  | 0.93494700  | 1.22844900  | 3.37378200  |
| H  | 1.00932700  | 2.22155100  | 3.83965900  |
| C  | -2.27393900 | -0.85280300 | -2.72587200 |
| H  | -1.22035600 | -0.60417200 | -2.93583400 |
| C  | 0.25480000  | -1.11013800 | 3.43378600  |
| H  | -0.22039700 | -1.96058300 | 3.94171200  |
| C  | -2.62419100 | 0.79968100  | 2.40261000  |
| H  | -2.35124300 | 1.84124400  | 2.17609700  |
| C  | 0.33929100  | 0.14897900  | 4.04954700  |
| H  | -0.07214400 | 0.29204000  | 5.05844600  |
| C  | -4.14469700 | -0.95344300 | -1.16976700 |
| H  | -4.56676300 | -0.78557100 | -0.16697200 |
| C  | -3.09067700 | -1.37989300 | -3.73800800 |
| H  | -2.67236400 | -1.54518500 | -4.74301200 |

|    |             |             |             |
|----|-------------|-------------|-------------|
| C  | -3.18168800 | 2.53894400  | -0.31848300 |
| H  | -4.02671800 | 1.96077500  | 0.08737900  |
| C  | -0.87202700 | 2.65748700  | -1.07487800 |
| H  | 0.08886300  | 2.15797200  | -1.27013100 |
| C  | -2.79329700 | -1.53426800 | 1.75855000  |
| H  | -2.65367200 | -2.33563600 | 1.01500800  |
| C  | -4.95454800 | -1.48927200 | -2.18356400 |
| H  | -6.00587200 | -1.73633300 | -1.96744000 |
| C  | -4.43059900 | -1.70393100 | -3.46896200 |
| H  | -5.06830800 | -2.12459100 | -4.26182800 |
| C  | -1.05074100 | 4.01238700  | -1.40236100 |
| H  | -0.21840600 | 4.58164700  | -1.84504200 |
| C  | -3.12885800 | 0.48010600  | 3.67408800  |
| H  | -3.25168700 | 1.27748100  | 4.42369500  |
| C  | -3.35344700 | 3.89454900  | -0.63326900 |
| H  | -4.32974500 | 4.37549800  | -0.46527200 |
| C  | -3.30032800 | -1.85030800 | 3.02615200  |
| H  | -3.56355800 | -2.89314900 | 3.26302400  |
| C  | -2.28731200 | 4.63499300  | -1.17440100 |
| H  | -2.42693200 | 5.69736300  | -1.42776500 |
| C  | -3.47357200 | -0.84218300 | 3.99145100  |
| H  | -3.87376700 | -1.08938300 | 4.98664900  |
| Cl | 4.07770800  | -1.03419600 | 0.62655800  |
| Cl | 1.45649900  | -0.16450100 | -2.53880600 |
| C  | 1.30808300  | -3.51601200 | -0.78515400 |
| C  | 0.12135200  | -3.44478500 | -1.75590400 |
| C  | 2.64836500  | -3.62661500 | -1.51550000 |
| H  | 0.09225100  | -4.35848700 | -2.38314300 |
| H  | 3.49446900  | -3.63769400 | -0.80207100 |
| C  | 3.02114100  | 2.44076200  | -1.01183900 |

|   |             |             |             |
|---|-------------|-------------|-------------|
| C | 2.91798700  | 3.93569900  | -0.70521500 |
| C | 4.47086300  | 2.00209400  | -1.26444400 |
| H | 1.87325500  | 4.24952500  | -0.50645400 |
| H | 5.09043600  | 2.15326300  | -0.35725800 |
| H | 3.54553200  | 4.23032500  | 0.16201600  |
| H | 4.51890900  | 0.93064800  | -1.53481500 |
| H | 2.44748500  | 2.21931800  | -1.94042600 |
| H | 1.17949000  | -4.41221300 | -0.13363400 |
| H | 2.66951000  | -4.55727500 | -2.11704800 |
| H | -0.84090000 | -3.36343800 | -1.21200000 |
| H | 0.22162800  | -2.56169600 | -2.41559100 |
| H | 4.90100700  | 2.59718900  | -2.09439700 |
| H | 3.28175800  | 4.51046400  | -1.57952600 |
| H | 2.78407800  | -2.76473500 | -2.19955400 |

**Table S28:** Optimized XYZ coordinates for complex **7c**

|    |             |             |             |
|----|-------------|-------------|-------------|
| C  | 1.19751200  | 2.03775300  | -0.04893400 |
| C  | -1.23404800 | 2.00555100  | -0.06232400 |
| C  | -1.25496800 | 3.41067200  | -0.08964100 |
| C  | -0.04587400 | 4.12777000  | -0.09593600 |
| C  | 1.18199000  | 3.44253900  | -0.07445300 |
| H  | -2.22419500 | 3.92978600  | -0.10048100 |
| H  | -0.06028000 | 5.22673600  | -0.11610000 |
| H  | 2.13736900  | 3.98683600  | -0.07857600 |
| C  | -2.32519900 | 1.07033500  | -0.02912600 |
| H  | -3.37329900 | 1.41139200  | -0.02095100 |
| C  | 2.31641500  | 1.13340000  | -0.06633100 |
| Ru | 0.01272900  | -0.50907400 | 0.01860200  |
| N  | -0.00838100 | 1.34777800  | -0.04822600 |
| N  | 2.02923600  | -0.15769800 | -0.04660200 |
| N  | -1.99118200 | -0.21049600 | 0.00042000  |
| C  | 3.06967800  | -1.19497800 | -0.16980400 |
| C  | 4.43274500  | -0.69239700 | -0.65044300 |
| C  | 3.17667500  | -1.97540300 | 1.14876200  |
| H  | 5.09641000  | -1.56070400 | -0.83045200 |
| H  | 3.59425500  | -1.33013200 | 1.94879500  |
| C  | -3.01943600 | -1.27090700 | 0.03035800  |
| C  | -4.13736400 | -0.99439100 | 1.04124900  |
| C  | -3.53181500 | -1.53045200 | -1.39342700 |
| H  | -3.71226800 | -0.76905500 | 2.03923400  |
| H  | -4.21307200 | -2.40480700 | -1.40113500 |
| Cl | -0.05990500 | -0.87115400 | 2.31768000  |
| H  | 2.18421100  | -2.32527100 | 1.49120700  |
| H  | 4.35243500  | -0.12663800 | -1.60037400 |

|    |             |             |             |
|----|-------------|-------------|-------------|
| H  | 2.65623500  | -1.87620500 | -0.94759900 |
| H  | -4.09080300 | -0.65059600 | -1.77484800 |
| H  | -4.78815400 | -0.15084900 | 0.73114400  |
| H  | 3.84408700  | -2.84996400 | 1.01654600  |
| H  | 4.93370400  | -0.05206000 | 0.10557400  |
| H  | -4.78482100 | -1.88913300 | 1.13155000  |
| H  | -2.68087300 | -1.72837500 | -2.07435200 |
| H  | -2.47101800 | -2.17419100 | 0.37135700  |
| Cl | 0.09087100  | -1.36729300 | -2.15006000 |
| H  | 3.34800100  | 1.51208200  | -0.13738700 |



**Table S29:** Optimized XYZ coordinates for complex **8e**

|    |             |             |             |
|----|-------------|-------------|-------------|
| C  | 1.28836500  | 2.18559500  | 0.38769500  |
| C  | -5.60521300 | 0.11229500  | -0.28868800 |
| C  | 1.31156900  | 3.54645000  | 0.70139300  |
| C  | -4.90801800 | -2.19646400 | -0.74344600 |
| C  | 0.11155900  | 4.25192200  | 0.86370000  |
| H  | -2.76911500 | -2.62669500 | -0.71680400 |
| C  | -1.11013100 | 3.58278600  | 0.70185700  |
| C  | -5.91323800 | -1.21602000 | -0.59515000 |
| C  | -1.12338000 | 2.22224500  | 0.38746300  |
| H  | -6.38677500 | 0.86729900  | -0.18266000 |
| H  | 2.27071900  | 4.05590800  | 0.81640600  |
| H  | -5.19659400 | -3.21939000 | -0.99265000 |
| H  | 0.12780100  | 5.31346500  | 1.11116400  |
| H  | -6.95895300 | -1.50060800 | -0.72838000 |
| H  | -2.05404900 | 4.11972800  | 0.81726200  |
| C  | 2.37869000  | 1.28143400  | 0.17903000  |
| N  | 0.07030600  | 1.51022600  | 0.24693600  |
| C  | 4.35879300  | 0.27199100  | -0.05948100 |
| Ru | 0.04810100  | -0.36762100 | -0.15399000 |
| C  | 3.30601900  | -0.67265800 | -0.21322600 |
| C  | 5.70321900  | -0.09809800 | -0.16439400 |
| C  | 3.58601300  | -2.02071700 | -0.46888200 |
| O  | 0.18048000  | -1.64418100 | 1.33199100  |
| C  | 5.96571200  | -1.44555300 | -0.42522600 |
| Cl | -0.00650500 | -0.07948100 | -2.54042500 |
| H  | 6.51147100  | 0.62717700  | -0.05073000 |
| C  | 4.92644200  | -2.39050800 | -0.57339900 |
| H  | 2.77067400  | -2.73710200 | -0.57677800 |

|   |             |             |             |
|---|-------------|-------------|-------------|
| H | 7.00273400  | -1.77548000 | -0.51575600 |
| H | 5.18183300  | -3.43278300 | -0.77422300 |
| C | -2.24074100 | 1.35089900  | 0.17443000  |
| N | 2.09471100  | -0.02105800 | -0.06139200 |
| C | -3.23212900 | -0.55718800 | -0.27510100 |
| N | -2.00001500 | 0.03903500  | -0.06349700 |
| C | -4.25133600 | 0.42477600  | -0.13348800 |
| N | -3.59238300 | 1.61044200  | 0.15841100  |
| N | 3.74052100  | 1.48809200  | 0.19389600  |
| C | -3.55769000 | -1.88378600 | -0.58673300 |
| C | -0.88288100 | -2.04340900 | 2.17991000  |
| H | -1.06617400 | -1.25363900 | 2.93755800  |
| H | -1.83294200 | -2.18556200 | 1.62543500  |
| H | 4.20238600  | 2.38314300  | 0.30470700  |
| H | -4.01913800 | 2.52472500  | 0.25355300  |
| C | -0.48932400 | -3.34637400 | 2.87284300  |
| H | 0.44544100  | -3.21009700 | 3.43671700  |
| H | -1.27902400 | -3.67551800 | 3.56769700  |
| H | -0.32575100 | -4.13949600 | 2.12722400  |

**Table S30:** Optimized XYZ coordinates for complex **TS-9e**

|    |             |             |             |
|----|-------------|-------------|-------------|
| C  | -1.23800000 | 2.23759100  | -0.25657600 |
| C  | 5.60540300  | 0.06284000  | 0.28112100  |
| C  | -1.27456800 | 3.64068700  | -0.37103500 |
| C  | 4.90241600  | -2.27864500 | 0.50192000  |
| C  | -0.06510900 | 4.33939500  | -0.42592500 |
| H  | 2.76181500  | -2.70019700 | 0.39781900  |
| C  | 1.16171100  | 3.65802200  | -0.36023600 |
| C  | 5.90962300  | -1.28718300 | 0.46533800  |
| C  | 1.14077400  | 2.26080500  | -0.23740600 |
| H  | 6.38594800  | 0.82614900  | 0.26974000  |
| H  | -2.22523900 | 4.17548800  | -0.41168200 |
| H  | 5.18880600  | -3.31861000 | 0.67019100  |
| H  | -0.07347000 | 5.42684100  | -0.51787600 |
| H  | 6.95267400  | -1.58284800 | 0.59550400  |
| H  | 2.10376200  | 4.20720500  | -0.40305900 |
| C  | -2.31778100 | 1.28923100  | -0.15926600 |
| N  | -0.03980300 | 1.58607500  | -0.20141500 |
| C  | -4.29809000 | 0.28068500  | 0.08274200  |
| Ru | -0.02904200 | -0.44083400 | -0.07014200 |
| H  | -1.29293000 | -2.34364600 | -1.57766500 |
| C  | -3.25151200 | -0.68145800 | 0.11064600  |
| C  | -0.22543400 | -2.03777700 | -1.59840500 |
| C  | -5.64073900 | -0.08433200 | 0.23126300  |
| C  | -3.53348300 | -2.03780800 | 0.31647100  |
| O  | 0.05023200  | -0.87511800 | -2.14359400 |
| C  | -5.90560700 | -1.44217900 | 0.42053900  |
| Cl | -0.01025300 | -0.28535100 | 2.34992000  |
| H  | -6.44447100 | 0.65434700  | 0.20955800  |

|   |             |             |             |
|---|-------------|-------------|-------------|
| H | 0.01661400  | -2.08956600 | 0.10740300  |
| C | -4.86999900 | -2.40264800 | 0.46791200  |
| H | -2.71695500 | -2.75872100 | 0.37679100  |
| H | -6.94039300 | -1.76831000 | 0.54405600  |
| H | -5.12549200 | -3.45068700 | 0.63561100  |
| C | 2.24518000  | 1.32870500  | -0.12400900 |
| N | -2.03709900 | -0.03561100 | -0.05969300 |
| C | 3.23501200  | -0.60767700 | 0.13543600  |
| N | 2.00564800  | 0.00142000  | -0.04094900 |
| C | 4.25321700  | 0.38519300  | 0.12390400  |
| N | 3.59234200  | 1.59161100  | -0.04686300 |
| N | -3.67735400 | 1.50636900  | -0.09507600 |
| C | 3.55664600  | -1.95567900 | 0.34161800  |
| H | 4.01520000  | 2.51297800  | -0.04235400 |
| H | -4.13136600 | 2.41232400  | -0.09980500 |
| C | 0.73554900  | -3.18433400 | -1.86293800 |
| H | 0.53731900  | -4.04853600 | -1.21122600 |
| H | 0.60612400  | -3.50229500 | -2.91177200 |
| H | 1.77496500  | -2.85295200 | -1.73560800 |

**Table S31:** Optimized XYZ coordinates for complex **10e**

|    |             |             |             |
|----|-------------|-------------|-------------|
| C  | 1.19776800  | 2.20608200  | -0.02061400 |
| C  | -5.93010600 | -1.44925600 | 0.05422800  |
| C  | 1.21361200  | 3.60577600  | -0.05247000 |
| H  | -6.44215300 | 0.66579100  | 0.02944400  |
| C  | 0.00005800  | 4.30792500  | -0.06629600 |
| H  | -5.17983700 | -3.47993800 | 0.07745000  |
| C  | -1.21350200 | 3.60578500  | -0.05260200 |
| H  | -6.97307800 | -1.77306600 | 0.06606800  |
| C  | -1.19767700 | 2.20609000  | -0.02068000 |
| C  | 2.29524500  | 1.27789700  | -0.00801700 |
| H  | 2.16345000  | 4.14448600  | -0.06699200 |
| C  | 4.29419300  | 0.27670400  | 0.01933100  |
| H  | 0.00006300  | 5.39827700  | -0.09057800 |
| H  | -2.16333300 | 4.14450500  | -0.06720100 |
| C  | 3.25906600  | -0.69815100 | 0.02424800  |
| N  | 0.00004800  | 1.50740000  | -0.00406400 |
| C  | 5.64613500  | -0.08175300 | 0.03386600  |
| Ru | 0.00006300  | -0.44901500 | 0.02086200  |
| C  | 3.55790400  | -2.06706200 | 0.04571400  |
| Cl | -0.00031900 | -2.83092300 | -0.24645100 |
| C  | 5.93008500  | -1.44938500 | 0.05429900  |
| H  | 0.00033800  | -0.39040900 | 1.58330700  |
| H  | 6.44217600  | 0.66565800  | 0.03017900  |
| C  | -2.29519100 | 1.27793700  | -0.00808700 |
| C  | 4.90570100  | -2.42331300 | 0.06033300  |
| C  | -3.25907600 | -0.69808400 | 0.02454400  |
| H  | 2.74288300  | -2.79382600 | 0.04557000  |
| C  | -4.29417500 | 0.27679500  | 0.01915000  |

|   |             |             |             |
|---|-------------|-------------|-------------|
| H | 6.97304900  | -1.77321800 | 0.06627200  |
| H | 5.17977000  | -3.48005500 | 0.07681400  |
| C | -3.55793700 | -2.06698300 | 0.04631500  |
| N | 2.02834400  | -0.05351300 | 0.00401200  |
| C | -5.64612700 | -0.08163300 | 0.03349300  |
| N | -2.02833800 | -0.05347900 | 0.00441200  |
| C | -4.90574400 | -2.42320500 | 0.06074000  |
| N | -3.65308700 | 1.50708200  | -0.00205500 |
| H | -2.74292700 | -2.79376300 | 0.04655500  |
| N | 3.65314200  | 1.50700900  | -0.00170800 |
| H | -4.09977900 | 2.41674600  | -0.00746400 |
| H | 4.09985700  | 2.41666400  | -0.00680600 |

**Table S32.** Optimized XYZ coordinates for complex **TS-11e**

|    |             |             |             |
|----|-------------|-------------|-------------|
| C  | -1.16038300 | 2.54641200  | 0.05433000  |
| C  | 5.96432900  | -0.89491400 | -1.08474400 |
| C  | -1.17335700 | 3.90926100  | 0.37287800  |
| H  | 6.44783400  | 1.14355300  | -0.49879500 |
| C  | 0.04044800  | 4.57901000  | 0.58005600  |
| H  | 5.22530300  | -2.84112200 | -1.67772400 |
| C  | 1.24730800  | 3.87494800  | 0.48704200  |
| H  | 7.00534700  | -1.16503200 | -1.27339100 |
| C  | 1.22469000  | 2.51392700  | 0.15637900  |
| C  | -2.26340300 | 1.65225000  | -0.15830400 |
| H  | -2.12261600 | 4.43747500  | 0.48285200  |
| C  | -4.24906300 | 0.71906300  | -0.58853000 |
| H  | 0.04325200  | 5.63850200  | 0.83889300  |
| H  | 2.19649700  | 4.37572200  | 0.68840800  |
| C  | -3.21981300 | -0.25956900 | -0.66619800 |
| N  | 0.03248100  | 1.85677900  | -0.08302900 |
| C  | -5.58899100 | 0.40012700  | -0.83225100 |
| Ru | 0.00900300  | -0.08477700 | -0.25942800 |
| C  | -3.51402700 | -1.58271500 | -1.02168900 |
| Cl | -0.01474900 | -0.02575200 | 2.44536100  |
| C  | -5.86854900 | -0.92657000 | -1.16978100 |
| H  | 0.02643200  | -0.20541000 | -1.84074100 |
| H  | -6.38041400 | 1.14982100  | -0.77007100 |
| C  | 2.31878900  | 1.60181000  | -0.01301600 |
| C  | -4.84938900 | -1.89960600 | -1.26874500 |
| C  | 3.28682700  | -0.27379100 | -0.60838500 |
| H  | -2.70798300 | -2.31313500 | -1.11188800 |
| C  | 4.31591900  | 0.69259000  | -0.42510900 |

|   |             |             |             |
|---|-------------|-------------|-------------|
| H | -6.90245600 | -1.21581800 | -1.36945600 |
| H | -5.11571900 | -2.92062300 | -1.54887200 |
| C | 3.60664300  | -1.55553100 | -1.07763600 |
| N | -2.00217000 | 0.33981200  | -0.37175600 |
| C | 5.66465100  | 0.39719700  | -0.64705100 |
| N | 2.05750000  | 0.30332700  | -0.30685000 |
| C | 4.95064600  | -1.85141900 | -1.30749500 |
| N | 3.67165600  | 1.85770100  | -0.04601200 |
| H | 2.81765000  | -2.27712600 | -1.29003300 |
| N | -3.61348800 | 1.90802500  | -0.26522900 |
| H | 4.10579600  | 2.76002500  | 0.10983600  |
| H | -4.05196800 | 2.81676300  | -0.17129000 |
| O | 0.45038100  | -2.97872300 | 2.05717100  |
| C | 0.66521800  | -3.00032800 | 0.52342500  |
| H | 1.69435600  | -2.61501300 | 0.42505100  |
| H | 0.67309000  | -2.03840100 | 2.32734400  |
| O | -0.25439100 | -2.21873300 | -0.11168700 |
| H | -1.49789600 | -2.26245100 | 0.84328300  |
| C | 0.55660800  | -4.46704700 | 0.14432000  |
| H | 0.76257200  | -4.57371100 | -0.93042000 |
| H | 1.26723700  | -5.07986600 | 0.71660000  |
| H | -0.46602500 | -4.82805300 | 0.33373500  |
| O | -1.86919600 | -2.36215200 | 1.81644900  |
| H | -1.71438500 | -1.43631200 | 2.15877400  |
| H | -0.81813700 | -2.81509800 | 2.11928900  |



**Table S33:** Optimized XYZ coordinates for complex **12e**

|    |             |             |             |
|----|-------------|-------------|-------------|
| C  | -1.17019300 | 2.55206100  | -0.06962600 |
| C  | 5.94597600  | -1.09891800 | -0.31780900 |
| C  | -1.18743700 | 3.94420200  | 0.08153400  |
| H  | 6.45731500  | 0.98271500  | 0.05219500  |
| C  | 0.02276300  | 4.63744900  | 0.21232600  |
| H  | 5.19613900  | -3.09276700 | -0.70407200 |
| C  | 1.23271800  | 3.93207300  | 0.19714000  |
| H  | 6.98762800  | -1.42671600 | -0.32167700 |
| C  | 1.21800900  | 2.54075800  | 0.03776500  |
| C  | -2.26901200 | 1.63624700  | -0.17813300 |
| H  | -2.13801900 | 4.48074000  | 0.10729500  |
| C  | -4.27755900 | 0.66701700  | -0.26005900 |
| H  | 0.02251100  | 5.72131700  | 0.33351400  |
| H  | 2.18239300  | 4.45911500  | 0.30846300  |
| C  | -3.25225900 | -0.31960900 | -0.30224400 |
| N  | 0.02302100  | 1.85426900  | -0.10940400 |
| C  | -5.63492700 | 0.33150300  | -0.28412800 |
| Ru | 0.03175300  | -0.06949400 | -0.28897900 |
| C  | -3.58295600 | -1.68164700 | -0.33278300 |
| Cl | -0.03575700 | -0.57225600 | 2.23420000  |
| C  | -5.94504300 | -1.02905500 | -0.33817900 |
| H  | 0.03016000  | -0.01367300 | -1.89322700 |
| H  | -6.41659500 | 1.09331500  | -0.25301700 |
| C  | 2.31628600  | 1.62084300  | -0.02962700 |
| C  | -4.93639600 | -2.01735000 | -0.35236000 |
| C  | 3.27479900  | -0.33343700 | -0.30708700 |
| H  | -2.80116600 | -2.43951900 | -0.26606200 |
| C  | 4.31168300  | 0.61996500  | -0.10747000 |

|   |             |             |             |
|---|-------------|-------------|-------------|
| H | -6.99325800 | -1.33497200 | -0.35384700 |
| H | -5.22534000 | -3.07025600 | -0.36231000 |
| C | 3.57809600  | -1.68219200 | -0.53298000 |
| N | -2.01359400 | 0.31003900  | -0.27387400 |
| C | 5.66120600  | 0.25229400  | -0.10592100 |
| N | 2.04898900  | 0.31103800  | -0.24420200 |
| C | 4.92316500  | -2.04952500 | -0.53280900 |
| N | 3.67455300  | 1.84006600  | 0.05390600  |
| H | 2.77034200  | -2.39152600 | -0.71559300 |
| N | -3.62285900 | 1.88501600  | -0.18453200 |
| H | 4.12012800  | 2.72768700  | 0.25467600  |
| H | -4.05772900 | 2.79638800  | -0.10027000 |
| O | -1.02796500 | -3.18030400 | 1.10423400  |
| C | 0.16048000  | -3.27001500 | 0.40499200  |
| H | 1.02229700  | -2.95228100 | 1.01640400  |
| H | -0.94492500 | -2.34155000 | 1.64536300  |
| O | 0.20464500  | -2.28806400 | -0.70604900 |
| H | -0.51556200 | -2.51626300 | -1.32134900 |
| C | 0.32210600  | -4.66751100 | -0.16202600 |
| H | 1.23864800  | -4.74504600 | -0.76323200 |
| H | 0.36724700  | -5.39363500 | 0.66137600  |
| H | -0.54471300 | -4.92391500 | -0.79280900 |

**Table S34:** Optimized XYZ coordinates for complex **TS-13e**

|    |             |             |             |
|----|-------------|-------------|-------------|
| C  | 1.07484200  | 2.20000600  | 0.40144600  |
| C  | -4.94747100 | -2.33277700 | -0.89608000 |
| C  | 1.07886600  | 3.55665300  | 0.75278900  |
| H  | -2.78976700 | -2.65679700 | -1.00777700 |
| C  | -0.14259700 | 4.20269400  | 0.98194300  |
| C  | -5.98639900 | -1.41948100 | -0.60533300 |
| C  | -1.34723000 | 3.50111700  | 0.83391300  |
| H  | -6.52977000 | 0.58981600  | 0.02675100  |
| C  | -1.30859000 | 2.14675300  | 0.48019300  |
| H  | -5.20528700 | -3.34282600 | -1.22031600 |
| H  | 2.01945200  | 4.10408500  | 0.83747900  |
| H  | -7.02407700 | -1.74337600 | -0.70870400 |
| H  | -0.15735200 | 5.25786900  | 1.25777200  |
| C  | 2.18176400  | 1.33564700  | 0.08394000  |
| H  | -2.30315000 | 4.00806600  | 0.97845300  |
| C  | 4.18124600  | 0.43387900  | -0.35118700 |
| N  | -0.10617000 | 1.50162000  | 0.30417900  |
| Ru | -0.09438800 | -0.38393400 | -0.30343800 |
| C  | 3.16136100  | -0.54473800 | -0.50223800 |
| H  | 1.60331100  | -2.51282900 | 1.51619200  |
| C  | 5.52967500  | 0.13416900  | -0.57088000 |
| C  | 0.85888000  | -2.01155200 | 2.17713400  |
| C  | 3.47348300  | -1.85212400 | -0.89452300 |
| C  | 5.82597200  | -1.17581300 | -0.95387100 |
| O  | -0.30499400 | -1.71136500 | 1.42432000  |
| H  | 6.31410300  | 0.88435200  | -0.45396000 |
| Cl | -0.06635700 | 0.37044400  | -2.57780100 |
| C  | 4.81671500  | -2.15149200 | -1.11577200 |

|   |             |             |             |
|---|-------------|-------------|-------------|
| H | -0.08419500 | -2.09014700 | -0.81820100 |
| H | 2.67557300  | -2.58340800 | -1.03158000 |
| H | 6.86638500  | -1.45113000 | -1.13820600 |
| H | 5.09843300  | -3.15908100 | -1.42729900 |
| N | 1.93418100  | 0.03342100  | -0.21452400 |
| C | -2.39449900 | 1.23754200  | 0.21749900  |
| N | -2.11273800 | -0.02761700 | -0.16953200 |
| C | -3.32530900 | -0.66354600 | -0.36538800 |
| N | -3.75413200 | 1.43479700  | 0.28672200  |
| C | -4.37642900 | 0.25083500  | -0.07908500 |
| N | 3.53012600  | 1.60023000  | 0.02239600  |
| C | -3.60686300 | -1.97076100 | -0.78134500 |
| H | -0.20304600 | -2.15645300 | 0.18107800  |
| C | -5.72262200 | -0.11193000 | -0.19247000 |
| H | 3.96297800  | 2.50254000  | 0.18382900  |
| H | -4.21516200 | 2.30020300  | 0.54305900  |
| C | 0.46436000  | -2.92436000 | 3.32857700  |
| H | 1.34712500  | -3.18244500 | 3.93146700  |
| H | -0.26475900 | -2.40018000 | 3.96297500  |
| H | 0.00379000  | -3.84357700 | 2.94155300  |
| O | 1.43597900  | -0.84490200 | 2.74260900  |
| H | 1.74486400  | -0.32048700 | 1.98363400  |

**Table S35:** Optimized XYZ coordinates for complex **14e**

|    |             |             |             |
|----|-------------|-------------|-------------|
| C  | 1.30563300  | 2.13061900  | -0.15601200 |
| C  | -5.55762000 | -0.11762800 | -0.48524700 |
| C  | 1.31038900  | 3.52777900  | -0.14086200 |
| C  | -4.83156600 | -2.46233900 | -0.48029500 |
| C  | 0.10408200  | 4.23562500  | -0.19588800 |
| H  | -2.68399300 | -2.85118300 | -0.41891300 |
| C  | -1.10563100 | 3.52947600  | -0.26059000 |
| C  | -5.84993100 | -1.48396300 | -0.50969100 |
| C  | -1.09903500 | 2.13469500  | -0.27442000 |
| H  | -6.34926200 | 0.63383500  | -0.51370900 |
| H  | 2.26160600  | 4.06097200  | -0.08202300 |
| H  | -5.10892500 | -3.51779800 | -0.51043500 |
| H  | 0.10489600  | 5.32566100  | -0.18338900 |
| H  | -6.89331400 | -1.80226800 | -0.55783000 |
| H  | -2.05688800 | 4.06455600  | -0.29534600 |
| C  | 2.41087000  | 1.22009100  | -0.11587400 |
| N  | 0.10112800  | 1.42492900  | -0.23391700 |
| C  | 4.40795000  | 0.21894600  | -0.08736800 |
| Ru | 0.10290600  | -0.48621400 | -0.20849200 |
| C  | 3.37218700  | -0.75541400 | -0.13567500 |
| C  | 5.75906800  | -0.13961400 | -0.06343400 |
| C  | 3.67813300  | -2.12154100 | -0.17124800 |
| O  | 0.15294100  | -0.85497700 | 1.76628700  |
| C  | 6.04708200  | -1.50653400 | -0.09345600 |
| Cl | 0.17064100  | -1.23053100 | -2.49336400 |
| H  | 6.55344800  | 0.60854000  | -0.02643000 |
| C  | 5.02526300  | -2.48016000 | -0.14864200 |
| H  | 2.87716300  | -2.85989200 | -0.22764500 |

|   |             |             |             |
|---|-------------|-------------|-------------|
| H | 7.09019100  | -1.82915900 | -0.07801500 |
| H | 5.30010800  | -3.53631000 | -0.17856800 |
| C | -2.20649600 | 1.22587100  | -0.32641200 |
| N | 2.14949000  | -0.10741200 | -0.14803500 |
| C | -3.17406800 | -0.74325300 | -0.39265600 |
| N | -1.94970400 | -0.10121400 | -0.32410000 |
| C | -4.20611900 | 0.23553500  | -0.42632700 |
| N | -3.55956000 | 1.46275800  | -0.38338500 |
| N | 3.76733300  | 1.44970400  | -0.07672800 |
| C | -3.48376600 | -2.10904600 | -0.42288300 |
| C | -0.95437500 | -0.67927800 | 2.56900600  |
| H | -1.86191900 | -1.18028900 | 2.15240900  |
| H | 4.21468900  | 2.35875000  | -0.06301600 |
| H | -3.99949900 | 2.37461900  | -0.42782700 |
| C | -0.64093000 | -1.24047400 | 3.95723300  |
| H | 0.23401300  | -0.71208800 | 4.36172300  |
| H | -1.49515400 | -1.10545800 | 4.64100300  |
| H | -0.41312300 | -2.31452600 | 3.88992800  |
| O | -1.22526500 | 0.74707000  | 2.64133000  |
| H | -2.05170000 | 0.84001200  | 3.14556500  |

**Table S36:** Optimized XYZ coordinates for complex **TS-15e**

|    |             |             |             |
|----|-------------|-------------|-------------|
| C  | -1.16139600 | 2.33114800  | -0.31383400 |
| C  | 5.63556900  | 0.07098100  | 0.36268100  |
| C  | -1.17932600 | 3.71953800  | -0.52691300 |
| C  | 4.87755900  | -2.22918500 | 0.76260100  |
| C  | 0.04070500  | 4.39799600  | -0.64531300 |
| H  | 2.72712500  | -2.60739600 | 0.66914400  |
| C  | 1.25476400  | 3.70168300  | -0.55031900 |
| C  | 5.90696600  | -1.26650800 | 0.65907000  |
| C  | 1.22046100  | 2.31515800  | -0.33701700 |
| H  | 6.43362700  | 0.81371600  | 0.30277800  |
| H  | -2.12370500 | 4.26250400  | -0.59891300 |
| H  | 5.13729200  | -3.25756200 | 1.02123700  |
| H  | 0.04677500  | 5.47629900  | -0.81205800 |
| H  | 6.94144100  | -1.57278200 | 0.82780200  |
| H  | 2.20499700  | 4.23164200  | -0.63907600 |
| C  | -2.25698900 | 1.41089800  | -0.13743800 |
| N  | 0.02650900  | 1.65531700  | -0.23491400 |
| C  | -4.24887800 | 0.46071700  | 0.22489800  |
| Ru | 0.01643000  | -0.34979700 | -0.00889000 |
| C  | -3.22346400 | -0.52475200 | 0.24913100  |
| C  | -0.14906600 | -2.09967800 | -1.64328400 |
| C  | -5.59125700 | 0.13495200  | 0.44573400  |
| C  | -3.52454400 | -1.86713900 | 0.51800700  |
| O  | 0.02738500  | -0.90612400 | -2.09123600 |
| C  | -5.87683100 | -1.20823100 | 0.70168800  |
| Cl | 0.02602000  | -0.20674800 | 2.38857300  |
| H  | -6.37854600 | 0.89127500  | 0.42974900  |
| H  | 0.02400000  | -2.02211100 | 0.11827500  |

|   |             |             |             |
|---|-------------|-------------|-------------|
| C | -4.86262300 | -2.19117400 | 0.73937700  |
| H | -2.72393200 | -2.60695900 | 0.55219200  |
| H | -6.91198400 | -1.50406500 | 0.88453900  |
| H | -5.13450400 | -3.22589800 | 0.95661200  |
| C | 2.30826400  | 1.37958300  | -0.17548000 |
| N | -2.00139400 | 0.08552300  | 0.00459300  |
| C | 3.25369500  | -0.55683600 | 0.23754900  |
| N | 2.03876300  | 0.06318300  | -0.00211400 |
| C | 4.29330000  | 0.41058900  | 0.16224200  |
| N | 3.66299100  | 1.61530600  | -0.10726400 |
| N | -3.60735200 | 1.66218800  | -0.03131900 |
| C | 3.54117300  | -1.89003900 | 0.55748100  |
| H | 4.10590000  | 2.52588000  | -0.15233700 |
| H | -4.03694000 | 2.58025900  | -0.03587000 |
| C | 0.92892500  | -3.15106300 | -1.79694400 |
| H | 0.73472300  | -4.02108900 | -1.15745900 |
| H | 0.92245500  | -3.47744700 | -2.85006100 |
| H | 1.90644000  | -2.71664700 | -1.56434400 |
| O | -1.39963400 | -2.66934800 | -1.74463500 |
| H | -2.02109700 | -1.92252600 | -1.84621700 |



**Table S37:** Optimized XYZ coordinates for complex **TS-16e**

|    |             |             |             |
|----|-------------|-------------|-------------|
| C  | 1.10370900  | 2.19179000  | 0.34573500  |
| C  | -4.90510200 | -2.43502200 | -0.65285100 |
| C  | 1.10468000  | 3.56529300  | 0.62240800  |
| H  | -2.74503600 | -2.75950900 | -0.72328300 |
| C  | -0.11977400 | 4.22711800  | 0.78954500  |
| C  | -5.94784300 | -1.50389400 | -0.44528200 |
| C  | -1.32362500 | 3.52075100  | 0.66359700  |
| H  | -6.50017400 | 0.54893300  | 0.01643900  |
| C  | -1.28403100 | 2.14766500  | 0.38716100  |
| H  | -5.15813400 | -3.46883000 | -0.89594700 |
| H  | 2.04529100  | 4.11441000  | 0.69670000  |
| H  | -6.98416600 | -1.83767500 | -0.52955500 |
| H  | -0.13587800 | 5.29658600  | 1.00351800  |
| C  | 2.21155900  | 1.30348900  | 0.10784400  |
| H  | -2.28035000 | 4.03614500  | 0.76807300  |
| C  | 4.21621000  | 0.37111100  | -0.21780300 |
| N  | -0.07909900 | 1.49329900  | 0.25806500  |
| Ru | -0.05718200 | -0.42574100 | -0.20809300 |
| C  | 3.19103300  | -0.60346100 | -0.36438900 |
| H  | 1.80510500  | -2.20297500 | 1.76818600  |
| C  | 5.56791700  | 0.05089200  | -0.38176900 |
| C  | 1.03075700  | -1.70327100 | 2.38541600  |
| C  | 3.50389800  | -1.92823900 | -0.69417500 |
| C  | 5.86399000  | -1.27579500 | -0.70345900 |
| O  | -0.17690300 | -1.52693500 | 1.64908900  |
| H  | 6.35568900  | 0.79859700  | -0.27019900 |
| Cl | -0.05945200 | 0.11303700  | -2.54689300 |
| C  | 4.85064300  | -2.24821900 | -0.85956400 |

|   |             |             |             |
|---|-------------|-------------|-------------|
| H | -0.03639400 | -2.19527500 | -0.52624000 |
| H | 2.70328800  | -2.65724100 | -0.82864400 |
| H | 6.90707600  | -1.56676300 | -0.84377300 |
| H | 5.13196900  | -3.26972000 | -1.12266900 |
| N | 1.96300200  | -0.00342800 | -0.14495600 |
| C | -2.36638500 | 1.22074700  | 0.18450000  |
| N | -2.07938900 | -0.07180200 | -0.09581000 |
| C | -3.29029800 | -0.72333600 | -0.24784800 |
| N | -3.72788100 | 1.41982500  | 0.22911100  |
| C | -4.34525000 | 0.20884100  | -0.04511000 |
| N | 3.56445700  | 1.55686900  | 0.08605300  |
| C | -3.56605400 | -2.06057000 | -0.55837600 |
| H | -0.12071600 | -2.14355400 | 0.47171600  |
| C | -5.68967400 | -0.16603700 | -0.13861200 |
| H | 3.99776200  | 2.46523100  | 0.20590200  |
| H | -4.19199800 | 2.30496600  | 0.39679200  |
| C | 0.73490900  | -2.53476200 | 3.62982500  |
| H | 1.64625100  | -2.66982500 | 4.23526800  |
| H | -0.02696100 | -2.03781000 | 4.24894900  |
| H | 0.35133000  | -3.52751500 | 3.34913400  |
| H | 1.44271400  | -0.71563000 | 2.67221500  |

## 11. Arrhenius Plots

### Calculation of Activation Energy ( $E_a$ )

To determine the activation energy using Arrhenius plot, the following rate law equation was employed as reported very recently by Qin and Zheng<sup>16c</sup>. The evolution of gas recorded in 1 hour was used for the plot and rate constants at different reaction temperature (100-160 °C) were determined by good linear fitting using the below equation, where  $[\text{EtOH}]_0$  and  $[\text{H}_2\text{O}]_0$  refer to the initial concentration of ethanol and water, while  $[\text{EtOH}]_t$  and  $[\text{H}_2\text{O}]_t$  are the molar concentrations at time  $t$ .

$$\ln \frac{[\text{EtOH}]_t}{[\text{H}_2\text{O}]_t} = k([\text{EtOH}]_0 - [\text{H}_2\text{O}]_0) \cdot t + \ln \frac{[\text{EtOH}]_0}{[\text{H}_2\text{O}]_0} \dots\dots(1)$$

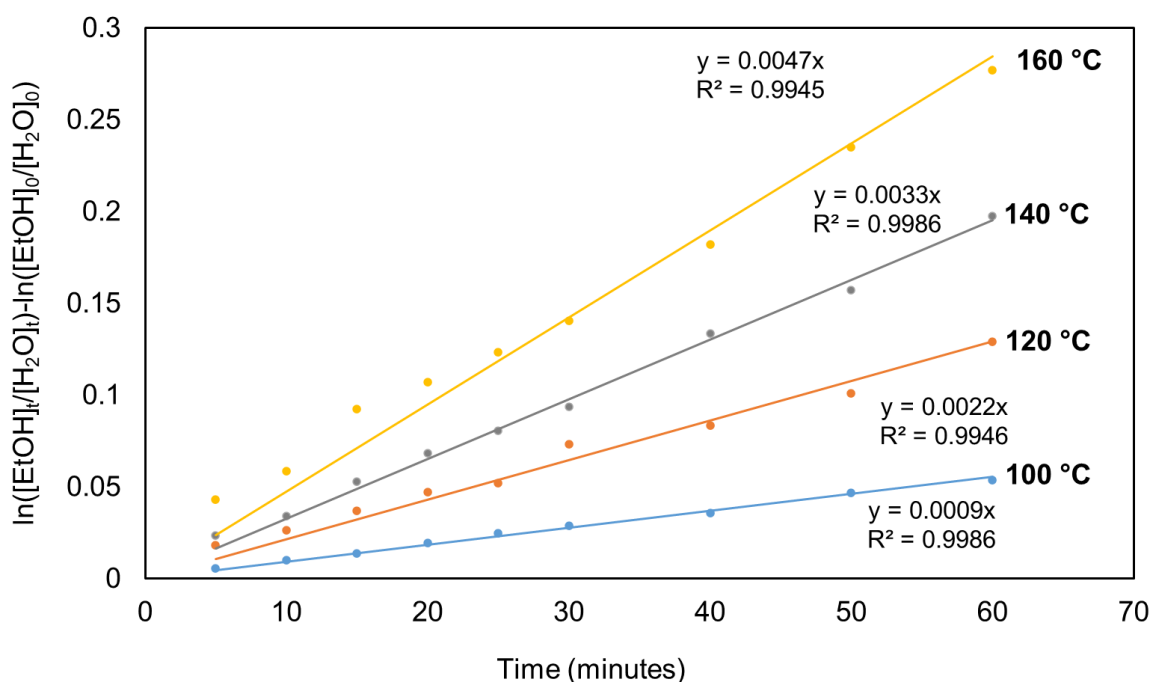

**Figure S28.** Plot for the calculation of rate constant by linear fitting based on eq 1. Reaction conditions : **4b** (0.2 mol%), EtOH (4.64 mmol) with  $\text{H}_2\text{O}$  (2.32 mmol) in the presence of KO<sup>t</sup>Bu (3.48 mmol) at 100 °C, 120 °C, 140 °C and, 160 °C. The  $\text{H}_2$  evolved in first 1 hour of the reaction has been considered.

The value of rate constants at different temperature were obtained from the slopes of the graph shown in Figure S28 based on eq 1.

Further, Arrhenius equation (eq 2) was employed to obtain an activation energy ( $E_a$ ) of 8.68 kcalmol<sup>-1</sup> by linear fitting of  $\ln k$  versus  $(1000/T)$ ,<sup>16c</sup> where  $k$  = rate constant,  $R$  = gas constant (1.9872 calmol<sup>-1</sup>K<sup>-1</sup>) and  $T$  = temperature in K.

$$\ln k = \ln A - \frac{1000.E_a}{RT} \dots\dots\dots(2)$$

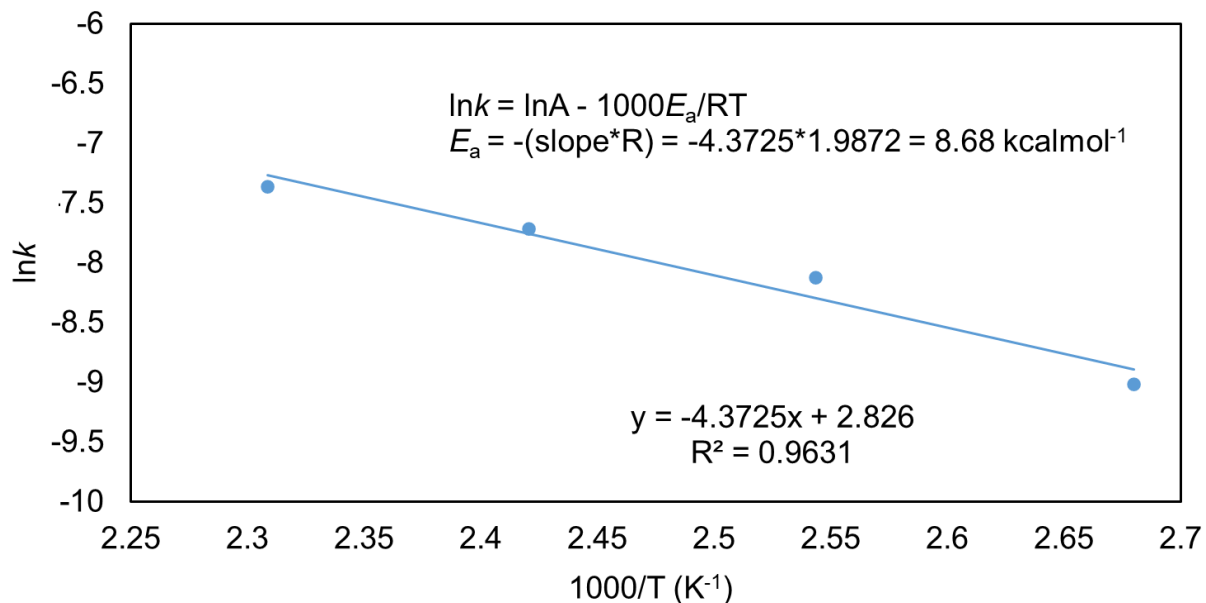

**Figure S29.** Arrhenius plot of  $\ln k$  vs.  $1000/T$  based on eq 2, at  $T = 373.15$  K,  $393.15$  K,  $413.15$  K and  $415.15$  K.

The thermodynamic parameters, including activation Gibbs free energy ( $\Delta G^\ddagger$ ), activation enthalpy ( $\Delta H^\ddagger$ ) and activation entropy ( $\Delta S^\ddagger$ ) were calculated by using the Eyring equation (eq 3)<sup>100</sup>, where where  $k$  = rate constant,  $k_B$  = Boltzmann constant,  $h$  = Planck's constant,  $R$  = gas constant ( $1.9872 \text{ calmol}^{-1}\text{K}^{-1}$ ) and  $T$  = temperature in K.

The plot of  $\ln(k/T)$  vs.  $(1000/T)$ , gave the value of  $\Delta H^\ddagger = 7.89 \text{ kcalmol}^{-1}$  and  $\Delta S^\ddagger = -0.55 \text{ kcalmol}^{-1}\text{K}^{-1}$ . The Gibbs free energy,  $\Delta G^\ddagger_{25}$  was calculated using  $\Delta G^\ddagger = \Delta H^\ddagger - T\Delta S^\ddagger$  which was found to be  $24.28 \text{ kcalmol}^{-1}$ .

$$\ln \frac{k}{T} = \ln \frac{k_B}{h} + \frac{\Delta S^\ddagger}{T} - \frac{\Delta H^\ddagger}{R} \left(\frac{1}{T}\right) \dots \dots \dots (3)$$

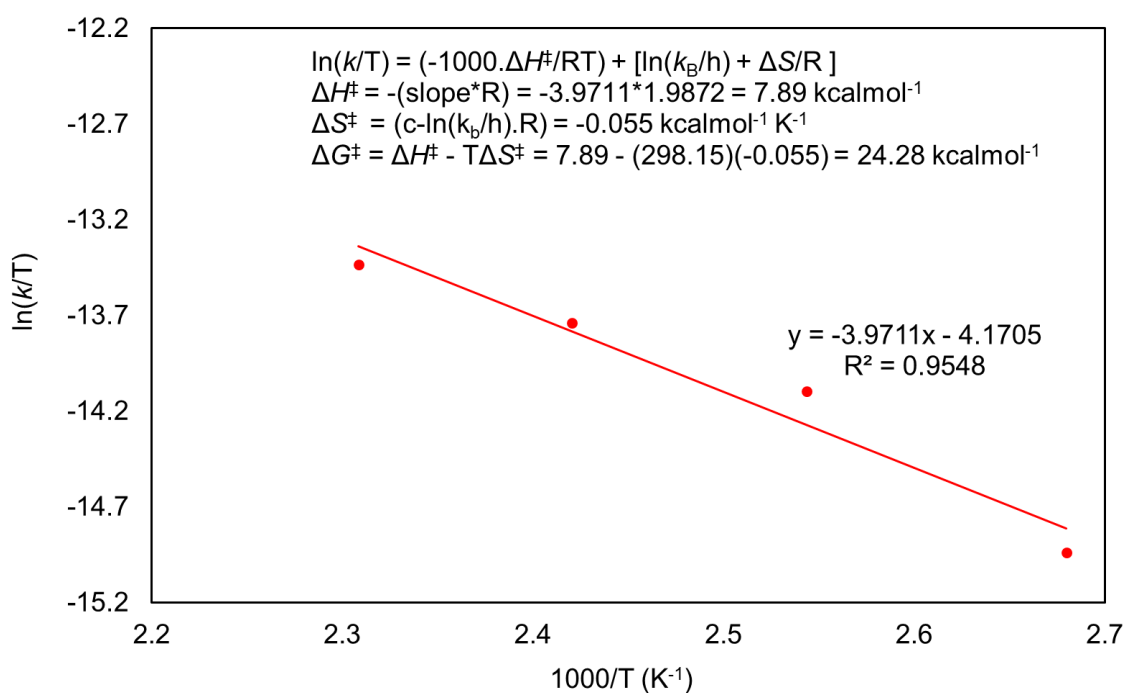

**Figure S30.** Eyring plot of  $\ln(k/T)$  vs.  $1000/T$  based on eq 3, at  $T = 373.15 \text{ K}$ ,  $393.15 \text{ K}$ ,  $413.15 \text{ K}$  and  $415.15 \text{ K}$ .
